1                   **The tumor suppressor microRNA let-7 inhibits human**

2                                           **LINE-1 retrotransposition**

3

4           Pablo Tristán-Ramos<sup>1,2</sup>, Alejandro Rubio-Roldan<sup>1,5</sup>, Guillermo Peris<sup>1,3,5</sup>, Laura  
5           Sánchez<sup>1,5</sup>, Suyapa Amador-Cubero<sup>1</sup>, Sebastien Viollet<sup>4</sup>, Gael Cristofari<sup>4</sup>, Sara R.  
6                                           Heras<sup>1,2\*</sup>

7

8           <sup>1</sup>GENYO, Centre for Genomics and Oncological Research: Pfizer/University of  
9           Granada/Andalusian Regional Government. PTS Granada, Av. de la Ilustración, 114, 18016  
10           Granada, Spain.

11           <sup>2</sup>Dept. Biochemistry and Molecular Biology II, Faculty of Pharmacy, University of Granada,  
12           Campus Universitario de Cartuja, 18071 Granada, Spain

13           <sup>3</sup>Dept. of Computer Languages and Systems, Universitat Jaume I, Castellón de la Plana, 12071,  
14           Spain.

15           <sup>4</sup>University Cote d'Azur, Inserm, CNRS, IRCAN, Nice, France

16           <sup>5</sup>These authors contributed equally to this work.

17           \*Correspondence should be addressed to S.R.H ([sara.rodriguez@genyo.es](mailto:sara.rodriguez@genyo.es)).

18

19 **ABSTRACT**

20 **Nearly half of the human genome is made of transposable elements (TEs)**  
21 **whose activity continues to impact its structure and function. Among them,**  
22 **Long INterspersed Element class 1 (LINE-1 or L1) elements are the only**  
23 **autonomously active TEs in humans. L1s are expressed and mobilized in**  
24 **different cancers, generating mutagenic insertions that could affect tumor's**  
25 **malignancy. Tumor suppressor microRNAs are ~22nt RNAs that post-**  
26 **transcriptionally regulate oncogene expression and are frequently**  
27 **downregulated in cancer. Here we explore whether they also influence L1**  
28 **mobilization. We found that downregulation of let-7 correlates with**  
29 **accumulation of L1 insertions in human lung cancer. Furthermore, we**  
30 **demonstrate that let-7 binds to the L1 mRNA and impairs the translation of the**  
31 **second L1-encoded protein, ORF2p, reducing its mobilization. Overall, our**  
32 **data uncover a new role for let-7, one of the most relevant microRNAs, which**  
33 **is to maintain somatic genome integrity by restricting L1 retrotransposition.**

34

35

36 Transposable elements (TEs) account for nearly half of the human genome<sup>1</sup>.  
37 However, the only TE that remains autonomously active nowadays is a non-  
38 Long Terminal Repeat (LTR) retrotransposon known as Long INterspersed  
39 Element class 1 (LINE-1 or L1), whose mobilization continues to impact our  
40 genome<sup>2</sup>. LINE-1s comprise >20% of our DNA<sup>3</sup> but only about 80-100 of the  
41 ~500,000 L1 copies present in the average human genome are full-length  
42 elements that retain the ability to mobilize and are thus called  
43 Retrotransposition-Competent L1s (RC-L1s)<sup>4</sup>. RC-L1s belong to the human-

44 specific L1Hs subfamily, are 6kb long and encode two proteins (L1-ORF1p and  
45 L1-ORF2p) that are indispensable for retrotransposition<sup>5</sup>. However, ORF2p is  
46 expressed at a significantly lower level than ORF1p<sup>6,7</sup>, and these differences are  
47 thought to be controlled at the level of translation<sup>8</sup>. L1-ORF1p is a 40kDa RNA  
48 binding protein with nucleic acid chaperone activity<sup>9,10</sup>, whereas L1-ORF2p is a  
49 150 kDa protein with Endonuclease (EN) and Reverse Transcriptase (RT)  
50 activities<sup>11,12</sup>. RC-L1s mobilize by a 'copy-and-paste' mechanism, involving  
51 reverse transcription of an RNA intermediate and insertion of its cDNA copy at  
52 a new site in the genome (reviewed in <sup>2</sup>). Briefly, retrotransposition starts with  
53 the transcription of a full-length RC-L1 bicistronic mRNA, which is exported to  
54 the cytoplasm and translated, giving rise to L1-ORF1p and L1-ORF2p that bind  
55 preferentially to the same L1 mRNA to form a ribonucleoparticle (RNP)<sup>13</sup>. The  
56 RNP gains access to the nucleus where retrotransposition occurs by a  
57 mechanism known as Target Primed Reverse Transcription (TPRT)<sup>14,15</sup>. During  
58 TPRT, the endonuclease activity of L1-ORF2p nicks the genomic DNA, and its  
59 reverse transcriptase activity uses the L1 mRNA as a template to generate a new  
60 copy of the element in a different genomic location. L1 can target all regions of  
61 the genome, but integration is locally dictated by the presence of a consensus  
62 sequence 5'-A/TTTT-3', which is recognized by L1 endonuclease activity and  
63 allows annealing of L1 mRNA poly(A) to the target DNA<sup>16-18</sup>. Other non-  
64 autonomous retrotransposons such as Alu and SINE-R/VNTR/Alu (SVA) may  
65 hijack the L1-encoded proteins and be mobilized in trans<sup>19,20</sup>. Furthermore, L1-

66 encoded proteins can sporadically generate pseudogenes using cellular mRNAs  
67 as templates <sup>21</sup>.

68 TEs can affect genome stability in several ways, including the accumulation of  
69 insertions and rearrangements<sup>2,22</sup>. Genomic alterations caused by L1 activity  
70 have resulted in several human disorders<sup>23</sup>. Among these alterations, new L1  
71 insertions can disrupt a gene unit, induce changes in splicing patterns, or  
72 interfere with transcription (reviewed in <sup>2</sup> and <sup>23</sup>). Remarkably, new L1  
73 insertions accumulate not only during early embryogenesis and in the germ  
74 line, being transmitted to the next generation<sup>24</sup>, but also in cancer cells, which  
75 are characterized by genome instability<sup>25-36</sup> (thoroughly reviewed recently in  
76 <sup>37,38</sup>). In fact, L1s are highly expressed and mobilized in a wide range of human  
77 epithelial cancers<sup>26,27</sup>, and high levels of L1 mobilization are found in lung and  
78 colorectal cancers<sup>26,32</sup>. Interestingly, several reports have shown that somatic L1  
79 insertions can drive tumorigenesis and may even have initiated the tumor in  
80 normal cells<sup>26,28,30,31,39</sup>. Transcriptional control through methylation of the L1  
81 promoter is one of the main defence mechanisms against L1 activity<sup>40,41</sup>, and it  
82 has been demonstrated that hypomethylation of specific RC-L1s is associated  
83 with retrotransposition in early tumorigenesis<sup>30,32</sup>. However, additional post-  
84 transcriptional mechanisms that silence and reactivate L1 in somatic normal  
85 and tumor cells are not completely understood yet.

86 MicroRNAs (miRNAs) are small RNAs that are loaded into the Argonaute  
87 (AGO) proteins to form the RNA-Induced Silencing Complex (RISC) and post-  
88 transcriptionally repress gene expression<sup>42,43</sup>. Hundreds of *bona fide* miRNAs  
89 exist in humans and each of them is predicted to target many mRNAs<sup>44</sup>.  
90 Therefore, miRNAs could be influencing essentially all human developmental,  
91 physiological and pathological processes<sup>42</sup>. In particular, overall miRNA  
92 dysregulation has been described in cancer<sup>45,46</sup>. Interestingly, it was previously  
93 shown that mouse embryonic stem cells (mESCs) lacking mature miRNAs  
94 (DGCR8 or Dicer knockout) accumulate LINE-1 mRNA<sup>47-49</sup>. Whereas the  
95 increase in LINE-1 mRNA levels in the absence of DGCR8 was attributed to  
96 reduced non-canonical functions of the Microprocessor, which cleaves stem-  
97 loops present in L1 elements<sup>48</sup>, it remains possible that miRNAs regulate L1  
98 expression levels. Consistently, a previous study reported that miR-128  
99 represses engineered L1 retrotransposition in cultured cells<sup>50</sup>. Thus, we  
100 hypothesized that some miRNAs could control L1 retrotransposition and that  
101 their misexpression in tumors could contribute to increased LINE-1  
102 mobilization.

103 To test this possibility, we first analyzed whole genome sequencing data from a  
104 panel of human lung tumor/normal pairs and miRNA expression data from the  
105 same tumor samples. Notably, we found that samples containing tumor-specific  
106 L1 insertions express reduced levels of several members of the tumor

107 suppressor miRNA let-7 family, suggesting that this miRNA could influence  
108 retrotransposition *in vivo*. Indeed, we further demonstrate that let-7 binds  
109 directly to the L1-mRNA impairing L1-ORF2p translation, and reduces L1  
110 retrotransposition in cultured tumor cells. Altogether, our results uncover a  
111 new role for let-7 in maintaining genome integrity and provide mechanistic  
112 insight into how downregulation of let-7 miRNAs in tumors may unleash L1  
113 activity, causing genome instability and driving tumor genome evolution.

## 114 RESULTS

### 115 Downregulation of let-7 and miRNA-34a correlates with increased somatic L1 116 retrotransposition in human lung tumor samples

117 To identify potential miRNAs whose deregulation could produce a change in  
118 L1 retrotransposition in epithelial tumors, we focused on Non Small Cell Lung  
119 Cancer samples (NSCLC) from The Cancer Genome Atlas (TCGA), as  
120 endogenous L1s are known to retrotranspose efficiently in this tumor type<sup>26,32,36</sup>.  
121 We selected all the samples (45 patients) for which whole genome sequencing  
122 data from tumor and matched normal lung tissue, together with tumor miRNA-  
123 seq data, were available. We computationally identified tumor-specific somatic  
124 L1 retrotransposon insertions from whole-genome sequencing data using the  
125 MELT software<sup>51</sup>. Briefly, MELT detects Mobile Element Insertions (MEIs) by  
126 searching for discordant reads pairs and split reads that are enriched at genome  
127 positions containing new, non-referenced insertions<sup>51</sup>. First, to rule out possible  
128 biases produced by different coverage or quality of sample pairs, we analyzed  
129 the polymorphic germline L1 insertions identified by MELT. We selected the  
130 samples in which the number of polymorphic L1 insertions found in  
131 tumor/normal DNA pairs was similar and at least 63% of them were common to  
132 both DNAs, a total of 41 samples (**Supplementary Table I**). After exclusion of  
133 polymorphic L1s<sup>52</sup>, we detected 413 putative *de novo* L1 insertions specific to  
134 cancer samples, which were absent in matched normal DNA from the same

135 patient (**Supplementary Table I** and **Supplementary Table II**). The low  
136 number of putative *de novo* insertions found in normal tissue but not in tumor  
137 tissue (3 in the 41 samples), expected to be zero, confirmed the specificity of the  
138 method. Consistent with previous studies, 409 of the 413 tumor specific *de novo*  
139 L1 insertions identified here occurred in intronic and intergenic regions  
140 (**Supplementary Table II**), likely representing passenger mutations<sup>37,38</sup>.

141 To evaluate a possible correlation between L1 retrotransposition in lung cancer  
142 and miRNA expression, tumor samples were divided into two groups based on  
143 the presence ( $\geq 1$ ) or absence (0) of tumor-specific L1 insertions (**Fig. 1a**). Using  
144 available miRNA-seq data across these samples in TCGA, we analyzed the  
145 expression of 26 miRNAs that have been previously associated with the  
146 development and/or progression of lung cancer, such as the let-7 family, the  
147 miR-34 family, or the miR-17-92 cluster<sup>53</sup> (**Fig. 1b**). Interestingly, we found that  
148 several members of the tumor suppressor let-7 family (let-7a, let-7e and let-7f)  
149 were significantly downregulated in the samples with  $\geq 1$  tumor-specific L1  
150 insertions upon multiple t-testing adjusted with  $FDR < 0.01$  (**Fig. 1b** and  
151 **Supplementary Table III**). This correlation was also found for let-7a and let-7f  
152 using a different statistical analysis (Rank-sum test, **Supplementary Table IV**).  
153 Although all the members of the let-7 family have a similar mature sequence,  
154 and could potentially bind to the same RNA targets, their genomic location and  
155 timing of expression is markedly different<sup>54</sup>. Interestingly, reduced expression



156 of let-7a and let-7f has been observed in lung cancer samples<sup>55,56</sup>. Additionally,  
157 miR-34a, another tumor suppressor miRNA<sup>57</sup>, was also significantly reduced in  
158 samples with tumor-specific L1 insertions (**Fig. 1b and Suppl. Table III**). As a  
159 control, analysis was repeated after L1 insertion counts were randomly  
160 reassigned to each sample. No significant correlation was found in any case  
161 (one example is shown in **Supplementary Fig. 1a and Supplementary Table**  
162 **V**). Notably, the differential expression of let-7a, let-7e, let-7f and miR-34a was  
163 also significant in a more restrictive analysis where all the miRNAs expressed in  
164 lung tumor samples (89 miRNAs) were considered (**Supplementary Table VI**).  
165 Thus, even though we cannot rule out a possible bias in the analysis due to  
166 sample variability and the limited number of cases available, these data suggest  
167 that let-7 and miR-34a might control the accumulation of new L1 insertions in  
168 human lung cancer samples. Next, we used SQuIRE (Software for Quantifying  
169 Interspersed Repeat Elements)<sup>58</sup> to quantify L1Hs expression in RNA-seq data  
170 from these tumor samples, available in TCGA. As expected, L1Hs RNA levels  
171 were significantly increased in samples with tumor-specific L1 insertions  
172 (**Supplementary Fig. 1b**). However, L1Hs expression negatively correlates with  
173 miR-34a but not with let-7 expression (**Supplementary Fig. 1b**).

174 To further corroborate our results, we analyzed the correlation between miRNA  
175 expression and the number of tumor-specific L1 insertions identified by  
176 Helman and collaborators in a group of 46 lung tumor samples using Transpo-

177 seq framework<sup>26</sup> (13 of them were also included in the previous analysis using  
178 MELT). Remarkably, the expression levels of let-7 family members (let-7a and  
179 let-7e) and miR-34a were again significantly reduced in those tumors containing  
180 tumor-specific L1 insertions when the 26 miRNAs related to lung cancer were  
181 analyzed (**Supplementary Figure 1c** and **Supplementary Table VII**) as well as  
182 when all the miRNAs expressed in lung were included (**Supplementary Table**  
183 **VIII**). Notably, the same analysis with the number of insertions randomly  
184 reassigned to each sample did not show any significant correlation with  
185 miRNA expression (**Supplementary Figure 1d** and **Supplementary Table IX**).  
186 Lastly, the same analysis was performed using 36 breast cancer samples which  
187 contain a notably smaller number of tumor-specific L1 insertions per sample as  
188 determined by Transpo-Seq<sup>26</sup>. No significant correlation was found for any of  
189 the 26 miRNAs related to lung cancer (**Supplementary Figure 1e** and  
190 **Supplementary Table X**) suggesting that the contribution of let-7 and mir-34a  
191 to L1 mobilization could be specific to some tumor types.

192 Overall, these results suggest that a downregulation of let-7 and/or miR-34  
193 expression can influence the accumulation of tumor-specific L1 insertions in  
194 lung cancer.

### 195 **Let-7 negatively regulates human LINE-1 retrotransposition *in vitro***

196 To investigate whether there is a causal relationship between the variation in  
197 let-7 and miR-34 expression levels and the accumulation of L1 insertions in

198 tumors, we tested the effect of these miRNAs on L1 mobilization using the  
199 sRNA/L1 retrotransposition assay, recently developed in our lab<sup>59</sup>. This protocol  
200 combines the previously described cell culture-based LINE-1 retrotransposition  
201 reporter assay (reviewed in <sup>2</sup>) with microRNA mimics or inhibitors. Briefly, in  
202 this assay, cells are transfected with a plasmid containing an RC-L1 tagged with  
203 a reporter cassette (**Fig. 2a**). This cassette consists of a reporter gene (REP) in  
204 antisense orientation relative to the L1, equipped with its own promoter and  
205 polyadenylation signal, but interrupted by an intron located in the same  
206 transcriptional orientation as L1. Thus, a functional reporter can only be  
207 produced after a successful round of retrotransposition (**Fig. 2a**). For this assay,  
208 we used cultured HeLa cells which express high levels of let-7a and almost  
209 undetectable levels of miR-34a as analyzed by RT-qPCR (**Supplementary Fig.**  
210 **2a**). We next analyzed L1 activity upon overexpressing let-7a and miR-34a,  
211 using transfected synthetic miRNA mimics and a neomycin-resistance based  
212 retrotransposition assay (using plasmid JM101/L1.3, **Fig. 2b** and Methods). As a  
213 control, we performed a clonability assay co-transfecting the miRNA mimics  
214 with a plasmid encoding a constitutively-expressed neomycin resistance gene  
215 (pU6iNeo) to rule out possible effects of miRNA overexpression on cell growth  
216 (**Fig. 2b**). In agreement with the above observation in lung tumor samples, we  
217 reproducibly detected a significant decrease in L1 retrotransposition upon  
218 overexpression of let-7a in HeLa cells without affecting the clonability of the  
219 cells (**Fig. 2b**, top panel). Furthermore, as expected, overexpression of different

220 let-7 family members also reduced L1 retrotransposition (e.g. let-7b in  
221 **Supplementary Fig. 2b**). Strikingly, overexpression of miR-34 did not affect L1  
222 mobilization or cell clonability in this assay (**Fig. 2b**, bottom panel). Similarly,  
223 let-7 overexpression inhibits L1 retrotransposition in HEK293T cells, which  
224 express lower endogenous levels of this miRNA as compared to HeLa cells  
225 (**Supplementary Fig. 2a**). We used a dual-luciferase reporter vector containing a  
226 different RC-L1, L1RP (pYX014, **Supplementary Fig. 2c**). This plasmid uses  
227 Firefly luciferase as retrotransposition indicator and encodes a Renilla luciferase  
228 in the backbone to normalize for transfection efficiency (**Supplementary Fig.**  
229 **2c**). Notably, we observed a consistent decrease in L1 retrotransposition upon  
230 co-transfection of the let-7 mimic in HEK293T cells [measured as the relative  
231 luminescence ratio (L1-Fluc/Rluc)] (**Supplementary Fig. 2c**). As expected, an  
232 inactive L1RP containing two missense mutations in the ORF1-encoded protein  
233 did not show luciferase activity (plasmid pYX15, **Supplementary Fig. 2c**).  
234 Considering that miRNAs downregulate the expression of their targets, the  
235 decrease of L1 mobilization upon let-7 overexpression suggests that L1 mRNA  
236 could be a *bona fide* let-7 target. Conversely, miR-34 overexpression in HEK293T  
237 cells, where the endogenous levels are slightly higher than in HeLa cells  
238 (**Supplementary Fig. 2a**), led to an increase in L1 retrotransposition using the  
239 dual luciferase reporter vector pYX014 (**Supplementary Fig. 2d**). The different  
240 effects observed for miR-34 overexpression in HeLa (**Fig. 2b**) and HEK293T

241 cells (**Supplementary Fig. 2d**) suggest a potential indirect and cell-type specific  
242 effect of miR-34 on L1 mobilization.

243 To further investigate the role of let-7 on the control of L1 mobilization, we  
244 performed another panel of cell culture-based retrotransposition assays using a  
245 hairpin inhibitor to decrease intracellular let-7 levels. Although the inhibitor  
246 used was designed against let-7a, it has been shown to cross-react with other  
247 members of the family<sup>60</sup>. Consistent with our previous results, we found that  
248 depletion of let-7 in HeLa cells led to a two-fold increase in L1  
249 retrotransposition without affecting the clonability of the cells using the  
250 neomycin-resistance cassette described above (**Fig. 2c**). A similar increase in L1  
251 retrotransposition was observed in HEK293T cells upon let-7 depletion using an  
252 EGFP-based reporter cassette and a different human RC-L1, LRE3 (plasmid 99-  
253 UB-LRE3, **Supplementary Fig. 2e**). Furthermore, we confirmed that let-7 knock-  
254 down increased L1 retrotransposition in HEK293T using the luciferase reporter  
255 vectors pYX014 and pYX017 (**Supplementary Fig. 2f**). While both contain the  
256 same active human L1, L1RP, in pYX014 it is transcribed from the native  
257 promoter in the 5'UTR whereas in pYX017, it is highly transcribed from a CAG  
258 promoter.

259 Lastly, since our bioinformatic analysis showed an inverse correlation between  
260 let-7 expression and accumulation of L1 insertions in human lung tumor  
261 samples, we analyzed whether let-7 could regulate L1 retrotransposition in lung

262 cancer cells. To do that, we performed the luciferase-based retrotransposition  
263 assay in two lung cancer cell lines with significantly different endogenous levels  
264 of let-7, A549 and SK-MES-1 (**Supplementary Fig. 2g**). Interestingly, we  
265 observed that, in both cell lines, depletion of let-7 increased L1  
266 retrotransposition by 2.5 times on average (**Fig. 2d**). Altogether, these data  
267 indicate that let-7 negatively regulates human L1 mobilization in a variety of  
268 cancer cell lines.

### 269 **Let-7 binds directly to the coding sequence of L1 mRNA**

270 The aforementioned regulation could occur either by a direct interaction  
271 between let-7-guided RISC and L1 mRNAs, or by an indirect effect, since let-7  
272 could be regulating any host factor involved in the multiple steps of the  
273 retrotransposition cycle<sup>61</sup> or in L1 control<sup>62</sup>. Since a direct effect would be  
274 sequence-dependent, we performed a neomycin-resistance based  
275 retrotransposition assays in HeLa cells using non-human active LINEs, that  
276 differ in sequence from the human L1 but use the same target-primed reverse  
277 transcription mechanism for mobilization. Briefly, we used mouse TG<sub>F</sub>21 (L1G<sub>F</sub>  
278 subfamily) and zebrafish L2-1 and L2-2 (L2 clade). Structures of the different  
279 LINEs are shown in the left panel of **Fig. 3a**, and constructs are described in the  
280 Methods section. Interestingly, we observed that only human L1 mobilization  
281 was significantly affected by either the inhibition (**Fig. 3a**) or the overexpression

282 (Supplementary Fig. 3a) of let-7. These results suggested a direct, sequence-  
283 dependent interaction between let-7 and human L1 mRNA.

284 It is well established that miRNAs mostly bind their target mRNAs in their  
285 3'UTRs<sup>42</sup>, although 5'UTR and coding sequence binding sites have been  
286 described and validated<sup>63-65</sup>. Thus, to find out where the putative let-7 binding  
287 site was located in L1 mRNA, we performed the same retrotransposition assays  
288 but using an engineered human RC-L1 (L1.3) lacking either the 5' or the 3'UTR  
289 (Fig. 3b and Supplementary Fig. 3b). Notably, the effect of let-7 depletion or  
290 overexpression in engineered L1 mobilization was not abolished or reduced by  
291 the absence of either 5' or 3' UTR, suggesting that let-7 interacts with the coding  
292 sequence of human L1 mRNA (Fig. 3b and Supplementary Fig. 3b).

293 As a proof of concept, we investigated whether L1 mRNAs were bound directly  
294 by different human Argonaute (AGO) proteins, the main components of the  
295 RISC complex: AGO2, the only one with cleavage activity, and AGO1,  
296 specifically associated to miRNA function<sup>66</sup>. Interestingly, we observed by co-  
297 immunoprecipitation in HEK 293T cells that overexpressed FLAG-tagged  
298 AGO2 and AGO1 proteins interact with endogenous L1-ORF1p in an RNA-  
299 dependent manner (Supplementary Fig. 3c). This result suggests that L1  
300 mRNA could be recognized by miRNAs and bound directly by Argonaute  
301 proteins. Consistently, it has previously been described that L1-ORF1p often

302 aggregates in cytoplasmic foci and colocalizes with L1 mRNA and AGO2  
303 protein<sup>67,68</sup>.

304 We further analyzed whether let-7 guides the RISC complex to L1 mRNAs by  
305 RNA-Immunoprecipitation (RIP) assay. For this, we used a human embryonic  
306 teratocarcinoma cell line (PA-1), characterized by high levels of endogenous  
307 LINE-1 mRNA and L1-ORF1p<sup>69</sup> and very low levels of let-7 miRNAs  
308 (**Supplementary Fig. 2g**). Briefly, we overexpressed FLAG-tagged AGO2,  
309 pulled it down, purified the endogenous bound RNAs, and analyzed them by  
310 RT-qPCR (**Fig. 3c**). We reasoned that if let-7 can bind L1 mRNA, let-7  
311 overexpression should lead to an increase in the abundance of endogenous L1  
312 mRNAs associated to AGO2. Strikingly, we observed an enrichment in the  
313 amount of L1 mRNA bound to AGO2 upon overexpression of let-7 resembling  
314 the behaviour of HMGA2 mRNA (**Fig. 3d**), a well-known target of let-7<sup>70</sup>. In  
315 contrast, none of the negative controls used, GAPDH and actin mRNAs, were  
316 enriched in the immunoprecipitation (**Fig. 3d**). Thus, these data suggest that let-  
317 7 guides Argonaute proteins to L1 mRNA, and that this interaction occurs  
318 within the L1 coding sequence.

### 319 **A functional let-7 binding site is located in L1-ORF2**

320 We next set out to predict and validate putative let-7 binding sites within the  
321 coding sequence of the L1 mRNA. We used two different software available  
322 online: miRanda<sup>71</sup> and RNA22<sup>72</sup>. The best predicted binding site for let-7 family



323 by each method were located in positions 2650-2671 (bs1) and 4596-4616 (bs2),  
324 respectively, in the consensus L1Hs sequence (top panel, **Supplementary Fig.**  
325 **4a**). In order to validate them, five tandem copies of each binding site (bs) were  
326 cloned in the 3'UTR region of the Renilla luciferase (Rluc) gene in the  
327 psiCHECK-2 vector, which also encodes a Firefly luciferase (Fluc) gene to  
328 correct for transfection efficiency (left panel, **Fig. 4b**). As controls, an unrelated  
329 sequence of the same length and a sequence with perfect complementarity to  
330 let-7 were cloned (no bs and perfect bs, respectively). Those constructs were co-  
331 transfected with let-7 mimic in HEK293T cells. The reporter constructs  
332 containing the RNA22-predicted binding site (bs2) and the positive control  
333 (perfect bs), but not the one with the miRanda-predicted binding site (bs1) or  
334 the negative control (no bs), showed a reduction of the relative luciferase ratio  
335 (RLuc/FLuc) upon let-7 overexpression (bottom panel, **Supplementary Fig.4a**).  
336 A deeper analysis of the residues in this region interacting with let-7 microRNA  
337 using RNAhybrids software<sup>73</sup> suggests that the functional 'bs2' is located  
338 within the coding sequence of L1-ORF2 (position 4587-4610 in L1.3, a  
339 commonly used human RC-L1, accession code # L19088.1<sup>74</sup>), between the RT  
340 and Cysteine-rich domains of this protein (**Fig. 4a, left panel**). Importantly, it is  
341 predicted to form a duplex with let-7 miRNA consisting of seven Watson–Crick  
342 pairings at positions 3-9 followed by an adenine at the mRNA nucleotide  
343 corresponding to the first nucleotide position of the miRNA, resembling a  
344 previously described functional noncanonical binding site termed offset 7-mer

345 (Fig. 4a)<sup>75</sup>. Altogether, these results suggest that this refined binding site,  
346 hereafter referred to as 'bs2rh' is a *bona fide* let-7 binding site. To further validate  
347 this binding site ('bs2rh') we generated a mutant sequence ('bs2rhmut', see Fig.  
348 4b, left panel). Mutations introduced in 'bs2rh' are predicted to severely impede  
349 the duplex formation between L1 mRNA and let-7 (Supplementary Fig. 4b).  
350 Accordingly, the mutated sequence rescued the luciferase activity upon  
351 overexpression of let-7 (bs2rh vs bs2rhmut, Fig. 4b).

352 To further corroborate the functionality of 'bs2rh' in the context of  
353 retrotransposition, we generated an allele mutated RC-L1 construct containing  
354 a mutated 'bs2rh' site (we introduced the same mutation described above,  
355 construct JM101/bs2rhmutL1.3, Fig. 4c). Intriguingly, the validated 'bs2rh' site is  
356 conserved through primate L1 evolution, being present in L1PA5 elements and  
357 containing a few mutations in older L1 subfamilies (Supplementary Fig. 4c).  
358 Accordingly, the introduction of the mutation contained in the 'bs2rhmut'  
359 sequence, which entails an amino acid change (P to G) in L1-ORF2p, leads to a  
360 reduction in RC-L1 mobility (Fig. 4d, right side graph). We observed that  
361 'bs2rhmut' L1.3 retrotransposition was less affected by let-7 inhibition than  
362 wild-type L1.3 (Fig. 4d). Interestingly, this binding site is absent in zebrafish  
363 LINEs and relatively low conserved in mouse RC-L1s (Supplementary Fig. 4d)  
364 in agreement with the specific let-7 effect on human L1 retrotransposition  
365 showed above (Fig. 3a and Supplementary Fig. 3a). However, the fact that

366 mutating this binding site reduced but not abolished the effect of let-7 in L1  
367 mobilization suggest that additional mechanisms mediated by let-7 may work  
368 to restrict human L1 retrotransposition. Overall, these results suggest that there  
369 is at least a functional let-7 binding site in the ORF2 region of human L1 mRNA.

### 370 **Let-7 impairs L1-ORF2p translation**

371 The above experiments identified a functional let-7 binding site in L1-ORF2p,  
372 and we next analyzed the functional consequences of let-7 binding to L1  
373 mRNA. Since miRNAs can induce mRNA degradation<sup>43</sup>, we analyzed the levels  
374 of endogenous L1 mRNAs upon let-7 overexpression in HEK293T cells by RT-  
375 qPCR. We found no significant changes in L1 mRNA levels at 24 and 48 hours  
376 after let-7 overexpression, whereas those of other canonical let-7 targets (DICER  
377 and HMGA2) were significantly reduced (**Fig. 5a**). Similarly, L1 mRNA levels  
378 were not decreased upon let-7 overexpression (**Supplementary Fig. 5a**) or  
379 increased upon let-7 depletion (**Supplementary Fig. 5b**) when L1 was  
380 overexpressed in HEK293T cells. Thus, these data suggest that let-7 expression  
381 does not trigger L1 mRNA degradation.

382 The other main effect of miRNAs on their target mRNAs is interference with  
383 protein translation<sup>76</sup>, so we analyzed the levels of endogenous L1-ORF1p upon  
384 modulation of let-7 levels in HEK293T cells. We found significant changes in  
385 HMGA2 but not in ORF1p expression upon let-7 overexpression (**Fig. 5b**) or  
386 depletion (**Supplementary Fig. 5c**). We corroborated this results in a stable

387 HEK293T cell line that constitutively overexpresses a T7-tagged L1-ORF1p  
388 (from L1.3, and using a CMV promoter) (**Supplementary Fig. 5d**).

389 We next analyzed changes in L1-ORF2p levels. The translation of ORF2p occurs  
390 by a highly inefficient unconventional termination/reinitiation mechanism that,  
391 although could produce as few as one L1-ORF2p molecule per L1 mRNA<sup>8</sup>, is  
392 enough to support efficient retrotransposition<sup>5,8</sup>. Consequently, it is technically  
393 challenging to detect endogenous L1-ORF2p. Thus, to study L1-ORF2p levels  
394 upon let-7 modulation, we generated a monocistronic construct expressing  
395 3xFLAG-tagged ORF2p from a CMV promoter (L1-ORF2p from L1.3), pSA500.

396 Strikingly, we observed an increase in ORF2p upon let-7 depletion and a  
397 decrease upon let-7 overexpression in HeLa cells (**Fig. 5c**) resembling the effect  
398 on DICER protein levels, a well described target of let-7 with several 8-mer  
399 sites<sup>63</sup> (**Fig. 5c**). To rule out that differences in L1-ORF2p expression were due to  
400 different transfection efficiencies, we took a fraction of each sample, extracted  
401 DNA, and quantified plasmid levels by qPCR using primers targeting the CMV  
402 promoter driving ORF2 expression or the EBNA-1 sequence in the plasmid  
403 backbone. We did not observe any significant differences in the amount of  
404 plasmid co-transfected with let-7 mimic (**Supplementary Fig. 5e**) or let-7  
405 inhibitor (**Supplementary Fig. 5f**). Consistent with the data presented above,  
406 the difference at protein level neither correlates with changes in the levels of  
407 exogenous L1 ORF2-FLAG RNA (L1-ORF2-F RNA), as opposed to DICER

408 whose mRNA is also reduced (bottom panel, **Fig. 5c**). These data suggest that  
409 the differences in ORF2p levels are not due to variations in transfection or  
410 mRNA accumulation but to an effect of let-7 on ORF2-F translation.

411 To understand whether let-7 mediated translational repression of ORF2p is due  
412 to the specific interactions with the offset 7-mer site or to its location within the  
413 coding sequence, we generated three variants of pSA500 in which we  
414 introduced different sequences in its 3'UTR : a scrambled sequence ('scrb'), the  
415 binding site ('bs2rh') and a modified bs2 that contains a canonical 8-mer site for  
416 let-7 ('8mer') (**Supplementary Fig. 5g**). We co-transfected all these constructs in  
417 HeLa cells with let-7 mimic. First, by RT-qPCR we observed that similar levels  
418 of transfection (measuring constitutive EBNA expression from the plasmid  
419 backbone, **Supplementary Fig. 5h**) and let-7 overexpression (measuring the  
420 effect on endogenous DICER, **Supplementary Fig. 5h**) were achieved. The  
421 levels of ORF2 mRNA were not significantly affected in any case, although we  
422 observed a tendency towards a reduction on the RNA levels upon placement of  
423 the binding site ('bs2rh') or the modified 8-mer binding site ('8mer') in the  
424 3'UTR (**Supplementary Fig. 5h**). Furthermore, western blot analysis showed  
425 that placement of 'bs2rh' sequence in the 3'UTR of pSA500 slightly enhanced  
426 the reduction of ORF2-F protein upon let-7 overexpression (**Supplementary**  
427 **Fig. 5i**), an effect that was more prominent when the canonical site ('8mer') was  
428 tested. In agreement with previous studies<sup>75</sup>, these results suggests that the

429 proficiency of 'bs2rh', a noncanonical offset 7mer site, is weaker than that of a  
430 canonical let-7 binding site when they are located in 3'UTR. Moreover, we  
431 cannot rule out that the translational repression mediated by both binding sites  
432 located in 3'UTR could be attributed to mRNA destabilization. Additionally,  
433 using site directed mutagenesis we introduced two point-mutations in the  
434 ORF2 coding region to transform the offset 7-mer into a canonical let-7 8-mer  
435 site, generating pSA500-ORF2-8mer (**Supplementary Fig. 5j**). We co-transfected  
436 this construct in HeLa cells with let-7 mimic. Interestingly, the 8-mer site within  
437 the ORF does not affect the levels of mRNA (**Supplementary Fig. 5k**) and leads  
438 to a decrease in the protein level similar to that observed above for 'bs2rh'  
439 (**Supplementary Fig. 5m**). Altogether, these results suggest that the  
440 translational repression mediated by bs2rh mainly depends on its location  
441 within the coding sequence, rather than on its non-canonical interaction.

442 To further characterize this effect, we next analyzed the impact of let-7 binding  
443 on L1-ORF2p translation in its natural context: a full-length bicistronic L1 RNA  
444 where L1-ORF2p is translated using the aforementioned  
445 termination/reinitiation mechanism<sup>8</sup>. In order to perform a more quantitative  
446 analysis, we combined the use of L1-encoded proteins with fluorescent tags and  
447 confocal microscopy or flow cytometry. Briefly, we generated a construct where  
448 L1-ORF1p and L1-ORF2p from a human L1.3 element were fused to EGFP and  
449 mCherry, respectively, at their C-terminus (plasmid pVan583, **Fig. 5d**). First, we

450 confirmed that ORF1p-GFP was expressed from this construct (**Supplementary**  
451 **Fig. 5n**) and that this tagged L1 was able to retrotranspose, although the  
452 addition of both florescent tags reduced its activity to ~30% of its untagged  
453 counterpart, JM101/L1.3 (**Supplementary Fig. 5o**). Next, by confocal  
454 microscopy we observed a reduction of L1-ORF2p-mCherry but not of L1-  
455 ORF1p-EGFP levels upon overexpression of let-7 in U2OS cells (**Supplementary**  
456 **Fig. 5q**). However, due to reduced transfection capacity of this construct  
457 (**Supplementary Fig. 5p**) and the inefficient translation of ORF2p-mCherry<sup>8</sup>, we  
458 obtained an insufficient number of double positive cells to enable a quantitative  
459 analysis by microscopy. Therefore, we turned to a more sensitive and  
460 quantitative approach: flow cytometry. We co-transfected pVan583 with let-7  
461 inhibitor in HeLa cells and analyzed EGFP<sup>+</sup> cells (i.e. >3500 cells per sample).  
462 Notably, we found that depleting let-7 led to an increase in the number of  
463 mCherry<sup>+</sup> cells in the EGFP<sup>+</sup> population suggesting an increase in the synthesis  
464 of L1-ORF2p-mCherry (**Fig. 5d**).

465 Altogether, our results suggest that let-7 impairs L1-ORF2p translation,  
466 potentially altering the ratio between L1-ORF1p and L1-ORF2p, which we  
467 speculate could unbalance L1-RNP formation (**Fig. 6**).

468

## 469 DISCUSSION

470 Many studies have linked LINE-1 retrotransposons to cancer<sup>25-32,34-36</sup>. In  
471 particular, L1 insertions have been found to occur at high frequencies in lung  
472 cancer genomes<sup>36</sup>. L1 is also associated with genomic instability, since new  
473 insertions can potentially cause splicing alterations, exon disruptions, indel  
474 mutations or large genomic rearrangements<sup>2,22,39</sup>. How these elements are  
475 silenced and derepressed in somatic human tissues, and how these processes  
476 impact tumorigenesis is an open question. DNA methylation of the L1 promoter  
477 is an important inhibitor of L1 activity<sup>40</sup>. In fact, a consistent correlation  
478 between the number of somatic L1 insertions in lung cancer and  
479 hypomethylation of L1 promoters has been shown, both at a global and at a  
480 locus specific level<sup>32,41</sup>. However, considering the high level of somatic L1  
481 activity in some of these patients, it is tempting to speculate that RC-L1s might  
482 also escape post-transcriptional restriction mechanisms<sup>47,77</sup>. On the other hand,  
483 among all tumor suppressor miRNAs, reduced let-7 expression occurs most  
484 frequently in cancer and typically correlates with poor prognosis<sup>78</sup>.  
485 Functionally, it is well known that a decrease in let-7 miRNAs leads to  
486 overexpression of their oncogenic targets such as MYC, RAS, HMGA2 among  
487 others<sup>54</sup>.  
488 Here we describe a new role for let-7 in controlling human L1 activity, which  
489 may contribute to its tumor suppressor function. First, we found a high



490 frequency of retrotransposition in NSCLC cancer, consistent with previous  
491 reports<sup>26,36</sup>. We further showed that human tumor samples with somatic L1  
492 insertions present reduced let-7 expression. Additionally, we demonstrated that  
493 the mobilization of full-length L1s in cultured cells can be negatively regulated  
494 by let-7 in a variety of cell lines including lung cancer cells. It is worth noting  
495 that the expression of another tumor suppressor miRNA, miR-34a, is also  
496 reduced in lung tumors with L1 activity and correlates negatively with L1Hs  
497 RNA levels. However, we did not observe a consistent effect of the latter on L1  
498 retrotransposition, under our experimental conditions. We speculate that mir-34  
499 could indirectly regulate L1 mobilization, targeting a member of the epigenetic  
500 regulatory network controlling expression of active L1s in our genome.

501 AGO proteins are the main effectors of miRNA-guided gene silencing<sup>79</sup>. Our  
502 AGO2 RNA immunoprecipitation assay and the use of engineered  
503 retrotransposition constructs lacking 3'UTR or 5'UTR suggest that let-7 is  
504 actually guiding AGO2 to the human L1 mRNA, and that its binding occurs in  
505 L1 coding sequence (CDS). In fact, we have demonstrated that ORF2 contains a  
506 noncanonical offset 7-mer let-7 binding site previously described as functional  
507 for microRNA targeting<sup>75</sup>. Although it is widely accepted that most binding  
508 sites are located in the 3'UTR of target mRNAs<sup>42</sup>, functional CDS binding sites  
509 for different miRNAs, including let-7, have also been described<sup>63,64,80</sup>.

510 Furthermore, we demonstrate that mutations in this binding site reduce, but not  
511 abolish, the effect of let-7 modulation on human L1 mobility. These results  
512 suggest that additional let-7 binding sites may exist within the coding sequence  
513 of human L1 mRNA, or that let-7 might have redundant indirect effects.  
514 However, we failed to validate functional let-7 binding sites in a different L1-  
515 ORF2 region ('bs1', identified by miRanda, **Supplementary Fig 4a**) or a region  
516 within L1-ORF1, identified using local alignments (data not shown). Thus,  
517 alternative approaches might be needed to obtain an unbiased view of  
518 functional let-7 binding sites in the L1 mRNA. Importantly, the binding site for  
519 the only miRNA targeting human LINE-1 mRNA described so far, miR-128, is  
520 also located in L1-ORF2<sup>50</sup>. We speculate that L1-ORF2, the largest and most  
521 conserved region among human LINE-1 subfamilies, is preferentially targeted  
522 by miRNAs because of the restricted space in the short L1 3'UTR, as it has been  
523 suggested by computational analysis for other mRNAs<sup>80</sup>. Accordingly, it was  
524 previously shown that knocking down the Microprocessor complex increased  
525 retrotransposition of a LINE-1 lacking the 3'UTR to the same extent as that of a  
526 full-length element<sup>48</sup>. Moreover, consistent with the mechanism suggested for  
527 gene silencing mediated by miRNA binding sites located in CDS<sup>64,81</sup>, we have  
528 demonstrated that let-7 impairs translation of L1 ORF2p without affecting  
529 mRNA stability. This conclusion is further supported by the fact that no  
530 correlation between the levels of let-7 and the expression of L1Hs RNA was  
531 observed in human lung tumor samples (**Supplementary Fig. 1b**). Interestingly,

532 the accumulation and translation of L1 an mRNA variant that have the natural  
533 'bs2rh' site substituted by a canonical let-7 8-mer site is similarly affected by let-  
534 7 overexpression as wild-type molecules (**Supplementary Fig. 5j-m**), suggesting  
535 that binding to the CDS region itself rather than the structure of the of base-  
536 pairing mediates translational repression, as previously described for other  
537 miRNA targeting CDS sites<sup>64</sup>.

538 Since L1-ORF2p is expressed at a very low level and is essential for L1  
539 retrotransposition<sup>5</sup>, a small reduction in the abundance of this protein could  
540 unbalance RNP formation reducing human L1 mobilization. Besides binding  
541 L1-ORF2 sequences, let-7 could also be regulating other mRNAs encoding  
542 proteins that positively impact human L1 retrotransposition<sup>62</sup>.

543 Let-7 is one of the most highly conserved families of miRNAs in the animal  
544 kingdom and is involved in multiple biological processes including  
545 differentiation, cell death, metabolism and cancer<sup>54</sup>. Here, all our findings  
546 support a model in which let-7 also guides the RISC to the mRNA of active L1s  
547 and impairs L1-ORF2p translation, altering the ratio between L1-ORF2p and  
548 L1-ORF1p in the L1-RNP and consequently reducing LINE-1 retrotransposition  
549 (**Fig. 6**). Mature let-7 is highly expressed in differentiated cells<sup>54</sup>, where different  
550 mechanisms repress L1 activity to avoid somatic L1 insertions<sup>41</sup>. We  
551 hypothesize that alterations in let-7 expression in human cancer lead to an  
552 increased mobilization of actively transcribed L1s and, moreover L1- mediated

553 retrotransposition of non-autonomous transposable elements like Alu and SVA

554 <sup>38</sup>, increasing genome instability and contributing to tumor progression.

## 555 ACKNOWLEDGEMENTS

556 The results shown here are in part based upon data generated by the TCGA  
557 Research Network: <https://cancer.gov/TCGA>. We thank Jose Luis Garcia-Perez  
558 (IGMM, Edinburgh, UK) for his valuable contribution to this project. We are  
559 also grateful to Marie-Jeanne Kempen, Jose Luis Garcia-Perez and Javier F.  
560 Caceres (IGMM, Edinburgh, UK) for comments and critical reading of the  
561 manuscript. We thank current members of the lab for useful discussions and  
562 methodological support. We are grateful to Drs. Jose Luis Garcia-Perez and  
563 John V. Moran (University of Michigan, US) for sharing numerous human L1  
564 vectors and cell lines; Aleksandra Helwak for valuable input at the beginning  
565 of this project, Wenfeng An (Dakota State University, USA) for sharing L1-Fluc  
566 plasmids; Aurelien Doucet for sharing pAD500; Norihiro Okada and Masaki  
567 Kajikawa (Tokyo Institute of Technology, Japan) for sharing tagged zebrafish  
568 LINE-2 plasmids; Haig Kazazian and John Goodier (John Hopkins, US) for  
569 sharing tagged mouse LINE-1 plasmids; Tomo-ichiro Miyoshi (Kyoto  
570 University) for sharing pJCC5ORF1T7-ORF3xFLAG plasmid; Pedro Medina  
571 (Genyo, Spain) for the lung cancer cell lines and technical advises; Oliver  
572 Weichenrieder (MPI Tubingen, Germany) for the polyclonal L1-ORF1p  
573 antibody; Ian Adams (IGMM, Edinburgh, UK) for Flp-In-293 cells expressing  
574 T7-tagged ORF1p; Verónica Ayllón (Genyo, Spain) for support with flow  
575 cytometry analysis; and Guillermo Barturen (Genyo, Spain) for support with

576 bioinformatic and statistical analysis. We also thank Jennifer Parra for technical  
577 support, and Genyo's flow cytometry unit. This article is part of the doctoral  
578 thesis of P.T.-R., a graduate student in the PhD programme of Biomedicine at  
579 the University of Granada, who was supported by MINECO (PEJ-2014-A-31985  
580 and SAF2015-71589-P). S.R.H. is funded by MINECO cofunding by European  
581 Regional Development Fund (SAF2015-71589-P), Ramón y Cajal (RYC-2016-  
582 21395) and a Career Integration Grant-Marie Curie (FP7-PEOPLE-2011-CIG-  
583 303812).

#### 584 **AUTHOR CONTRIBUTIONS**

585 S.R.H conceived and supervised the study. P.T.-R. and S.R.H designed and  
586 interpreted the experiments. P.T.-R. performed most of the experiments and  
587 data analysis. A.R.-R and G.P. provided all the bioinformatic analysis, including  
588 identification of somatic L1 insertions by MELT. P.T.-R and G.P. performed  
589 statistical analysis. A.R.-R was responsible for data management. L.S. provided  
590 technical support and performed experiments. S.A.-C. generated pSA500  
591 construct. S.V. and G. C. generated and characterized the pVan583 construct.  
592 P.T.-R., G.P. and S.R.H wrote the manuscript and all the authors contribute  
593 with a critical reading.

#### 594 **COMPETING INTERESTS**

595 The authors declare no competing interests.

596 **DATA AVAILABILITY**

597 Raw data used to generate the figures is available upon request. Sequencing  
598 data from tumor samples (used in Fig. 1 and Supplementary Fig. 1) is available  
599 in TCGA (<https://www.cancer.gov/tcga>).

600 **ADDITIONAL INFORMATION**

601 Correspondence and request for materials and raw data should be addressed to  
602 S.R.H. ([sara.rodriguez@genyo.es](mailto:sara.rodriguez@genyo.es))

603

## 604 **METHODS**

### 605 **Sequencing data**

606 Both WGS (aligned to HG19), miRNA expression quantification and RNAseq  
607 raw sequencing data files from TCGA were obtained from the Genomic Data  
608 Commons (GDC) Legacy Archive using the GDC Data Transfer Tool <sup>82</sup>. Cases of  
609 paired tumor-normal whole-genome sequencing (WGS) where tumor miRNAs  
610 expression data was available were retrieved for lung adenocarcinoma (LUAD)  
611 and lung squamous cell carcinoma (LUSC). High coverage (28-95x) WGS files  
612 aligned to hg19 from primary tumor and solid tissue normal samples, and  
613 miRNA gene quantification files from primary tumor were downloaded for  
614 LUAD (17 patients) and LUSC (28 patients).

### 615 **WGS analysis**

616 Putative somatic LINE-1 insertion calls for both normal tissue (NT) and primary  
617 tumor (PT) were obtained using MELT version 2.1.5 <sup>51</sup>. To discard possible  
618 sequencing artifacts, candidate somatic insertions were further filtered  
619 including calls supported with a minimum of three split-reads, with the highest  
620 accuracy assessment for breakpoint detection and passing all internal filters  
621 (MELT parameters ASSESS=5 and FILTER=PASS). Polymorphic insertion calls  
622 were found using a curated database included in TEBreak software  
623 (<https://github.com/adamewing/tebreak>) and excluded from final results.  
624 Several quality values were checked as a measure of filtering effects on original



625 (unfiltered) MELT results. First, somatic insertions found in NT alone, and NT  
626 and PT simultaneously were expected to be zero, and only a maximum of one  
627 insertion was allowed for these values. All samples passed this additional  
628 filtering.

629 Furthermore, polymorphic L1 insertions after MELT filtering were controlled,  
630 requiring that a similar number was found for PT and NT samples, and that this  
631 number were uncorrelated with sample coverage. Four samples in LUSC  
632 (TCGA-60-2695, TCGA-60-2722) and LUAD (TCGA-55-1594, TCGA-55-1596)  
633 were excluded from analysis because only a low number (<10%) of  
634 polymorphic insertions passed all filters.

635 Filtered LINE-1 calls were considered tumor somatic insertions if detected in  
636 primary tumor filtered results and absent in unfiltered solid normal tissue  
637 insertion set within a range of 100 bp.

### 638 **Correlation with miRNA expression**

639 Samples were divided in two groups depending on whether putative somatic  
640 insertions were or were not found in the primary tumor. Only miRNAs with  
641 medium-high expression (over 100 reads per million (RPM) mapped reads)  
642 were considered. For some of the analysis, expression of specific miRNAs  
643 known to be involved in the development and progression of lung cancer was  
644 analyzed.

645 For each miRNA, outliers were discarded (we considered outliers values  
646 deviating more than two standard deviation from the mean in each group).

647 Differentially expressed miRNAs were identified applying an unpaired two-  
648 tailed t test adjusted by FDR=1%. Results were confirmed using a rank-sum test.  
649 RPMs were normalized to the highest expression value of each miRNA to  
650 enable visualization of all miRNAs in the same graph. Tumor suppressor  
651 miRNAs and oncomiRs related to lung cancer used for this analysis were  
652 described in a recent revision<sup>53</sup>. As a control, L1 insertion numbers were  
653 randomly re-assigned to each sample and analysis was repeated. Moreover,  
654 analysis was done with L1 insertions determined by Helman and col. using  
655 Transpo-seq in lung and breast cancer samples obtained from TGCA as well<sup>26</sup>.  
656 Data processing and analysis was performed as described above.

#### 657 **L1Hs RNA expression**

658 To analyze global TE expression in RNA-seq experiments, we use SQuIRE<sup>58</sup>  
659 (Software for Quantifying Interspersed Repeat Elements). SQuIRE quantifies  
660 expression at the subfamily level. It outputs read counts and fragments per  
661 kilobase transcript per million reads FPKM. Linear correlation between  
662 L1HsRNA levels and microRNAs expression was calculated using Pearson  
663 Correlation Coefficient in GraphPad Prism 6.

664

#### 665 **Cell culture**

666 HEK293T, PA-1, HeLa and U2OS cells were originally obtained from ATCC and  
667 were provided by Drs Jose Luis Garcia-Perez (IGMM, Edinburgh, UK) and John  
668 V. Moran (University of Michigan, US). Lung cancer cell lines (A549, SK-MES-1)

669 were provided by Dr Pedro Medina (GENYO, Spain). Stable Flp-In-293 cells  
670 expressing T7-tagged L1-ORF1p were previously generated for a different  
671 study<sup>83</sup>.

672 HEK293T, HeLa, U2OS, A549 and SK-MES1 cells were cultured in high-glucose  
673 Dulbecco's Modified Eagle's Media (DMEM, Gibco) supplemented with  
674 GlutaMAX, 10% foetal bovine serum (FBS, Hyclone) and 100 U/mL penicilin-  
675 streptomycin (Invitrogen).

676 PA-1 cells were cultured in Minimal Essential Medium (MEM, Gibco)  
677 supplemented with GlutaMAX, 10% heat-inactivated FBS (Gibco), 100 U/mL  
678 penicilin-streptomycin (Invitrogen) and 0.1 mM Non-Essential Amino Acids  
679 (Gibco).

680 All cells were maintained in humidified incubators at 37°C with 5% CO<sub>2</sub>.

681 Absence of *Mycoplasma spp.* in cultured cells was confirmed at least once a  
682 month by a PCR-based assay (Minerva). Cell identity was confirmed at least  
683 once a year using STR genotype (at Lorgen, Granada).

#### 684 **Retrotransposition assays**

685 Modified versions of previously established L1 retrotransposition assays<sup>84-87</sup>  
686 were performed and are described below<sup>59</sup>. In the Neo/Blast assays, 2x10<sup>5</sup> HeLa  
687 JVM cells were plated in 6-well tissue culture plates. Within 24h, cells were co-  
688 transfected with 0.5-1µg of L1 plasmid and 60nM of let-7 mimic or 40nM of let-7

689 inhibitor and their respective controls scr and c- using Dharmafect DUO  
690 (Dharmacon) following manufacturer's instructions. For Neo assays, selection  
691 with 400  $\mu\text{g}/\text{mL}$  of G418 (Life) was started 48h post-transfection. For Blast  
692 assays, selection with 10  $\mu\text{g}/\text{mL}$  of blasticidin (Millipore) was started 5 days  
693 post-transfection. In both cases, medium was changed every two days. Between  
694 12 and 14 days after transfection, cells were washed with 1X PBS (Gibco), fixed  
695 (2% formaldehyde, 0.2% glutaraldehyde in 1X PBS), and stained with 0.5%  
696 crystal violet. Colonies were manually counted. The number of antibiotic-  
697 resistant colonies was used to quantify retrotransposition levels in cultured  
698 cells. Clonability assay was performed with 0.5  $\mu\text{g}$  pU6i Neo and  $1 \times 10^5$  HeLa  
699 cells<sup>88</sup>.

700 Luciferase retrotransposition assays were performed as described<sup>87</sup>. pYX014,  
701 pYX015 or pYX017 were co-transfected with 60nM of let-7 mimic or 40nM of let-  
702 7 inhibitor using Lipofectamine 2000 (Life). Luciferase activity was measured  
703 96h post-transfection using Dual-Luciferase Reporter Assay System (Promega),  
704 in a GloMax Luminometer (Promega).

705 EGFP-based retrotransposition assays were performed as described<sup>85</sup>. HEK293T  
706 cells were co-transfected with 99-UB-LRE3 and 40nM of let-7 inhibitor using  
707 Lipofectamine 2000 (Life). Retrotransposition (EGFP+ cells) was quantified 8  
708 days post-transfection in a FACS Canto cytometer (BD).

709 **MiRNAs mimics and inhibitors**

710 Let-7a/b mimic (C-300473-05 and C-300476-05), miR-34 mimic (C-300551-07),  
711 let-7a hairpin inhibitor (IH-300474-07), and their respective controls scr and c-  
712 (CN-002000-01-05 and IN-002005-01-05), were purchased from Dharmacon.  
713 They were resuspended in 1x siRNA Buffer (Thermo) to a working  
714 concentration of 20  $\mu$ M and kept at -80°C.

### 715 **RNA ImmunoPrecipitation (RIP)**

716  $2 \times 10^6$  PA-1 cells were transfected in 10cm tissue culture plates with 4  $\mu$ g of  
717 FLAG-AGO2 and 25 nM of scr/mimic let-7 using lipofectamine 2000 (Life).  
718 Transfection with pBSKS (an empty plasmid) was used as a negative control for  
719 the IP. 48h post-transfection, cells were washed with ice-cold 1xPBS, scraped  
720 and transferred to a 1.5 ml tube. After centrifugation at 1500rpm for 2 minutes,  
721 cells were resuspended in 200  $\mu$ l of cold resuspension buffer (20mM Tris  
722 (pH=7.5), 150mM NaCl, 1mM EDTA, 1mM EGTA) containing 1U/ $\mu$ L RNAsin  
723 Plus (Promega) and lysed adding 800  $\mu$ l of cold lysis buffer (1% Triton X-100,  
724 20mM Tris (pH=7.5), 150mM NaCl, 1mM EDTA, 1mM EGTA, 1mM  
725 phenylmethyl-sulfonyl fluoride (PMSF, Sigma), 1X cOmplete EDTA-free  
726 Protease Inhibitor cocktail (Roche) and incubating for 10-30 min on ice. After  
727 centrifugation (10000g for 10min at 4°C), 10  $\mu$ L of RQ1 Dnase (Promega) was  
728 added to the supernatant. Immunoprecipitation of FLAG-AGO2 was performed  
729 with Dynabeads Protein G (Life) and anti-FLAG M2 mouse (Sigma, F3165) for  
730 3h at 4°C with rotation. After five washes with lysis buffer, 10% of sample-

731 beads were used for protein extraction and western-blot, while 90% was  
732 incubated with RQ1 DNase for 30 min for later RNA extraction with Trizol LS  
733 (Ambion).

734

### 735 **Co-immunoprecipitation**

736 PA-1 cells were transfected with FLAG-AGO1/2, or an empty plasmid ('mock').  
737 48h post transfection, cells were lysed using lysis buffer and  
738 immunoprecipitation with anti-FLAG M2 mouse (Sigma, F3165) as it was  
739 described above. After the last wash with lysis buffer, the beads were treated  
740 with 100 µg/ml RNase A for 30 min. The western blot was performed with Anti-  
741 ORF1p (1:1000) provided by Dr. Oliver Weichenrieder, (Max-Planck, Germany)  
742 and subsequently, with anti-FLAG M2 mouse (Sigma, F3165).

### 743 **siCHECK luciferase assays**

744 In 24-well plates,  $1 \times 10^5$  HEK293T cells were seeded per well. Within 24h after  
745 seeding, cells were co-transfected with 10ng of each siCHECK plasmid and 50-  
746 80nM scr/let-7 mimic using Lipofectamine 2000 (Life). 24h post-transfection,  
747 Firefly and Renilla luciferase measurements were performed in a GloMax  
748 Luminometer (Promega) using Dual-Luciferase® Reporter Assay System  
749 (Promega), following manufacturer's instructions.

### 750 **Site-directed mutagenesis**

751 Binding site mutant 'bs2rhmut' was generated using an established protocol <sup>89</sup>.  
752 Briefly, 2 sequential PCRs were performed, using an active L1.3 as a template.  
753 First, two PCRs were performed using the following primers under standard  
754 conditions: Let7-ORF2PCRAFw/Let7-ORF2PCRa\_PG2rv and Let7-  
755 ORF2PCRaRv/Let7-ORF2PCRa\_PG2fw. The products of both reactions were  
756 purified, mixed in equal amounts, and used as a template for a second PCR  
757 using primers Let7-ORF2PCRAFw/ Let7-ORF2PCRaRv. Conditions for this PCR  
758 were: 95°C 5min, 10 cycles with (95°C 15s, 50°C 30s, 72°C 60s), 25 cycles with  
759 (95°C 15s, 55°C 30s, 72°C 60s), 72°C 10min. The resulting product contained the  
760 mutated sequence in ORF2. This product was purified and cloned into a  
761 plasmid containing an active L1 (pJCC5/L1.3) using EcoNI and BsaBI sites,  
762 generating pJCC5/bs2mutL1.3. This mutant L1 was then cloned into pJM101  
763 using NotI and BstZ17I sites, generating pJM101/bs2mutL1.3.

764 Binding site mutant 8-mer (pSA500 ORF2-8mer) was generated using the same  
765 protocol described above. For the first two PCRs, primers used were Let7-Bcl1-  
766 ORF2bs-PCRAFw/Let7-ORF2PCRa\_8mer and Let7-  
767 ORF2PCRaRv\_8mer/pCEP4\_Rv. The products of both reactions were purified,  
768 mixed in equal amounts, and used as a template for a second PCR using  
769 primers Let7-Bcl1-ORF2bs-PCRAFw/pCEP4\_Rv. The product was purified and  
770 cloned into pSA500 using BclI and BstZ17I sites.

771 Restriction enzymes were purchased from New England Biolabs (NEB).

## 772 **Generation of 3'UTR variants of pSA500**

773 Sequences were ordered as oligos flanked by a BstZ17I site (See Supplementary  
774 Table XI). First, 1 $\mu$ L of each Fw and Rv were annealed and phosphorylated  
775 with T4 Polynucleotide Kinase (PNK, NEB) using the following program: 30min  
776 at 37°C, 5min at 95°C, and then down to 25°C at -5°C/min. They were cloned in  
777 3'UTR of pSA500 using a BstZ17I site, generating pSA500-3'UTR-  
778 scrb/bs2rh/8mer. Constructs were checked by digestion and Sanger sequencing.

## 779 **Western Blot**

780 Cells were washed with 1X PBS, trypsinised and pelleted at 200g for 4 minutes.  
781 To extract proteins, cell pellets were resuspended in 50-100  $\mu$ L of RIPA buffer  
782 (Sigma) supplemented with 1X Complete EDTA-free Protease Inhibitor cocktail  
783 (Roche), PMSF (Sigma), 0.25%  $\beta$ -mercaptoethanol (Sigma) and incubated for 10  
784 min on ice. Extracts were then centrifuged (13000rpm at 4°C for 10 min) and  
785 debris-free supernatants were transferred to new tubes. Protein concentration  
786 was determined using the Micro BCA Protein Assay Kit (Thermo) following  
787 manufacturer's instructions.

788 To control the transfection efficiency in pSA500 western blots, three fractions of  
789 the cells were pelleted in different tubes after trypsinization, and DNA, RNA  
790 and protein extractions were performed simultaneously.



791 Proteins were resolved on an SDS-PAGE gel and transferred to a nitrocellulose  
792 membrane (BioRad). In L1-ORF2p western blots, proteins were resolved in a 4-  
793 15% Mini-PROTEAN TGX Precast Gels (BioRad), and transferred to a PVDF  
794 membrane using Trans-Blot Turbo Mini PVDF Transfer Packs (BioRad) and the  
795 Trans-Blot Turbo Transfer System (BioRad). For blotting we used the following  
796 antibodies: a polyclonal rabbit anti L1-ORF1p (1:1000, provided by Dr. Oliver  
797 Weichenrieder, Max-Planck, Germany), a monoclonal mouse anti L1-ORF1p  
798 (1:2000, Millipore), anti HMGA2 (1:1000, Abcam), anti DICER (1:1000, Cell  
799 Signalling), anti EBNA1 (1:500, Santa Cruz), anti tubulin (1:1000, Santa Cruz).  
800 For chemiluminescent detection we used anti rabbit HRP (1:1000, Cell  
801 Signaling) or anti mouse HRP (1:1000, Cell Signaling), and Clarity ECL Western  
802 Blotting Substrate (BioRad) or SuperSignal West Femto Maximum Sensitivity  
803 Substrate (Thermo). Images were acquired with an ImageQuant LAS4000 and  
804 quantified using ImageJ software. For Odyssey analysis, anti-rabbit and anti-  
805 mouse fluorescent antibodies (LI-COR) were used at 1:10000 dilution, and  
806 detection and quantification were performed in Odyssey (LI-COR).

#### 807 **qPCR and RT-qPCR**

808 To control plasmid transfection in L1-ORF2p western blots, we used a method  
809 previously described<sup>90</sup>. Briefly, transfected cells were lysed in a buffer  
810 containing 10mM Tris pH=8.2, 10mM EDTA, 200mM NaCl, 0.5%SDS and  
811 200µg/ml proteinase K, and incubating for 3h at 56°C with agitation.

812 Afterwards, DNA was purified with phenol:chloroform:isoamyl alcohol  
813 (25:24:1, Thermo) following standard procedures. 50ng of each DNA sample  
814 were used per qPCR reaction (GoTaq qPCR Mix, Promega), and an  
815 untransfected control was used to discard plasmid contamination. qPCR  
816 method is as follows: 5min at 95<sup>o</sup>, and 40 cycles of 15s at 95<sup>o</sup> followed by 60s at  
817 60<sup>o</sup>C. Plasmid levels were quantified using CMV and EBNA-1 primers, and  
818 normalization was performed using genomic GAPDH primers as described<sup>90</sup>.

819 RNA was extracted from cells using Trizol (Invitrogen), following  
820 manufacturer's instructions. 1µg of RNA was subsequently treated with RQ1  
821 DNase and purified by a phenol/chlorophorm extraction. cDNA was  
822 synthesized using High-Capacity cDNA Reverse Transcription Kit (Applied  
823 Biosystems), and used for qPCR (GoTaq qPCR Mix, Promega) using standard  
824 protocols. Two controls were used to verify the absence of contaminating  
825 gDNA: no-RT and no-template. Endogenous L1 mRNA was quantified using  
826 N51 primers as described<sup>91</sup>. Transfected L1 mRNA was quantified using  
827 NEOjunct2 primers designed to exclusively amplify the spliced NEO cDNA<sup>90</sup>  
828 (in Supplementary Fig. 5a,b) or SV40 primers when the NEO cassette was  
829 absent (Fig.5c and Supplementary Fig. 5h,k). GAPDH was used to normalize in  
830 Fig. 5c because an additional qPCR was used to quantify plasmid levels and  
831 discard differences in transfection efficiency. Elsewhere, EBNA mRNA,  
832 expressed from the backbone of the plasmids, was used to normalize.

833 For mature miRNAs quantification, a RT-qPCR was used. 1µg of total RNA  
834 isolated with Trizol was polyadenylated and then cDNA was synthesised,  
835 using qScript miRNA cDNA synthesis Kit (QuantaBio). Quantitative PCR was  
836 performed using a universal primer against poly(A) and a miRNA-specific  
837 primer that allows the specific detection of polyadenylated mature miRNA and  
838 not its precursors (QuantaBio). qPCR was performed with primers Let-7a, Let-  
839 7b and miR-34a.

#### 840 **Flow cytometry**

841 In 6-well plates, 2x10<sup>5</sup> HeLa cells were seeded per well. Next day, cells were  
842 transfected with 1µg of pVan583 and 40nM c-/let7inh using lipofectamine 2000  
843 (Life). Seventy-two hours post-transfection, cells were washed with 1XPBS  
844 (Life), detached with TrypLE Express (Gibco) for 5-10 min at 37°C, pelleted 4  
845 min at 200g, resuspended in 1X PBS with 5% FBS and 5mM EDTA, and passed  
846 through a 70µM filter. After incubation with 10ug/mL 7AAD (Sigma) for 10min,  
847 fluorescence was quantified in a FACSAria (BD) cytometer. For each replicate,  
848 10<sup>5</sup> cells were passed through the cytometer. Only live and transfected cells  
849 (7AAD- and GFP+, between 3600 and 9300 cells) were used for %mCherry  
850 analysis, which was performed using FlowJo software (LLC). Controls were  
851 used to set the threshold for each fluorescent channel of detection:  
852 untransfected cells, and cells expressing either GFP only or mCherry only.

#### 853 **Confocal microscopy**

854 2x10<sup>5</sup> U2OS per well were seeded in 6-well tissue culture plates. Next day, cells  
855 were transfected with 1µg of DNA and 60nM scr/mimic using lipofectamine  
856 2000 (Life), following standard protocols. Twenty-four hours post-transfection,  
857 cells were detached and re-seeded in 24-well plates where a UV-sterilized glass  
858 slide had previously been placed. Forty-eight hours post-transfection, cells were  
859 washed in 1xPBS, fixed in paraformaldehyde (4% in 1xPBS) for 30 minutes at  
860 room temperature, and slides were mounted with Slow-Fade Gold Antifade  
861 reagent with DAPI (Life). Slides were imaged using a Zeiss LSM-710 confocal  
862 microscope (Leica).

### 863 **Hybridization between let-7 and L1 prediction**

864 The potential structure formed by let-7 and WT L1 or its binding site mutant  
865 was analyzed by RNAHybrid as described<sup>73</sup>. Briefly, the region of L1Hs  
866 identified as 'bs2' with RNA22 was paired to the mature sequence of let-7,  
867 using default parameters.

### 868 **Plasmids**

869 pYX014, pYX015 and pYX017<sup>87</sup>, JM101/L1.3<sup>74</sup>, JM105/L1.3<sup>5</sup>, JJ101/L1.3<sup>92</sup> and  
870 TAM102/L1.3<sup>84</sup>, 99-UB-LRE3<sup>93</sup>, Tgf21-Neo<sup>94</sup>, Zfl2-1-Neo and Zfl2-2-Neo<sup>95</sup> have  
871 been previously described. JJ101/L1.3Δ3'UTR is a derivative of JJ101/L1.3 but  
872 the L1 lacks the 3'UTR<sup>48</sup>. JM101/L1.3bs2mut was generated by cloning a bs2mut  
873 L1 into JM101/L1.3 (cloning strategy described in the 'Site-directed  
874 mutagenesis' section of the methods). FLAG-Ago1 and FLAG-Ago2 were a gift

875 from Edward Chan (Addgene plasmid# 21533 and # 21538)<sup>96</sup>. pSA500 is as  
876 pAD500<sup>67</sup> where the TAP epitope was replaced by 3 consecutive copies of the  
877 FLAG epitope tag obtained from PJCC5 ORF1T7 ORF3XFLAG using BclI and  
878 BstZ17I restriction enzyme sites. pVan583 is a derivative of JM101/L1.3 where  
879 EGFP and mCherry were cloned in frame with the last amino acid of L1-ORF1  
880 and L1-ORF2, respectively. All psiCHECK2 constructs were generated by  
881 cloning sequences synthesized and cloned in pUC57 (Genescript) into  
882 psiCHECK2 using XhoI and NotI restriction enzyme sites (Promega).

883

## 884 REFERENCES

- 885 1. Lander, E.S. et al. Initial sequencing and analysis of the human genome. *Nature* **409**,  
886 860-921 (2001).
- 887 2. Richardson, S.R. et al. The Influence of LINE-1 and SINE Retrotransposons on  
888 Mammalian Genomes. *Microbiol Spectr* **3**, MDNA3-0061-2014 (2015).
- 889 3. Lander, E.S. et al. Initial sequencing and analysis of the human genome. *Nature* **409**,  
890 860-921 (2001).
- 891 4. Brouha, B. et al. Hot L1s account for the bulk of retrotransposition in the human  
892 population. *Proc Natl Acad Sci U S A* **100**, 5280-5 (2003).
- 893 5. Moran, J.V. et al. High frequency retrotransposition in cultured mammalian cells. *Cell*  
894 **87**, 917-27 (1996).
- 895 6. Ardeljan, D. et al. LINE-1 ORF2p expression is nearly imperceptible in human cancers.  
896 *Mob DNA* **11**, 1 (2020).
- 897 7. Taylor, M.S. et al. Affinity proteomics reveals human host factors implicated in discrete  
898 stages of LINE-1 retrotransposition. *Cell* **155**, 1034-48 (2013).
- 899 8. Alisch, R.S., Garcia-Perez, J.L., Muotri, A.R., Gage, F.H. & Moran, J.V. Unconventional  
900 translation of mammalian LINE-1 retrotransposons. *Genes Dev* **20**, 210-24 (2006).
- 901 9. Hohjoh, H. & Singer, M.F. Sequence-specific single-strand RNA binding protein  
902 encoded by the human LINE-1 retrotransposon. *Embo J* **16**, 6034-43 (1997).
- 903 10. Martin, S.L. & Bushman, F.D. Nucleic acid chaperone activity of the ORF1 protein from  
904 the mouse LINE-1 retrotransposon. *Mol Cell Biol* **21**, 467-75 (2001).
- 905 11. Mathias, S.L., Scott, A.F., Kazazian, H.H., Jr., Boeke, J.D. & Gabriel, A. Reverse  
906 transcriptase encoded by a human transposable element. *Science* **254**, 1808-10 (1991).
- 907 12. Feng, Q., Moran, J.V., Kazazian, H.H., Jr. & Boeke, J.D. Human L1 retrotransposon  
908 encodes a conserved endonuclease required for retrotransposition. *Cell* **87**, 905-16  
909 (1996).
- 910 13. Kulpa, D.A. & Moran, J.V. Cis-preferential LINE-1 reverse transcriptase activity in  
911 ribonucleoprotein particles. *Nat Struct Mol Biol* **13**, 655-60 (2006).
- 912 14. Luan, D.D., Korman, M.H., Jakubczak, J.L. & Eickbush, T.H. Reverse transcription of  
913 R2Bm RNA is primed by a nick at the chromosomal target site: a mechanism for non-  
914 LTR retrotransposition. *Cell* **72**, 595-605 (1993).
- 915 15. Cost, G.J., Feng, Q., Jacquier, A. & Boeke, J.D. Human L1 element target-primed reverse  
916 transcription in vitro. *Embo J* **21**, 5899-910 (2002).
- 917 16. Flasch, D.A. et al. Genome-wide de novo L1 Retrotransposition Connects Endonuclease  
918 Activity with Replication. *Cell* **177**, 837-851 e28 (2019).
- 919 17. Sultana, T. et al. The Landscape of L1 Retrotransposons in the Human Genome Is  
920 Shaped by Pre-insertion Sequence Biases and Post-insertion Selection. *Mol Cell* **74**,  
921 555-570 e7 (2019).
- 922 18. Monot, C. et al. The specificity and flexibility of L1 reverse transcription priming at  
923 imperfect T-tracts. *PLoS Genet* **9**, e1003499 (2013).
- 924 19. Dewannieux, M., Esnault, C. & Heidmann, T. LINE-mediated retrotransposition of  
925 marked Alu sequences. *Nat Genet* **35**, 41-8 (2003).
- 926 20. Hancks, D.C., Goodier, J.L., Mandal, P.K., Cheung, L.E. & Kazazian, H.H., Jr.  
927 Retrotransposition of marked SVA elements by human L1s in cultured cells. *Hum Mol*  
928 *Genet* **20**, 3386-400 (2011).
- 929 21. Esnault, C., Maestre, J. & Heidmann, T. Human LINE retrotransposons generate  
930 processed pseudogenes. *Nat Genet* **24**, 363-7 (2000).
- 931 22. Konkel, M.K. & Batzer, M.A. A mobile threat to genome stability: The impact of non-  
932 LTR retrotransposons upon the human genome. *Semin Cancer Biol* **20**, 211-21 (2010).

- 933 23. Hancks, D.C. & Kazazian, H.H., Jr. Roles for retrotransposon insertions in human  
934 disease. *Mob DNA* **7**, 9 (2016).
- 935 24. Kazazian, H.H., Jr. & Moran, J.V. Mobile DNA in Health and Disease. *N Engl J Med* **377**,  
936 361-370 (2017).
- 937 25. Ewing, A.D. et al. Widespread somatic L1 retrotransposition occurs early during  
938 gastrointestinal cancer evolution. *Genome Res* **25**, 1536-45 (2015).
- 939 26. Helman, E. et al. Somatic retrotransposition in human cancer revealed by whole-  
940 genome and exome sequencing. *Genome Res* **24**, 1053-63 (2014).
- 941 27. Lee, E. et al. Landscape of somatic retrotransposition in human cancers. *Science* **337**,  
942 967-71 (2012).
- 943 28. Miki, Y. et al. Disruption of the APC gene by a retrotransposal insertion of L1 sequence  
944 in a colon cancer. *Cancer Res* **52**, 643-5 (1992).
- 945 29. Rodic, N. et al. Retrotransposon insertions in the clonal evolution of pancreatic ductal  
946 adenocarcinoma. *Nat Med* **21**, 1060-4 (2015).
- 947 30. Scott, E.C. et al. A hot L1 retrotransposon evades somatic repression and initiates  
948 human colorectal cancer. *Genome Res* **26**, 745-55 (2016).
- 949 31. Shukla, R. et al. Endogenous retrotransposition activates oncogenic pathways in  
950 hepatocellular carcinoma. *Cell* **153**, 101-11 (2013).
- 951 32. Tubio, J.M.C. et al. Mobile DNA in cancer. Extensive transduction of nonrepetitive DNA  
952 mediated by L1 retrotransposition in cancer genomes. *Science* **345**, 1251343 (2014).
- 953 33. Nguyen, T.H.M. et al. L1 Retrotransposon Heterogeneity in Ovarian Tumor Cell  
954 Evolution. *Cell Rep* **23**, 3730-3740 (2018).
- 955 34. Schauer, S.N. et al. L1 retrotransposition is a common feature of mammalian  
956 hepatocarcinogenesis. *Genome Res* **28**, 639-653 (2018).
- 957 35. Doucet-O'Hare, T.T. et al. LINE-1 expression and retrotransposition in Barrett's  
958 esophagus and esophageal carcinoma. *Proc Natl Acad Sci U S A* **112**, E4894-900 (2015).
- 959 36. Iskow, R.C. et al. Natural mutagenesis of human genomes by endogenous  
960 retrotransposons. *Cell* **141**, 1253-61 (2010).
- 961 37. Scott, E.C. & Devine, S.E. The Role of Somatic L1 Retrotransposition in Human Cancers.  
962 *Viruses* **9**(2017).
- 963 38. Burns, K.H. Transposable elements in cancer. *Nature Reviews Cancer* **17**, 415-424  
964 (2017).
- 965 39. Rodriguez-Martin, B. et al. Pan-cancer analysis of whole genomes identifies driver  
966 rearrangements promoted by LINE-1 retrotransposition. *Nat Genet* (2020).
- 967 40. Bourc'his, D. & Bestor, T.H. Meiotic catastrophe and retrotransposon reactivation in  
968 male germ cells lacking Dnmt3L. *Nature* **431**, 96-9 (2004).
- 969 41. Sanchez-Luque, F.J. et al. LINE-1 Evasion of Epigenetic Repression in Humans. *Mol Cell*  
970 (2019).
- 971 42. Bartel, D.P. Metazoan MicroRNAs. *Cell* **173**, 20-51 (2018).
- 972 43. Fabian, M.R., Sonenberg, N. & Filipowicz, W. Regulation of mRNA translation and  
973 stability by microRNAs. *Annu Rev Biochem* **79**, 351-79 (2010).
- 974 44. Friedman, R.C., Farh, K.K., Burge, C.B. & Bartel, D.P. Most mammalian mRNAs are  
975 conserved targets of microRNAs. *Genome Res* **19**, 92-105 (2009).
- 976 45. Lu, J. et al. MicroRNA expression profiles classify human cancers. *Nature* **435**, 834-8  
977 (2005).
- 978 46. Lujambio, A. & Lowe, S.W. The microcosmos of cancer. *Nature* **482**, 347-55 (2012).
- 979 47. Heras, S.R., Macias, S., Caceres, J.F. & Garcia-Perez, J.L. Control of mammalian  
980 retrotransposons by cellular RNA processing activities. *Mob Genet Elements* **4**, e28439  
981 (2014).
- 982 48. Heras, S.R. et al. The Microprocessor controls the activity of mammalian  
983 retrotransposons. *Nat Struct Mol Biol* **20**, 1173-81 (2013).

- 984 49. Bodak, M., Cirera-Salinas, D., Yu, J., Ngondo, R.P. & Ciaudo, C. Dicer, a new regulator of  
985 pluripotency exit and LINE-1 elements in mouse embryonic stem cells. *FEBS Open Bio*  
986 **7**, 204-220 (2017).
- 987 50. Hamdorf, M. et al. miR-128 represses L1 retrotransposition by binding directly to L1  
988 RNA. *Nat Struct Mol Biol* **22**, 824-31 (2015).
- 989 51. Gardner, E.J. et al. The Mobile Element Locator Tool (MELT): population-scale mobile  
990 element discovery and biology. *Genome Res* **27**, 1916-1929 (2017).
- 991 52. Mir, A.A., Philippe, C. & Cristofari, G. euL1db: the European database of L1HS  
992 retrotransposon insertions in humans. *Nucleic Acids Res* **43**, D43-7 (2015).
- 993 53. Inamura, K. & Ishikawa, Y. MicroRNA In Lung Cancer: Novel Biomarkers and Potential  
994 Tools for Treatment. *J Clin Med* **5**(2016).
- 995 54. Roush, S. & Slack, F.J. The let-7 family of microRNAs. *Trends Cell Biol* **18**, 505-16 (2008).
- 996 55. Takamizawa, J. et al. Reduced expression of the let-7 microRNAs in human lung  
997 cancers in association with shortened postoperative survival. *Cancer Res* **64**, 3753-6  
998 (2004).
- 999 56. Yanaihara, N. et al. Unique microRNA molecular profiles in lung cancer diagnosis and  
1000 prognosis. *Cancer Cell* **9**, 189-98 (2006).
- 1001 57. He, L. et al. A microRNA component of the p53 tumour suppressor network. *Nature*  
1002 **447**, 1130-4 (2007).
- 1003 58. Yang, W.R., Ardeljan, D., Pacyna, C.N., Payer, L.M. & Burns, K.H. SQUIRE reveals locus-  
1004 specific regulation of interspersed repeat expression. *Nucleic Acids Res* **47**, e27 (2019).
- 1005 59. Tristan-Ramos, P. et al. sRNA/L1 retrotransposition: using siRNAs and miRNAs to  
1006 expand the applications of the cell culture-based LINE-1 retrotransposition assay.  
1007 *Philos Trans R Soc Lond B Biol Sci* **375**, 20190346 (2020).
- 1008 60. Robertson, B. et al. Specificity and functionality of microRNA inhibitors. *Silence* **1**, 10  
1009 (2010).
- 1010 61. Taylor, M.S. et al. Dissection of affinity captured LINE-1 macromolecular complexes.  
1011 *Elife* **7**(2018).
- 1012 62. Liu, N. et al. Selective silencing of euchromatic L1s revealed by genome-wide screens  
1013 for L1 regulators. *Nature* **553**, 228-232 (2018).
- 1014 63. Forman, J.J., Legesse-Miller, A. & Collier, H.A. A search for conserved sequences in  
1015 coding regions reveals that the let-7 microRNA targets Dicer within its coding  
1016 sequence. *Proc Natl Acad Sci U S A* **105**, 14879-84 (2008).
- 1017 64. Hausser, J., Syed, A.P., Bilen, B. & Zavolan, M. Analysis of CDS-located miRNA target  
1018 sites suggests that they can effectively inhibit translation. *Genome Res* **23**, 604-15  
1019 (2013).
- 1020 65. Helwak, A., Kudla, G., Dudnakova, T. & Tollervey, D. Mapping the human miRNA  
1021 interactome by CLASH reveals frequent noncanonical binding. *Cell* **153**, 654-65 (2013).
- 1022 66. Meister, G. et al. Human Argonaute2 mediates RNA cleavage targeted by miRNAs and  
1023 siRNAs. *Mol Cell* **15**, 185-97 (2004).
- 1024 67. Doucet, A.J. et al. Characterization of LINE-1 ribonucleoprotein particles. *PLoS Genet*  
1025 **6**(2010).
- 1026 68. Goodier, J.L., Zhang, L., Vetter, M.R. & Kazazian, H.H., Jr. LINE-1 ORF1 protein localizes  
1027 in stress granules with other RNA-binding proteins, including components of RNA  
1028 interference RNA-induced silencing complex. *Mol Cell Biol* **27**, 6469-83 (2007).
- 1029 69. Garcia-Perez, J.L. et al. Epigenetic silencing of engineered L1 retrotransposition events  
1030 in human embryonic carcinoma cells. *Nature* **466**, 769-73 (2010).
- 1031 70. Lee, Y.S. & Dutta, A. The tumor suppressor microRNA let-7 represses the HMGA2  
1032 oncogene. *Genes Dev* **21**, 1025-30 (2007).
- 1033 71. John, B. et al. Human MicroRNA targets. *PLoS Biol* **2**, e363 (2004).
- 1034 72. Miranda, K.C. et al. A pattern-based method for the identification of MicroRNA binding  
1035 sites and their corresponding heteroduplexes. *Cell* **126**, 1203-17 (2006).



- 1036 73. Rehmsmeier, M., Steffen, P., Hochsmann, M. & Giegerich, R. Fast and effective  
1037 prediction of microRNA/target duplexes. *RNA* **10**, 1507-17 (2004).  
1038 74. Sassaman, D.M. et al. Many human L1 elements are capable of retrotransposition. *Nat*  
1039 *Genet* **16**, 37-43 (1997).  
1040 75. Kim, D. et al. General rules for functional microRNA targeting. *Nat Genet* **48**, 1517-  
1041 1526 (2016).  
1042 76. Jonas, S. & Izaurralde, E. Towards a molecular understanding of microRNA-mediated  
1043 gene silencing. *Nat Rev Genet* **16**, 421-33 (2015).  
1044 77. Pizarro, J.G. & Cristofari, G. Post-Transcriptional Control of LINE-1 Retrotransposition  
1045 by Cellular Host Factors in Somatic Cells. *Front Cell Dev Biol* **4**, 14 (2016).  
1046 78. Nair, V.S., Maeda, L.S. & Ioannidis, J.P. Clinical outcome prediction by microRNAs in  
1047 human cancer: a systematic review. *J Natl Cancer Inst* **104**, 528-40 (2012).  
1048 79. Meister, G. Argonaute proteins: functional insights and emerging roles. *Nat Rev Genet*  
1049 **14**, 447-59 (2013).  
1050 80. Reczko, M., Maragkakis, M., Alexiou, P., Grosse, I. & Hatzigeorgiou, A.G. Functional  
1051 microRNA targets in protein coding sequences. *Bioinformatics* **28**, 771-6 (2012).  
1052 81. Zhang, K. et al. A novel class of microRNA-recognition elements that function only  
1053 within open reading frames. *Nat Struct Mol Biol* **25**, 1019-1027 (2018).  
1054 82. Grossman, R.L. et al. Toward a Shared Vision for Cancer Genomic Data. *N Engl J Med*  
1055 **375**, 1109-12 (2016).  
1056 83. MacLennan, M. et al. Mobilization of LINE-1 retrotransposons is restricted by Tex19.1  
1057 in mouse embryonic stem cells. *Elife* **6**(2017).  
1058 84. Morrish, T.A. et al. DNA repair mediated by endonuclease-independent LINE-1  
1059 retrotransposition. *Nat Genet* **31**, 159-65 (2002).  
1060 85. Ostertag, E.M., Prak, E.T., DeBerardinis, R.J., Moran, J.V. & Kazazian, H.H., Jr.  
1061 Determination of L1 retrotransposition kinetics in cultured cells. *Nucleic Acids Res* **28**,  
1062 1418-23 (2000).  
1063 86. Wei, W., Morrish, T.A., Alisch, R.S. & Moran, J.V. A transient assay reveals that cultured  
1064 human cells can accommodate multiple LINE-1 retrotransposition events. *Anal*  
1065 *Biochem* **284**, 435-8 (2000).  
1066 87. Xie, Y., Rosser, J.M., Thompson, T.L., Boeke, J.D. & An, W. Characterization of L1  
1067 retrotransposition with high-throughput dual-luciferase assays. *Nucleic Acids Res* **39**,  
1068 e16 (2011).  
1069 88. Richardson, S.R., Narvaiza, I., Planegger, R.A., Weitzman, M.D. & Moran, J.V.  
1070 APOBEC3A deaminates transiently exposed single-strand DNA during LINE-1  
1071 retrotransposition. *Elife* **3**, e02008 (2014).  
1072 89. Heckman, K.L. & Pease, L.R. Gene splicing and mutagenesis by PCR-driven overlap  
1073 extension. *Nat Protoc* **2**, 924-32 (2007).  
1074 90. Banuelos-Sanchez, G. et al. Synthesis and Characterization of Specific Reverse  
1075 Transcriptase Inhibitors for Mammalian LINE-1 Retrotransposons. *Cell Chem Biol*  
1076 (2019).  
1077 91. Macia, A. et al. Engineered LINE-1 retrotransposition in nondividing human neurons.  
1078 *Genome Res* **27**, 335-348 (2017).  
1079 92. Kopera, H.C., Moldovan, J.B., Morrish, T.A., Garcia-Perez, J.L. & Moran, J.V. Similarities  
1080 between long interspersed element-1 (LINE-1) reverse transcriptase and telomerase.  
1081 *Proc Natl Acad Sci U S A* **108**, 20345-50 (2011).  
1082 93. Coufal, N.G. et al. L1 retrotransposition in human neural progenitor cells. *Nature* **460**,  
1083 1127-31 (2009).  
1084 94. Goodier, J.L., Ostertag, E.M., Du, K. & Kazazian, H.H., Jr. A novel active L1  
1085 retrotransposon subfamily in the mouse. *Genome Res* **11**, 1677-85 (2001).  
1086 95. Sugano, T., Kajikawa, M. & Okada, N. Isolation and characterization of  
1087 retrotransposition-competent LINES from zebrafish. *Gene* **365**, 74-82 (2006).

1088 96. Lian, S.L. et al. The C-terminal half of human Ago2 binds to multiple GW-rich regions of  
1089 GW182 and requires GW182 to mediate silencing. *RNA* **15**, 804-13 (2009).

1090

1091

1092

1093 **FIGURE LEGENDS**

1094 **Figure 1. Downregulation of let-7 and miR-34a miRNAs correlates with L1**

1095 **retrotransposition accumulation in lung tumor samples. (a)** Schematic

1096 representation of the bioinformatic analysis used to identify differentially

1097 expressed miRNAs in lung cancer samples with or without tumor specific L1

1098 insertions. **(b)** A graph plot representing the expression levels of miRNAs

1099 previously associated with lung cancer<sup>53</sup> in lung tumor samples without (dark

1100 grey, N=14) and with (light grey, N=27) tumor specific L1 insertions identified

1101 by MELT. Differentially expressed miRNAs are marked with \* and were

1102 identified applying an unpaired two-tailed t test adjusted by FDR<0.01. To

1103 enable representation of all miRNAs in one graph, expression in reads per

1104 million (rpm) was relative to the maximum value of each miRNA in each case.

1105 Whiskers were calculated using the Tukey method. Individual black dots

1106 represent outliers. Boxes extend from 25<sup>th</sup> to 75<sup>th</sup> percentiles, and lines in the

1107 middle of the boxes represent the median.

1108 **Figure 2. Let-7 regulates engineered human LINE-1 retrotransposition. (a)** Left

1109 panel: rationale of the retrotransposition assay in cultured cells. From left to

1110 right: transcription start site in the 5'UTR (black arrow), the two L1 open

1111 reading frames ORF1 (brown rectangle) and ORF2 (blue rectangle), the

1112 antisense-oriented reporter cassette (white rectangles, backward REP)

1113 interrupted by an intron, and the reporter gene promoter (inverted black

1114 arrow). Black lollipops represent poly(A) signals. TSD: Target Site Duplications.  
1115 SD: Splicing Donor. SA: Splicing Acceptor. Right panel: reporter cassettes used  
1116 in this study: neomycin (NEO or *mneoI*) and blasticidin (BLAST or *mblastI*)  
1117 resistance, enhanced green fluorescent protein (EGFP or *megfpI*), and firefly  
1118 luciferase (FLUC or *mflucI*). **(b and c)** Structures of pJM101/L1.3 and pU6iNeo  
1119 constructs are shown. **(b)** HeLa cells were cotransfected with one of the  
1120 plasmids and let-7a/miR-34a mimic and their control (scr). **(c)** HeLa cells were  
1121 cotransfected with one of the plasmids and let-7 inhibitor and their control (c-).  
1122 In **(b-c)**, a representative well of three replicates is shown. Quantification of  
1123 each experiment is shown at the right as average of three replicates  $\pm$  s.d. **(d)**  
1124 Structures of pYX017 and pYX015 are shown. CAG: Chicken Actin Globin  
1125 promoter. The “\*” symbol in pYX015 indicates the two point-mutations in L1-  
1126 ORF1p that abolish retrotransposition. Lung cancer cell lines A549 and SK-  
1127 MES-1 were co-transfected with pYX017 or pYX015 and let-7 inhibitor or its  
1128 control (c-). Luciferase activity was measured 96h post-transfection, and Firefly  
1129 luciferase signal was normalized to Renilla luciferase to correct for differences  
1130 in transfection efficiency or cell survival. In both cases, averages of three  
1131 replicates  $\pm$  s.d. are shown. \* in graphs, denotes statistical significance (p value  
1132  $< 0.05$ ). RLU: Relative Luminescence Units.

1133 **Figure 3. Let-7 binds directly to the coding sequence of L1 mRNA. (a)** Cell  
1134 culture based retrotransposition assay using *mneoI* reporter cassette. HeLa cells

1135 were co-transfected with LINEs from different species and let-7 inhibitor or its  
1136 control (c-). All constructs have an exogenous CMV promoter to normalized  
1137 transcription. Black arrows represent transcription start sites. Grey triangles in  
1138 mouse and zebrafish LINEs illustrate the presence of monomers in the 5'UTR of  
1139 these elements. Stem loop (grey) pictures the hairpin structures present in the 3'  
1140 UTR of the zebrafish LINE-2s, required for retrotransposition. White stripes are  
1141 included to remark the differences in sequence of zebrafish L2-2 and L2-1 with  
1142 respect to the human L1.3 and mouse L1G<sub>F</sub>. A representative well of three  
1143 biological replicates is shown in the middle panel. Quantification is shown on  
1144 the right as average  $\pm$  s.d. **(b)** Cell culture-based retrotransposition assay with  
1145 blasticidin resistance cassette. HeLa cells were co-transfected with LINEs  
1146 lacking either the 5' or the 3' UTR (structures shown in the left) and let-7  
1147 inhibitor or its control (c-). A representative well of three replicates is shown.  
1148 Quantification is shown at the right as average of three replicates  $\pm$  s.d. In **(a-b)**,  
1149 '\*\*' indicates  $p < 0.05$ . **(c)** Scheme of RNA Immunoprecipitation (RIP) of AGO2-  
1150 FLAG and RT-qPCR analysis of endogenous mRNA enrichment upon let-7  
1151 overexpression. Embryonic teratocarcinoma cells (PA-1) were co-transfected  
1152 with a plasmid to overexpress AGO2-FLAG and let-7 mimic. AGO2-FLAG  
1153 (orange circle with green flag) was immunoprecipitated with a FLAG antibody  
1154 (black circle and lines), and the RNA bound to AGO2 (L1 mRNA is shown in  
1155 blue) was purified and analyzed by RT-qPCR. Transfection with pBSKS (empty  
1156 vector) was used as a negative control. **(d)** Real-time RT-qPCR analysis of

1157 endogenous L1 mRNA upon immunoprecipitation of AGO-2-FLAG of one  
1158 representative experiment of three replicates. Left panel: loading controls are  
1159 shown for input and IP. Right panel: mRNA relative enrichment upon let-7  
1160 overexpression: LINE-1 (blue), HMGA2 (yellow), GAPDH (red), and ACTIN  
1161 (grey) are shown.

1162

1163 **Figure 4. L1 mRNA contains a functional let-7 binding site located in L1-**  
1164 **ORF2. (a)** RNAhybrid prediction of the best binding site for let-7 located in the  
1165 L1 sequence. Base-pairing between this region and let-7b is shown (green  
1166 rectangle). Localization of the putative binding site ('bs2rh') within L1 sequence  
1167 is shown (green line). Structure of LINE-1 is shown: transcription start site  
1168 (black arrow), 5' untranslated region (UTR), ORF1, ORF2 with its three domains  
1169 endonuclease (EN), reverse transcriptase (RT), and cysteine-rich (C), and 3'  
1170 UTR. Folding energy of the predicted binding site is shown below. **(b)**  
1171 psiCHECK2 assay with 'bsrh' and 'bs2rhmut'. Left panel: scheme of  
1172 psiCHECK2 plasmid containing SV40 promoter, Renilla luciferase gene (RLuc,  
1173 orange rectangle), different sequences cloned in the 3'UTR of the RLuc gene  
1174 (grey rectangle), and Firefly luciferase gene (FLuc, brown rectangle).  
1175 Comparison of the sequences cloned in psiCHECK2 as 'bs2rh' and 'bs2rhmut' is  
1176 shown below, with the nucleotides interacting with let-7 in capital letters and  
1177 the different nucleotides highlighted in red. Right panel: HEK293T cells were

1178 co-transfected with the different psiCHECK2 constructs and scr or let-7 mimic.  
1179 Error bars represent s.d. of three replicates. RLU: Relative Luminescence Units.  
1180 **(c)** Scheme of the wild type L1.3 and the binding site mutant 'bs2rhmut L1.3'  
1181 generated by site-directed mutagenesis. Red thunder indicates location of the  
1182 mutated binding site. **(d)** HeLa cells were co-transfected with JM101/L1.3 or  
1183 JM101/bs2rhmut L1.3 and let-7 inhibitor or its control (c-). A representative well  
1184 of three replicates is shown. Quantification is shown as retrotransposition rate  
1185 (relative to c-) and raw colony count, in both cases as average of three replicates  
1186  $\pm$  s.d. \* denotes  $p < 0.05$  after applying a t-test.

1187

1188

1189 **Figure 5. Let-7 impairs L1-ORF2p translation.** **(a)** RT-qPCR analysis of  
1190 endogenous LINE-1 (blue bar), HMGA2 (purple bar), DICER (green bar), and  
1191 ACTIN (orange bar) mRNAs upon let-7 overexpression in HEK293T. Cells were  
1192 transfected with let-7 mimic or its control (scr), and RNA was extracted at 24h  
1193 or 48h post-transfection. GAPDH was used to normalize. Error bars indicate  
1194 s.d. of three replicates. **(b)** Western blot analyses of endogenous L1-ORF1p and  
1195 HMGA2 protein levels in HEK293T cells upon let-7 overexpression. Cells were  
1196 transfected with let-7 mimic. Representative well and quantification of the  
1197 western blot are shown. Error bars indicate s.d. of four biological replicates. **(c)**  
1198 Western blot analyses of L1-ORF2p-FLAG upon let-7 overexpression or

1199 depletion in HeLa cells. A scheme of construct pSA500 is shown. HeLa cells  
1200 were co-transfected with pSA500 and let-7 mimic or inhibitor and their controls  
1201 (scr or c- respectively). L1-ORF2p was detected using a FLAG antibody. DICER,  
1202 a known let-7 target, was used as a positive control. Representative well and  
1203 quantification of the western blot are shown. Error bars represent s.d of three  
1204 replicates. Below, RT-qPCR analyses of the levels of DICER and L1-ORF2-  
1205 3xFLAG mRNA upon overexpression or depletion of let-7. GAPDH was used to  
1206 normalize. Error bars represent s.d of three replicates. **(d)** Flow cytometry  
1207 quantification of L1-ORF2p-mCherry levels upon let-7 depletion in HeLa cells.  
1208 The structure of construct pVan583 is shown. pVan583 is a derivative of  
1209 JM101/L1.3 with L1-ORF1p fused to EGFP and L1-ORF2p fused to mCherry  
1210 both at the C-terminus. HeLa cells were co-transfected with pVan583 and let-7  
1211 inhibitor or its control (c-), and fluorescence was measured by flow cytometry.  
1212 Graph shows the percentage of mCherry+ cells in the EGFP+ (transfected)  
1213 population. Error bars indicate s.d. of three replicates. A representative FACS  
1214 histogram of three replicates in each condition is shown (the percentage of  
1215 ORF1p-GFP positive cells expressing ORF2p-Cherry protein).

1216

1217

1218 **Figure 6. Model for the control of LINE-1 retrotransposition by the tumor**

1219 **suppressor microRNA let-7.** Besides the well-known regulation of oncogenes



1220 (lower part of the scheme in grey), we propose a novel tumor-suppressor role  
1221 for let-7 microRNAs (upper part of the scheme in colour). Once LINE-1 RNA is  
1222 transcribed from an active L1 located in the genome and is exported into the  
1223 cytoplasm, let-7 (drawn in red) binds and guides the RISC complex (grey circle)  
1224 to the L1 mRNA (blue line). This binding leads to the inhibition of ORF2p  
1225 translation (blue circle) and consequently, impairs the formation of the  
1226 ribonucleoparticle (ORF1p (brown circle) and ORF2p (blue circle)). The  
1227 reduction in ORF2p levels results in a decrease in the reverse transcriptase  
1228 activity in the nucleus and the number of new L1 copies integrated in the  
1229 genome, consequently, reduces the L1-associated genomic instability.

1230 **Supplementary Figure 1. Controls to corroborate the correlation between let-7**  
1231 **and miR-34a expression levels and accumulation of tumor-specific L1**  
1232 **insertion in lung tumor samples. (a)** Analysis in Figure 1 was repeated after  
1233 randomly re-assigning the value of tumor-specific L1 insertions to the samples,  
1234 showing no significant correlation with miRNA levels. **(b)** RNA-seq analysis  
1235 showed that L1Hs is overexpressed in lung tumor samples with tumor-specific  
1236 L1 insertions (left panel). Pair-wise correlations between expression levels of  
1237 L1Hs and let-7a, let-7e, let-7f-2 and miR-34a (Pearson'  $r$ ).  $P$ -value was  
1238 considered significant if  $<0.05$ . **(c)** Correlation between miRNA expression and  
1239 tumor-specific L1 insertions identified by Helman and col. using Transpo-seq  
1240 was analyzed as in Figures 1 and Supplementary 1a. Reduced expression of

1241 members of the let-7 family and miR-34a correlated with increased number of  
1242 tumor-specific L1 insertions. **(d)** Analysis of Supplementary Fig 1c was repeated  
1243 after randomly re-assigning the value of tumor-specific L1 insertions to the  
1244 samples. **(e)** Analysis in **(c)** was repeated using breast samples, in which tumor-  
1245 specific L1 insertions had been identified by Helman and col. using Transpo-  
1246 seq. **(a, c, d, e)** A schematic representation of the bioinformatic analysis used is  
1247 represented on a left panel. Differentially expressed miRNAs were identified  
1248 applying an unpaired two-tailed t test adjusted by  $FDR < 0.01$ . To enable  
1249 representation of all miRNAs in one graph, expression (rpm) was relative to the  
1250 maximum value of each miRNA in each case. Whiskers were calculated using  
1251 the Tukey method. Individual black dots represent outliers. Boxes extend from  
1252 25<sup>th</sup> to 75<sup>th</sup> percentiles, and lines in the middle of the boxes represent the  
1253 median.

1254 **Supplementary Figure 2. Engineered human L1 retrotransposition increases**  
1255 **and decreases upon let-7 depletion or overexpression, respectively, in a**  
1256 **variety of cell lines. (a)** RT-qPCR quantification of mature let-7a and mir-34a in  
1257 HeLa and HEK293T cells. Averages of three replicates are shown. Error bars  
1258 indicate s.d. **(b)** The structure of pJJ101/L1.3 is shown. HeLa cells were  
1259 cotransfected with L1 plasmid and let-7b mimic or its control (scr). A  
1260 representative well of three replicates is shown. Quantification is shown at the  
1261 right as average of three replicates  $\pm$  s.d. \* indicates  $p < 0.05$  after applying two-

1262 tailed t test. **(c-f)** Cell culture based retrotransposition assays with luciferase (c,  
1263 d, f) or enhanced GFP (e) cassettes. In all cases, error bars indicate s.d., and \*  
1264 indicates  $p < 0.05$ . In **(c)**, **(d)** and **(f)**, RLU: Relative Luminescence Units. **(c)**  
1265 Structure of pYX014 and pYX015 are shown. HEK293T cells were cotransfected  
1266 with one of them and let-7 mimic or its control (scr). Averages of three  
1267 replicates are shown. Error bars indicate s.d. (d) HEK293T cells were  
1268 cotransfected with pYX014 or pYX015 and miR-34 mimic or its control (scr).  
1269 Averages of three replicates are shown. Error bars indicate s.d. **(e)** The structure  
1270 of 99-UB-LRE3 is shown. HEK293T cells were cotransfected with L1 plasmid  
1271 and let-7 inhibitor or its control (c-). Average of three replicates is shown. **(f)**  
1272 Structure of pYX017 and pYX014 are shown. See **(c)** for pYX015 structure.  
1273 HEK293T cells were cotransfected with L1 plasmid and let-7 inhibitor or its  
1274 control (c-). Average of three replicates is shown. Luciferase signal is shown  
1275 relative to pYX014 c-. **(g)** RT-qPCR analysis of the mature let-7a and let-7b  
1276 miRNA expression levels in all cell lines used in this study. Averages of three  
1277 replicates are shown. Error bars indicate s.d.

1278 **Supplementary Figure 3. Let-7 guides AGO to the coding sequence of human**  
1279 **L1 mRNA. (a)** Cell culture-based retrotransposition assay with *mneoI* tagged  
1280 constructs. HeLa cells were co-transfected with LINEs from different species  
1281 and let-7 mimic. For details of the constructs used see **Fig. 3a**. A representative  
1282 well of three independent biological replicates is shown. Quantification is

1283 shown in the right as average of two replicates  $\pm$  s.d. **(b)** Cell culture-based  
1284 retrotransposition assay using *mblast1* tagged constructs. HeLa cells were co-  
1285 transfected with LINEs lacking either the 5' or the 3' UTR (detailed structures  
1286 shown in **Fig. 3b**) and let-7 mimic or its control (scr). A representative well of  
1287 four replicates is shown. Quantification is shown in the right as average of four  
1288 replicates  $\pm$  s.d. **(c)** Co-immunoprecipitation (co-IP) of FLAG-AGO1/2 and  
1289 endogenous ORF1p in the presence/absence of RNase. PA-1 cells were co-  
1290 transfected with a plasmid to overexpress AGO1 or AGO2 tagged with FLAG  
1291 epitope. 'mock' condition refers to cells transfected with an empty plasmid.  
1292 AGO1/2 was immunoprecipitated using a FLAG antibody in the presence or  
1293 absence of RNase A. Loading controls (input) and western blot (IP) are shown.  
1294 Scheme in the right illustrates the model this experiment suggests: interaction  
1295 between AGO1/2 and ORF1p is RNA-dependent, therefore both proteins  
1296 interact directly with L1 mRNA and are probably guided by miRNAs.

1297 **Supplementary Figure 4. Identification of a let-7 binding site in human L1-**  
1298 **ORF2. (a)** The best predicted binding site of two different algorithms were  
1299 tested with psiCHECK2. Location, method used for its prediction and  $\Delta$ G of its  
1300 predictive binding to L1.3 are summarized in the table. Predicted pairing of  
1301 these sequences with let-7a and let-7b is shown on the left. Graphs below show  
1302 the results of the psiCHECK2 assays with each of them (see Fig. 4b for a  
1303 detailed structure of this vector). HEK293T cells were co-transfected with three

1304 different psiCHECK2 constructs and let-7 mimic or its control (scr). 'no bs' is a  
1305 negative control (a sequence without complementarity to let-7) and 'perfect bs'  
1306 is a positive control (with perfect complementarity to let-7). RLU: Relative  
1307 Luciferase Units. Error bars indicate s.d. of three replicates. **(b)** RNAhybrid  
1308 prediction of 'bs2rhmut' and let-7 interaction. Base-pairing between this region  
1309 and let-7b is shown (green rectangle). Folding energy is shown on the right. **(c)**  
1310 Alignment of the consensus sequence of L1PA1 to L1PA16 families showing  
1311 conservation of the let-7 binding site 'bs2rh' (in blue). **(d)** Alignment of the  
1312 predicted binding site region in all L1s used in this study: human  
1313 L1.3/L1RP/LRE3, mouse L1G<sub>F</sub>, and zebrafish L2.1 and L2.2. Alignment below  
1314 was performed with ORF2 protein sequences to localize the binding site region  
1315 within each LINE (asterisks denote conserved aminoacids). Human and mouse  
1316 L1s nucleotide sequences were further analyzed. Blue nucleotides represent the  
1317 'bs2rh' region that was predicted by RNAhybrid and validated as a binding site  
1318 in psiCHECK2. Red nucleotides are those which differ in mouse L1G<sub>F</sub> respect to  
1319 human L1.3, LRE3 or L1RP.

1320 **Supplementary Figure 5: Let-7 affects exogenous L1-ORF2p translation but**  
1321 **not L1-ORF1p or L1 mRNA levels. (a-b)** RT-qPCR analysis of L1 mRNA levels  
1322 transcribed from a plasmid. HEK293T were transfected with JM101/L1.3 and **(a)**  
1323 let-7 mimic or **(b)** let-7 inhibitor. Exogenous L1 mRNA was specifically detected  
1324 using primers against the spliced neomycin-resistance cassette. HMGA2 was

1325 used as a positive control. EBNA-1, expressed constitutively from the plasmid  
1326 backbone, was used to normalize. Error bars indicate s.d. \* $p < 0.05$ . **(c)** Western  
1327 blot analyses of endogenous L1-ORF1p and HMGA2 protein levels upon let-7  
1328 depletion. HEK293T cells were transfected with let-7 inhibitor or its control (c-).  
1329 Error bars indicate s.d. of two biological replicates. \* $p < 0.05$ . **(d)** Western blot  
1330 analyses of stably-expressed T7-tagged L1-ORF1p upon depletion or  
1331 overexpression of let-7. Stable Flp-In-293 cells expressing T7-tagged L1-ORF1p  
1332 were transfected with let-7 inhibitor or mimic, or their controls (c- and scr,  
1333 respectively). HMGA2 was used as a positive control. Western blot (left) and its  
1334 quantification by Odyssey (right) are shown. Error bars indicate s.d. of two  
1335 replicates. \* $p < 0.05$ . **(e-f)** Transfection control for western blot shown in Fig. 5c.  
1336 Plasmid levels (pSA500) upon let-7 overexpression **(e)** or depletion **(f)** were  
1337 analyzed by qPCR using two different pairs of primers: CMV and EBNA.  
1338 Genomic GAPDH was used to normalize. Error bars represent s.d of three  
1339 replicates. **(g)** Scheme of the different derivatives of pSA500 generated by  
1340 insertion of different sequences in its 3'UTR: 'scrb', 'bs2rh' and '8mer'. Different  
1341 nucleotides in 8mer compared to bs2rh are shown in red. **(h)** RT-qPCR analysis  
1342 of ORF2-F, EBNA and DICER mRNA levels upon let-7 overexpression. HeLa  
1343 cells were transfected with one of the three pSA500 3'UTR derivatives shown in  
1344 **(g)** and let-7 mimic. Graph shows the RNA levels of the different mRNAs upon  
1345 let-7 overexpression, relative to the scr condition, in each case. EBNA was used  
1346 to normalize ORF2-F levels, and GAPDH was used to normalize EBNA and

1347 DICER. **(i)** Western blot analyses of L1-ORF2p-FLAG upon let-7  
1348 overexpression. A fraction of cells from **(h)** were used. L1-ORF2p was detected  
1349 using a FLAG antibody. DICER, a known let-7 target, was used as a positive  
1350 control. Representative well and quantification of the western blot are shown.  
1351 Error bars represent s.d of three replicates. P values are shown. **(j)** Scheme of  
1352 pSA500 ORF2-8mer generated by mutation of two nucleotides in the sequence  
1353 of bs2rh. Different nucleotides and aminoacids in 8mer compared to bs2rh are  
1354 shown in red. **(k)** RT-qPCR analysis of ORF2-F, EBNA and DICER mRNA levels  
1355 upon let-7 overexpression. HeLa cells were transfected with pSA500 and  
1356 pSA500ORF2-8mer showed in **(j)** and let-7 mimic. Graph shows the RNA levels  
1357 of the different mRNAs upon let-7 overexpression, relative to the scr condition,  
1358 in each case. EBNA was used to normalize ORF2-F levels, and GAPDH was  
1359 used to normalize EBNA and DICER. **(i)** Western blot analyses of L1-ORF2p-  
1360 FLAG upon let-7 overexpression. A fraction of cells from **(k)** were used. L1-  
1361 ORF2p was detected using a FLAG antibody. DICER, a known let-7 target, was  
1362 used as a positive control. Representative well and quantification of the western  
1363 blot are shown. Error bars represent s.d. of three replicates. P values are shown.  
1364 **(n)** Western blot analysis of ORF1p-GFP expression from different plasmids.  
1365 pCEP4 was used as a negative control. Two blots were incubated in parallel  
1366 with anti-ORF1p and anti-GFP antibodies. **(o)** Cell culture-based  
1367 retrotransposition assay comparing retrotransposition efficiency of different  
1368 constructions. HeLa cells were transfected with either JM101/L1.3, pVan583 or

1369 JM105/L1.3 and selected with neomycin. Quantification (corrected for  
1370 transfection efficiency, shown in **(p)** is shown in the right. **(p)** Transfection  
1371 efficiency comparison between JM101/L1.3 and pVan583. HeLa cells were  
1372 transfected with one of the constructs, and plasmid levels were quantified by  
1373 qPCR. **(o,p)** As negative control a mutant construct containing a missense  
1374 mutation in the RT domain (D702A) was used (JM105/L1.3) **(q)** U2-OS cells  
1375 were co-transfected with pVAN583 and let-7 mimic or its control (scr), and  
1376 fluorescence was analyzed by confocal microscopy. Arrows indicate L1-ORF1p-  
1377 EGFP or L1-ORF2p-mCherry foci.

1378 **Supplementary Figure 6. Uncropped versions of the western blots shown in**  
1379 **this study.**

1380 **Supplementary Table I. Summary of L1 insertions found by MELT.**

1381 **Supplementary Table II. Description of tumor-specific L1 insertions found**  
1382 **by MELT.**

1383 **Supplementary Table III. Multiple t-tests of lung cancer-related miRNA**  
1384 **expression in samples with/without insertions (found by MELT).**

1385 **Supplementary Table IV. Rank-sum test of lung cancer-related miRNA**  
1386 **expression in samples with/without insertions (found by MELT).**



1387 **Supplementary Table V. Multiple t-tests of lung cancer-related miRNA**  
1388 **expression in samples after randomization of the number of insertions**  
1389 **(found by MELT).**

1390 **Supplementary Table VI. Multiple t-tests of miRNA expression in samples**  
1391 **with/without insertions (found by MELT), including all miRNAs expressed**  
1392 **in lung cancer.**

1393 **Supplementary Table VII. Multiple t-tests of lung cancer-related miRNA**  
1394 **expression in samples with/without insertions (found by Transpo-Seq).**

1395 **Supplementary Table VIII. Multiple t-tests of miRNA expression in samples**  
1396 **with/without insertions (found by Transpo-Seq), including all miRNAs**  
1397 **expressed in lung cancer.**

1398 **Supplementary Table IX. Multiple t-tests of lung cancer-related miRNA**  
1399 **expression in samples after randomization of the number of insertions**  
1400 **(found by Transpo-Seq).**

1401 **Supplementary Table X. Multiple t-tests of lung cancer-related miRNA**  
1402 **expression in breast cancer samples with/without insertions (found by**  
1403 **Transpo-Seq).**

1404 **Supplementary Table XI. Primers used in this study.**

1405

**a**

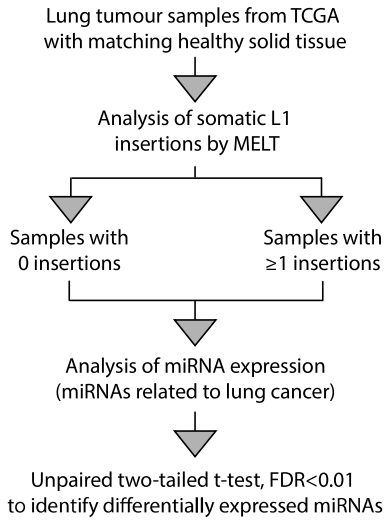

**b**

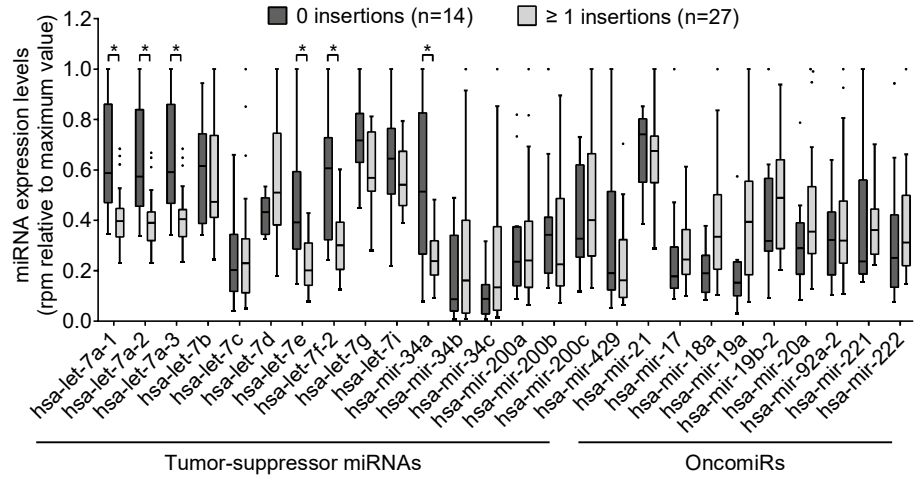

**Fig 2**

bioRxiv preprint doi: <https://doi.org/10.1101/2020.06.18.158667>; this version posted June 19, 2020. The copyright holder for this preprint (which was not certified by peer review) is the author/funder. All rights reserved. No reuse allowed without permission.

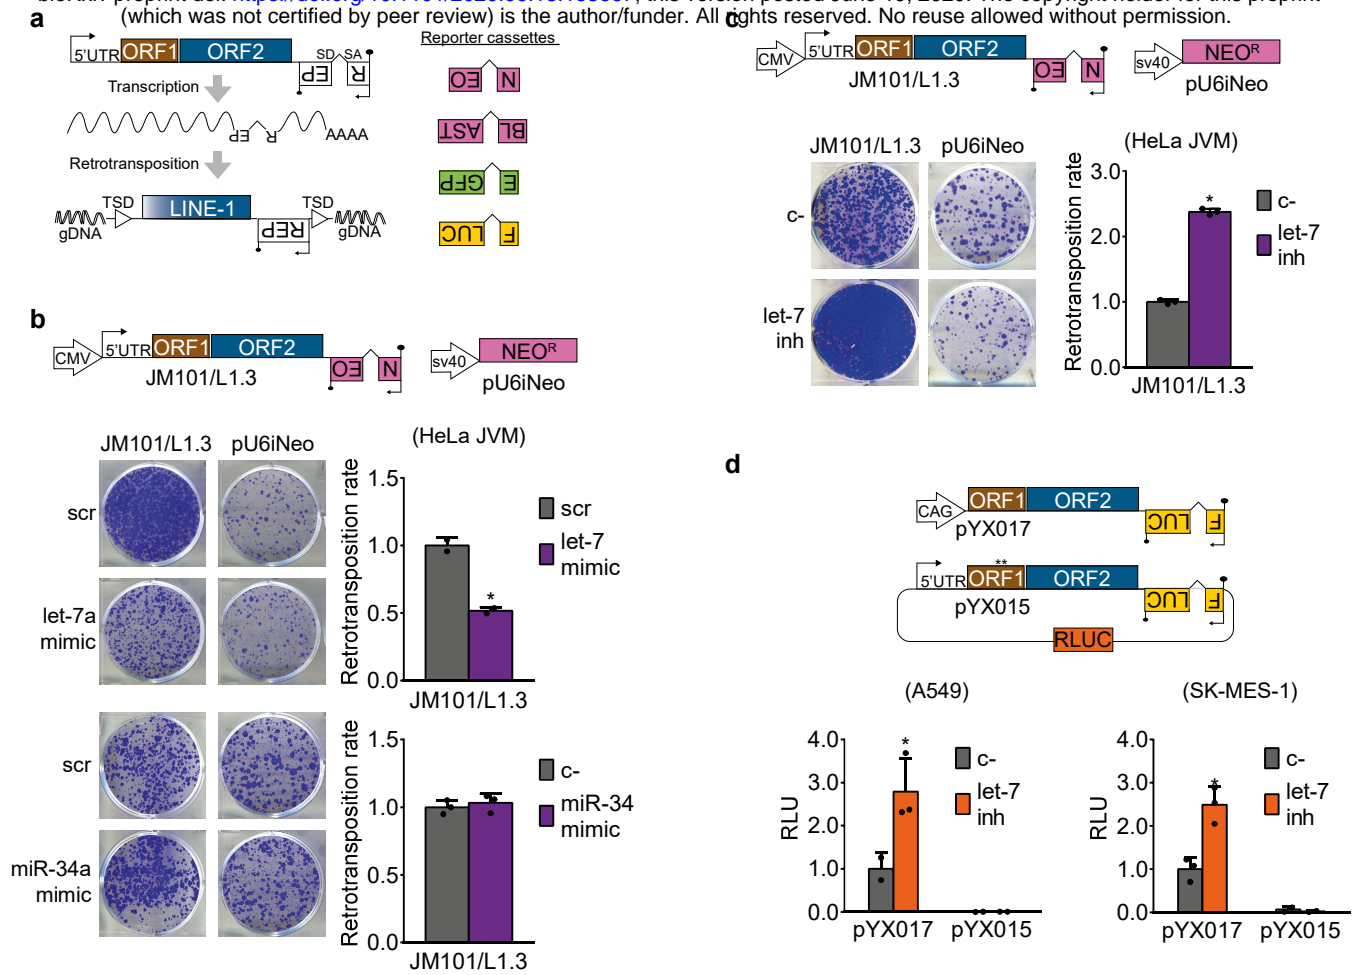

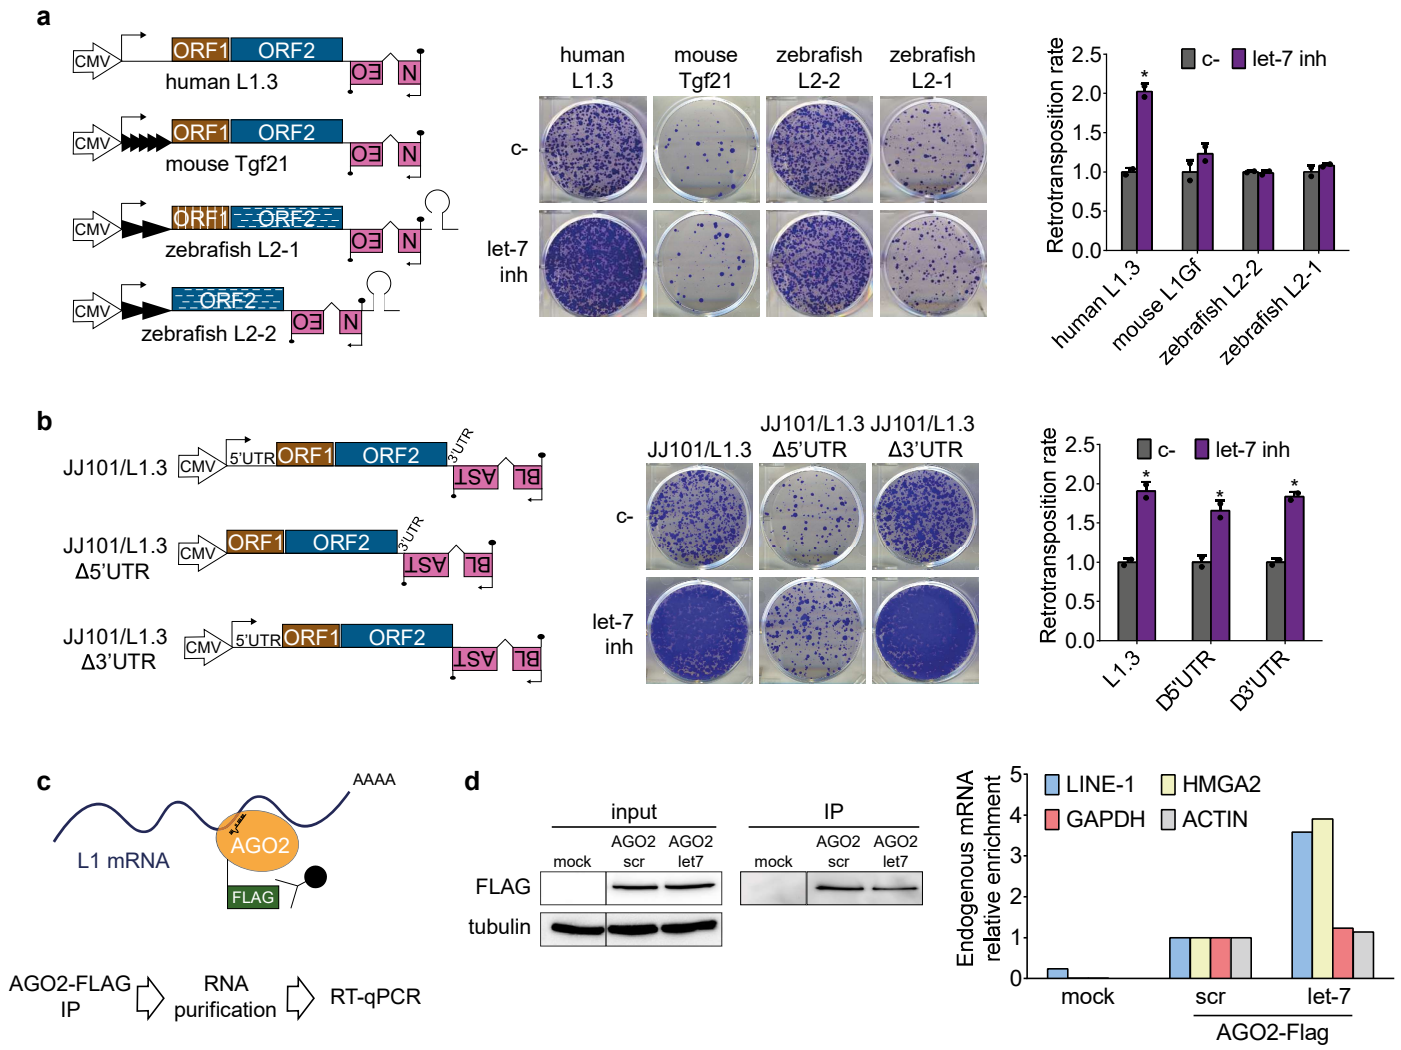

**Fig 4**

bioRxiv preprint doi: <https://doi.org/10.1101/2020.06.18.158667>; this version posted June 19, 2020. The copyright holder for this preprint (which was not certified by peer review) is the author/funder. All rights reserved. No reuse allowed without permission.

**a**

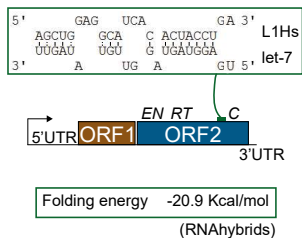

**b**

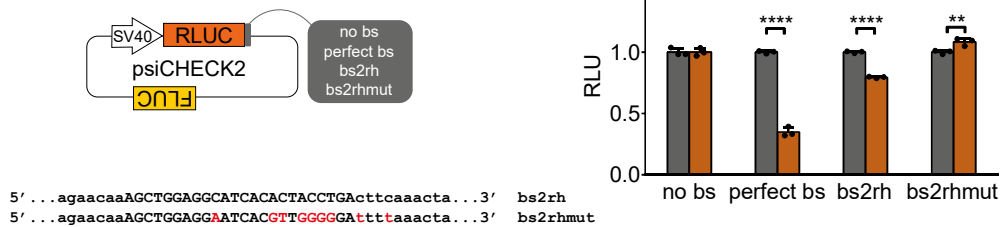

**c**

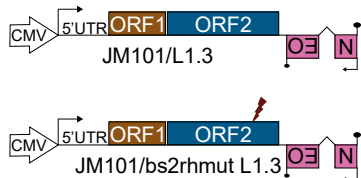

**d**

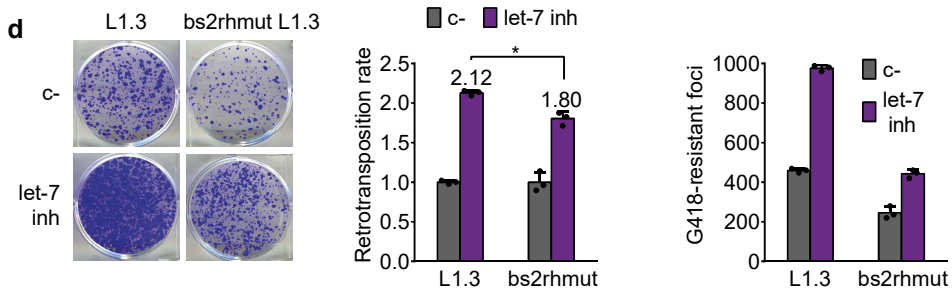

**Fig 5**

bioRxiv preprint doi: <https://doi.org/10.1101/2020.06.18.158667>; this version posted June 19, 2020. The copyright holder for this preprint (which was not certified by peer review) is the author/funder. All rights reserved. No reuse allowed without permission.

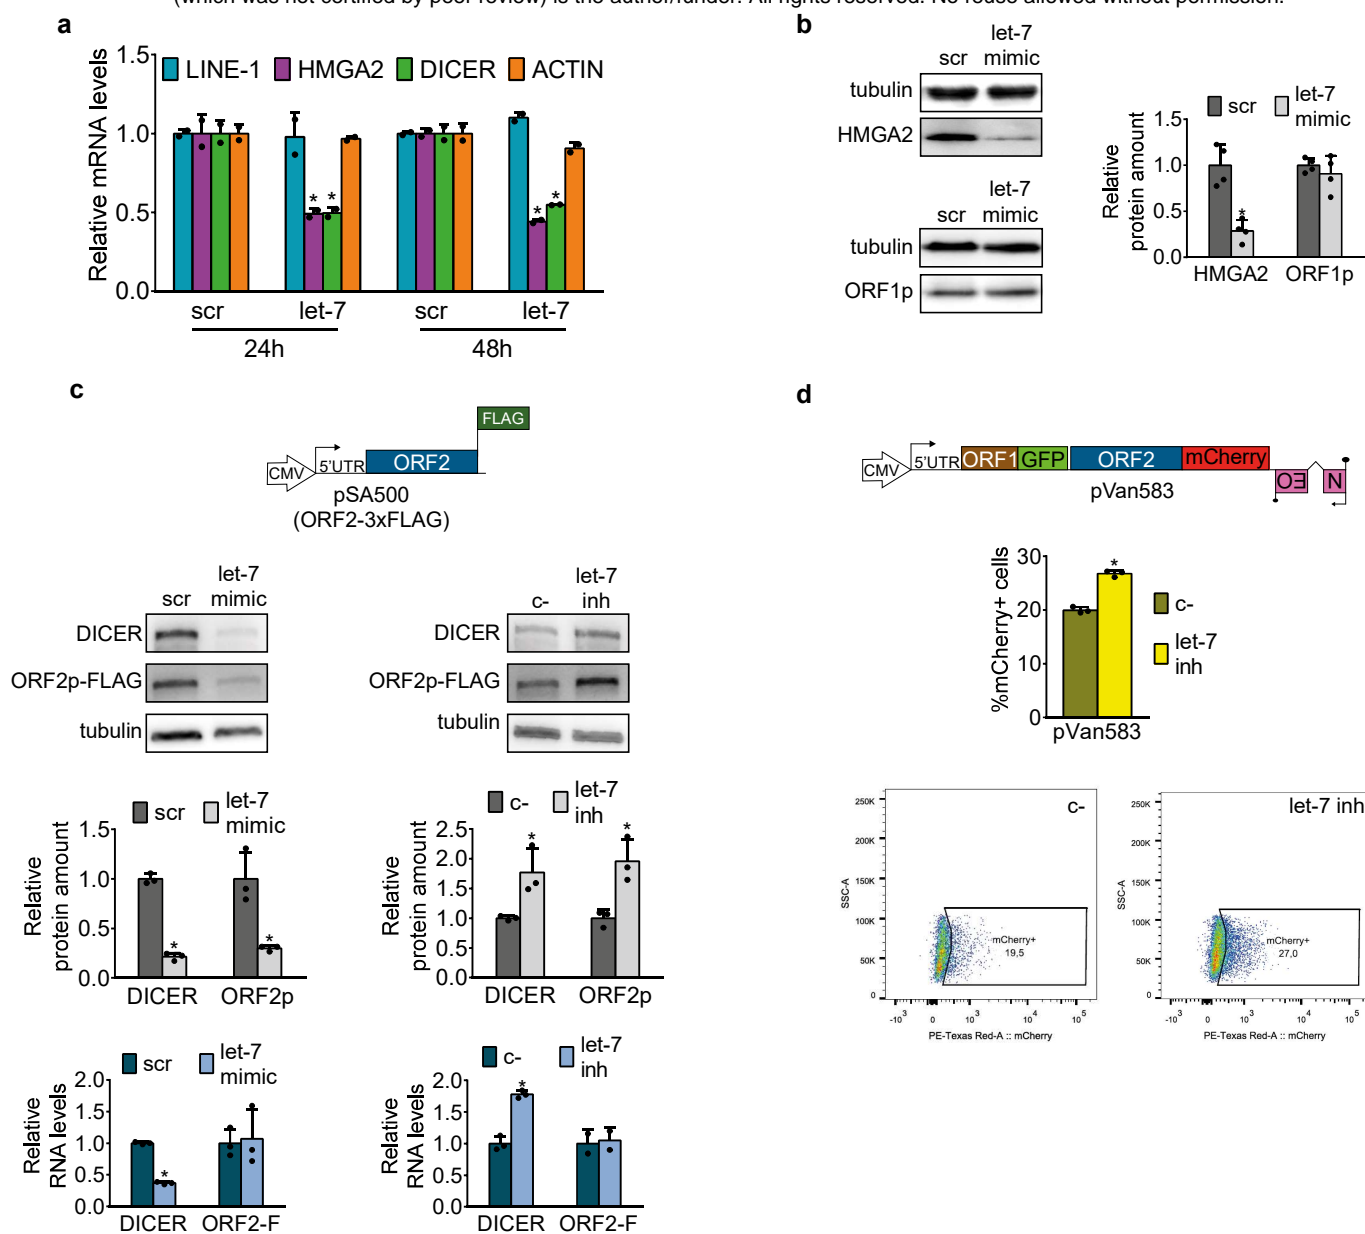

**Fig 6**

bioRxiv preprint doi: <https://doi.org/10.1101/2020.06.18.158667>; this version posted June 19, 2020. The copyright holder for this preprint (which was not certified by peer review) is the author/funder. All rights reserved. No reuse allowed without permission.

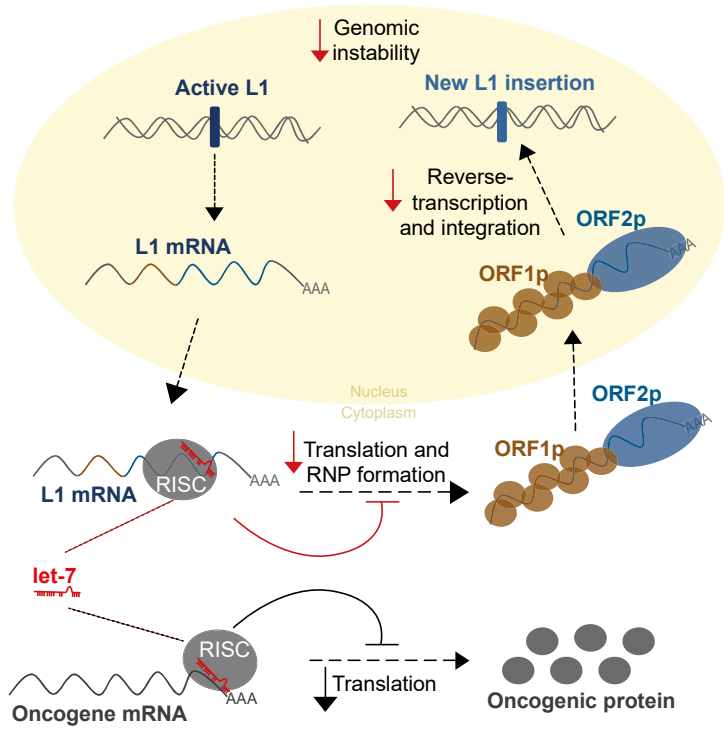

**a**

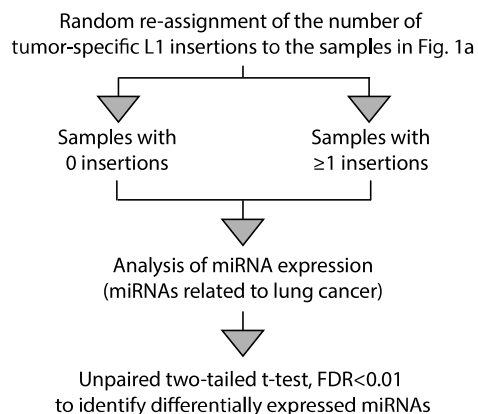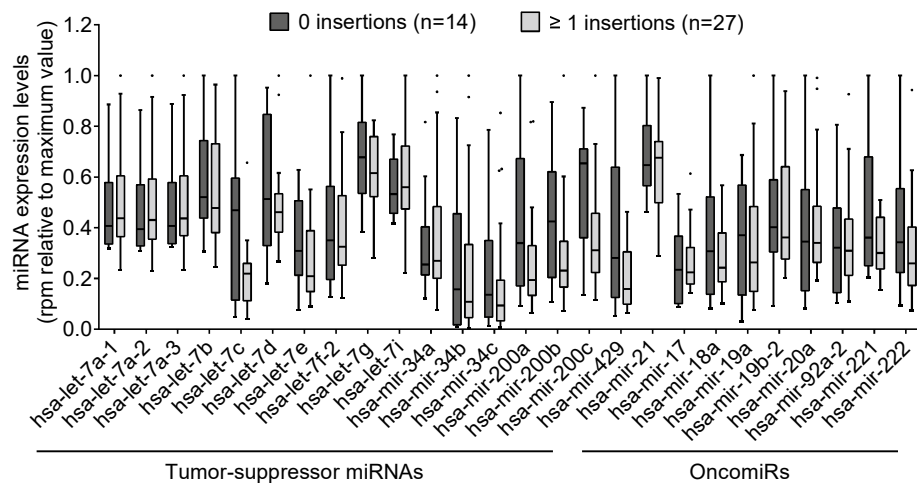

**b**

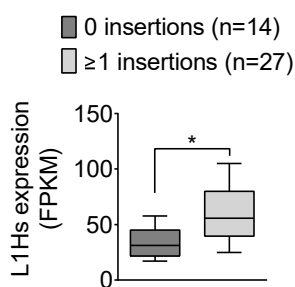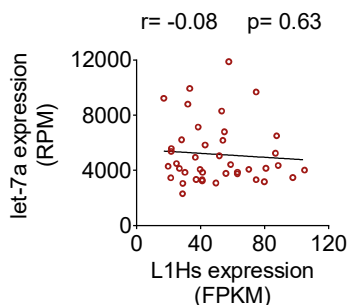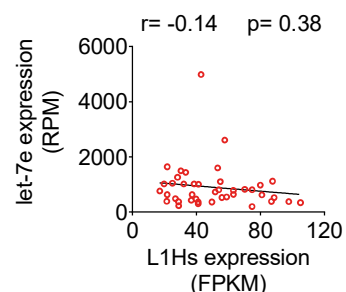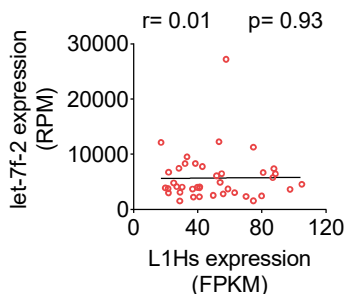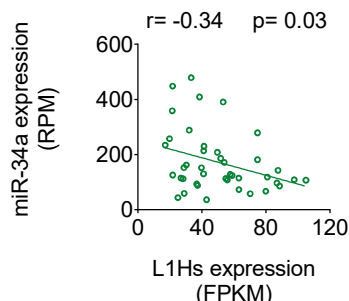

**c**

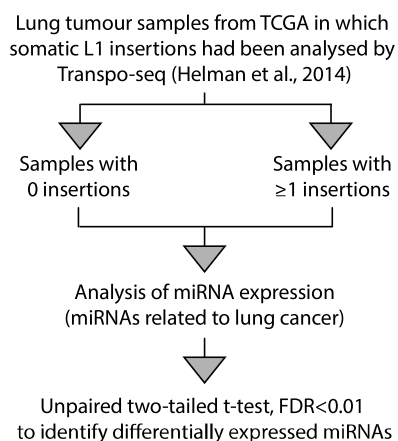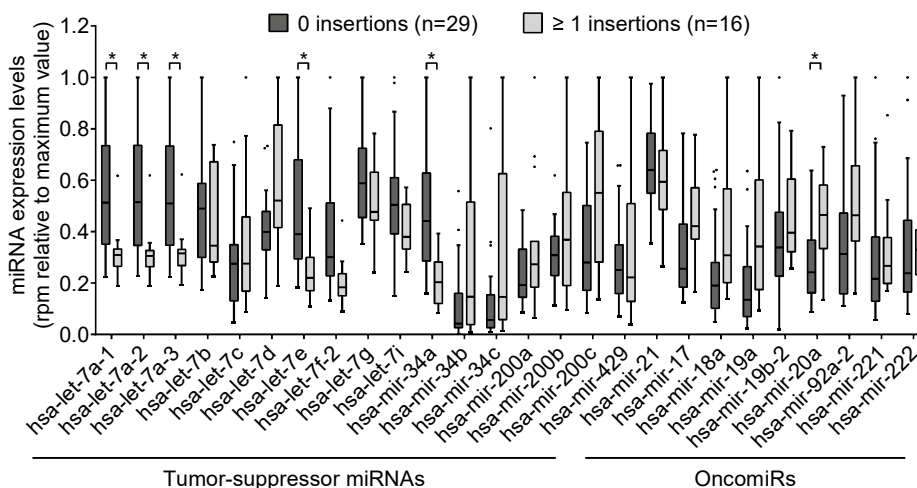



d

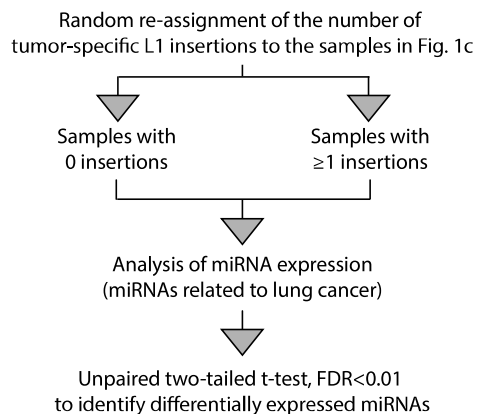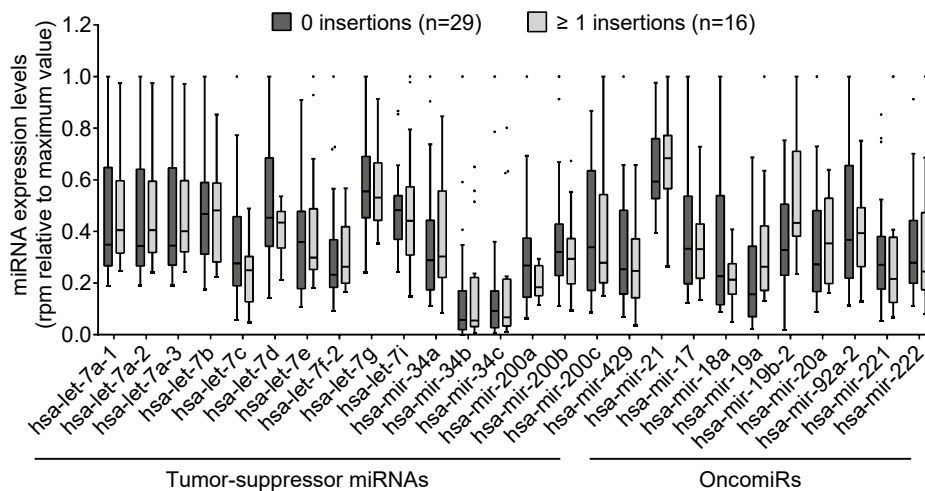

e

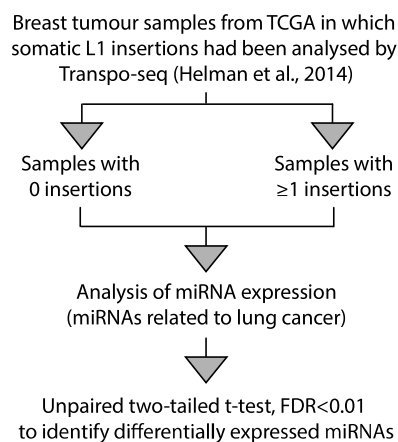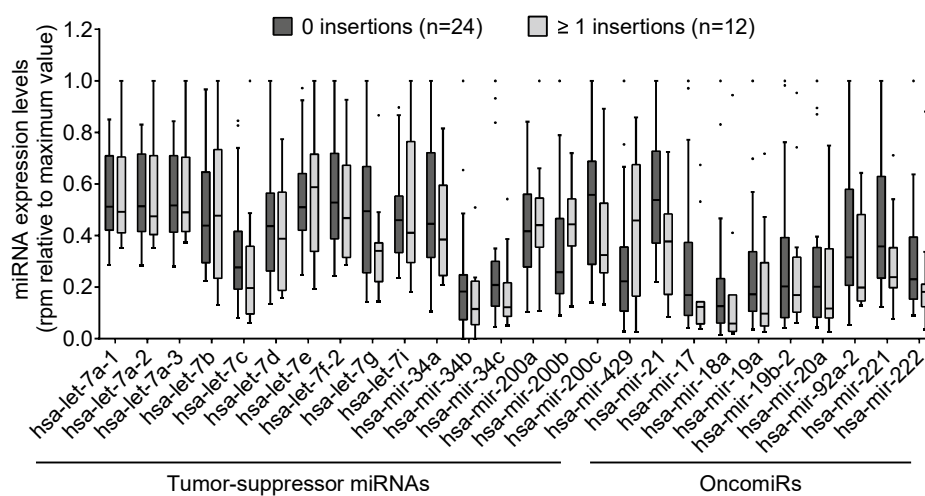

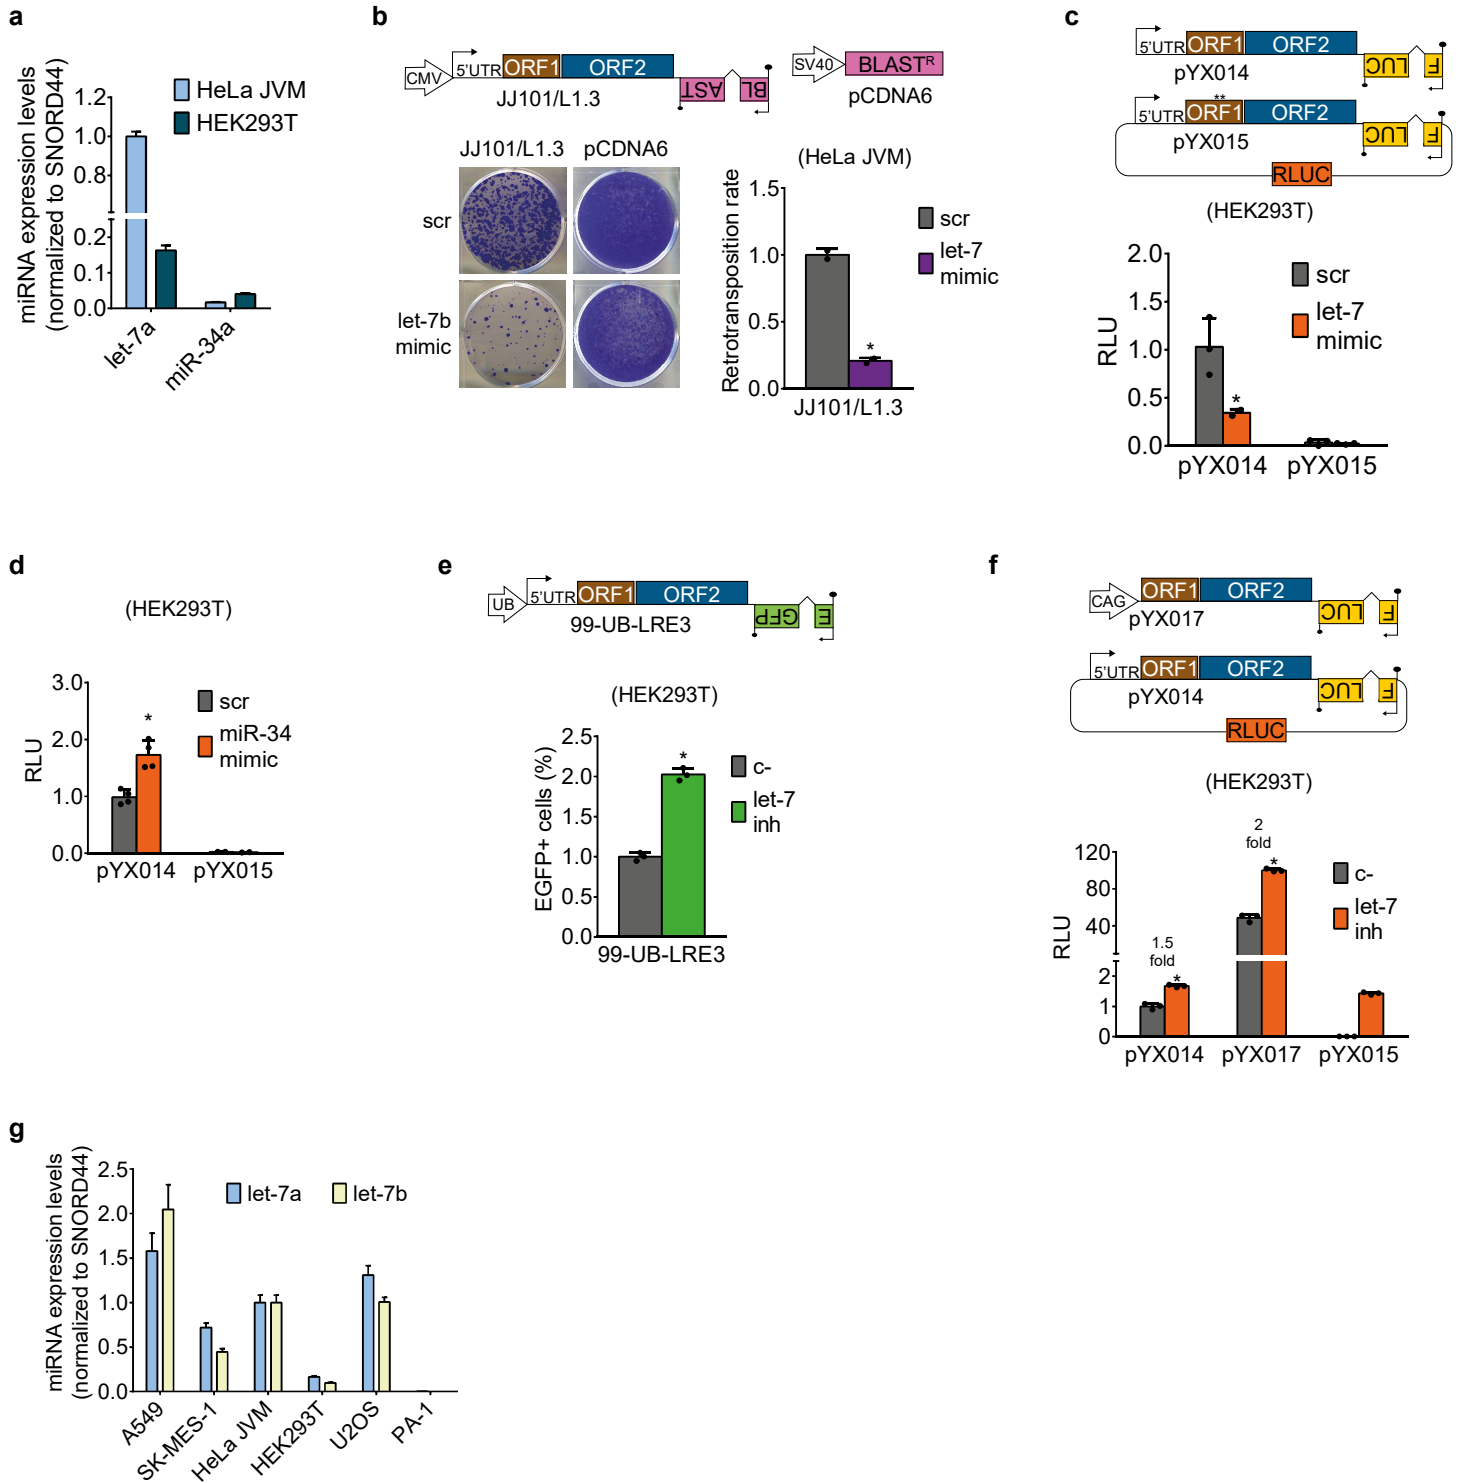

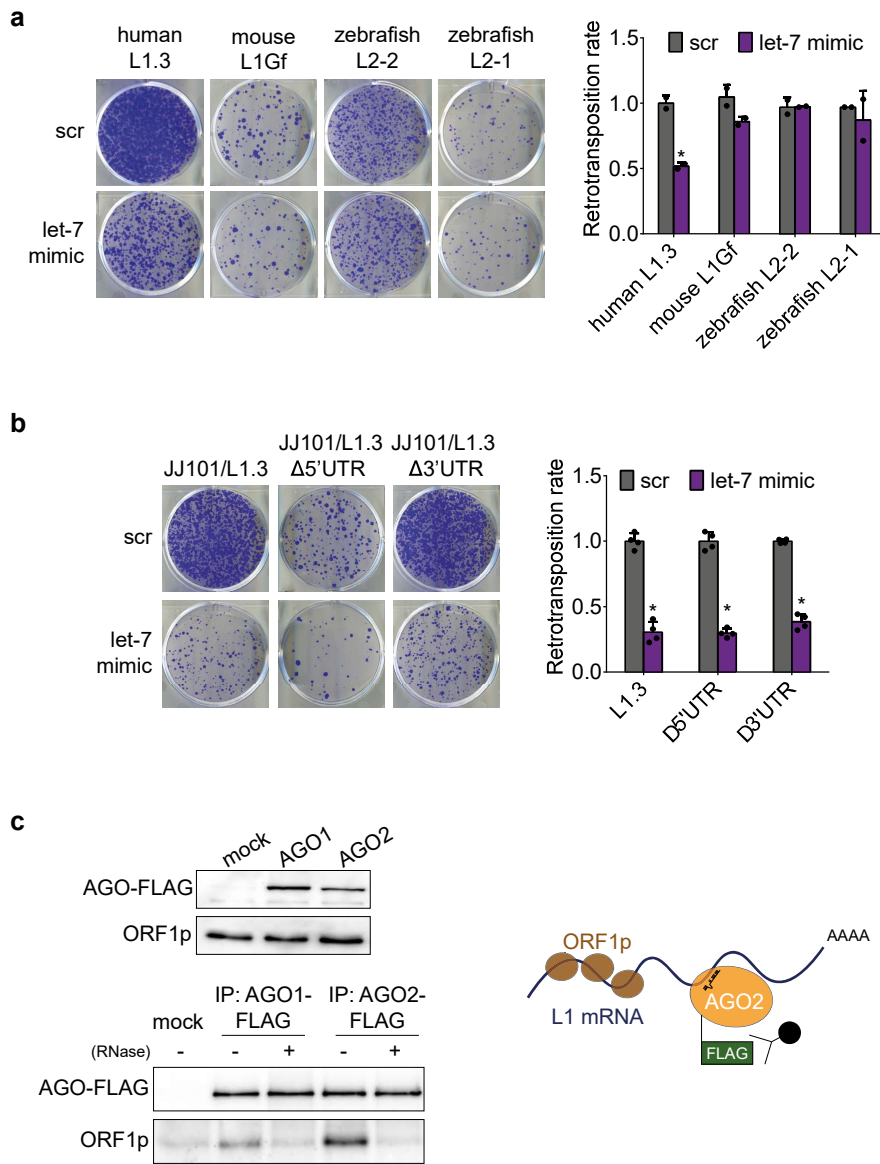

a

| bs1                    |   | Predicted binding site | Location (Pos in L1Hs) | Prediction method/software | dG    | Validated by siCHECK? |
|------------------------|---|------------------------|------------------------|----------------------------|-------|-----------------------|
| GAAATTATAACAAACTATCTCT | : |                        |                        |                            |       |                       |
| let-7a                 |   | bs (1)                 | ORF2 (2650-2671)       | mIRanda                    | -17.5 | NO                    |
| bs2                    |   | bs (2)                 | ORF2 (4596-4616)       | RNA22                      | -19.4 | YES                   |
| let-7b                 |   |                        |                        |                            |       |                       |

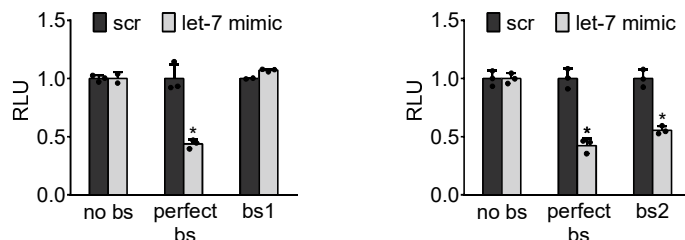

b

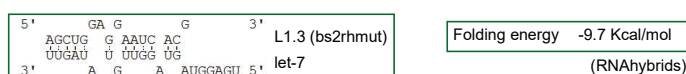

c

```
L1PA1      AAAAAAGAACAAAGCTGGAGGCATCACACTACCTGACTTCAAACCTAT 4618
L1PA2      AAAAAAGAACAAAGCTGGAGGCATCACACTACCTGACTTCAAACCTAT 4619
L1PA3      AAAAAAGAACAAAGCTGGAGGCATCACACTACCTGACTTCAAACCTAT 4749
L1PA4      AAAAAAGAACAAAGCTGGAGGCATCACACTACCTGACTTCAAACCTAT 4746
L1PA5      AAAAAAGAACAAAGCTGGAGGCATCACACTACCTGACTTCAAACCTAT 4742
L1PA6      AAAAAAGAACAAAGCTGGAGGCATCACGCTACCTGACTTCAAACCTAT 4733
L1PA7      AAAAAAGAACAAAGCTGGAGGCATCACGCTACCTGACTTCAAACCTAT 5065
L1PA8      AAAAAAGAACAAAGCTGGAGGCATCACGCTACCTGACTTCAAACCTAT 5059
L1PA8A     AAAAAAGAACAAAGCTGGAGGCATCACGCTACCTGACTTCAAACCTAT 5047
L1PA10     AAAAAAGAACAAAGCTGGAGGCATCACGCTACCCGACTTCAAACCTAT 4987
L1PA11     AAAAAAGAACAAAGCTGGAGGCATCACGCTACCTGACTTCAAACCTAT 5118
L1PA12     AAAAAAGAACAAAGCTGGAGGCATCACGCTACCCGACTTCAAACCTAT 6380
L1PA13A    AAAAAAGAACAAAGCTGGAGGCATCACGCTACCTGACTTCAAACCTAT 5336
L1PA13B    AAAAAAGAACAAAGCTGGAGGCATCACACTACCTGACTTCAAACCTAT 5100
L1PA14     AAAAAAGAACAAAGCTGGAGGCATCACATACCTGACTTCAAACCTAT 5896
L1PA15A    AAAAAAGAACAAAGCTGGAGGCATCACATACCTAACCTTCAAACCTAT 4796
L1PA15B    AAAAAAGAACAAAGCTGGAGGCATCACATACCTAACCTTCAAACCTAT 5203
L1PA16     AAAAAAGAACAAAGCTGGAGGCATCACATACCCGACTTCAAACCTAT 5431
*****
```

d

```
Human_L1.3  AAGAACAAAGCTGGAGGCATCACACTACCTGACTTCAAACCTATACTAC
Human_LRE3  AAGAACAAAGCTGGAGGCATCACACTACCTGACTTCAAACCTATACTAC
Human_L1RP  AAGAACAAAGCTGGAGGCATCACACTACCTGACTTCAAACCTATACTAC
Mouse_L1Gf  AAAAGAACCTCTGGTGAATCACCATGCCTGACCTAACGCTTTACTAC
** * * * * * * * * * * * * * * * * * * * * * * * * * * * *
```

```
Human_L1.3-ORF2p  ELEKTTTLKFIWNQKRARIAKSILSQKNKAGGITLPDFKLYYKATVTKTAWYWYQNRDIDQ 898
Human_LRE3-ORF2p  ELEKTTTLKFIWNQKRARIAKSILSQKNKAGGITLPDFKLYYKATVTKTAWYWYQNRDIDQ 898
Human_L1RP-ORF2p  ELEKTTTLKFIWNQKRARIAKSILSQKNKAGGITLPDFKLYYKATVTKTAWYWYQNRDIDQ 898
Mouse_L1Gf-ORF2p  ELEGAIKCFIWNKPKPRIAKTLLKDKR TSGGITMPDLKLYYRAIVIKTAWYWYRDRQVDQ 905
Zebrafish_L2.1-ORF2p  HITPILSSLHLWLPVKFRIEFKIL-----LLTYKALNLLAPVYLTNL----- 797
Zebrafish-L2.2-ORFp  HVTPLLVRHLWLPVAARIKFKTL-----MFAYKVTSGLAPSYLHSL----- 893
.:          : *      **   . *          : *.:          : *
```

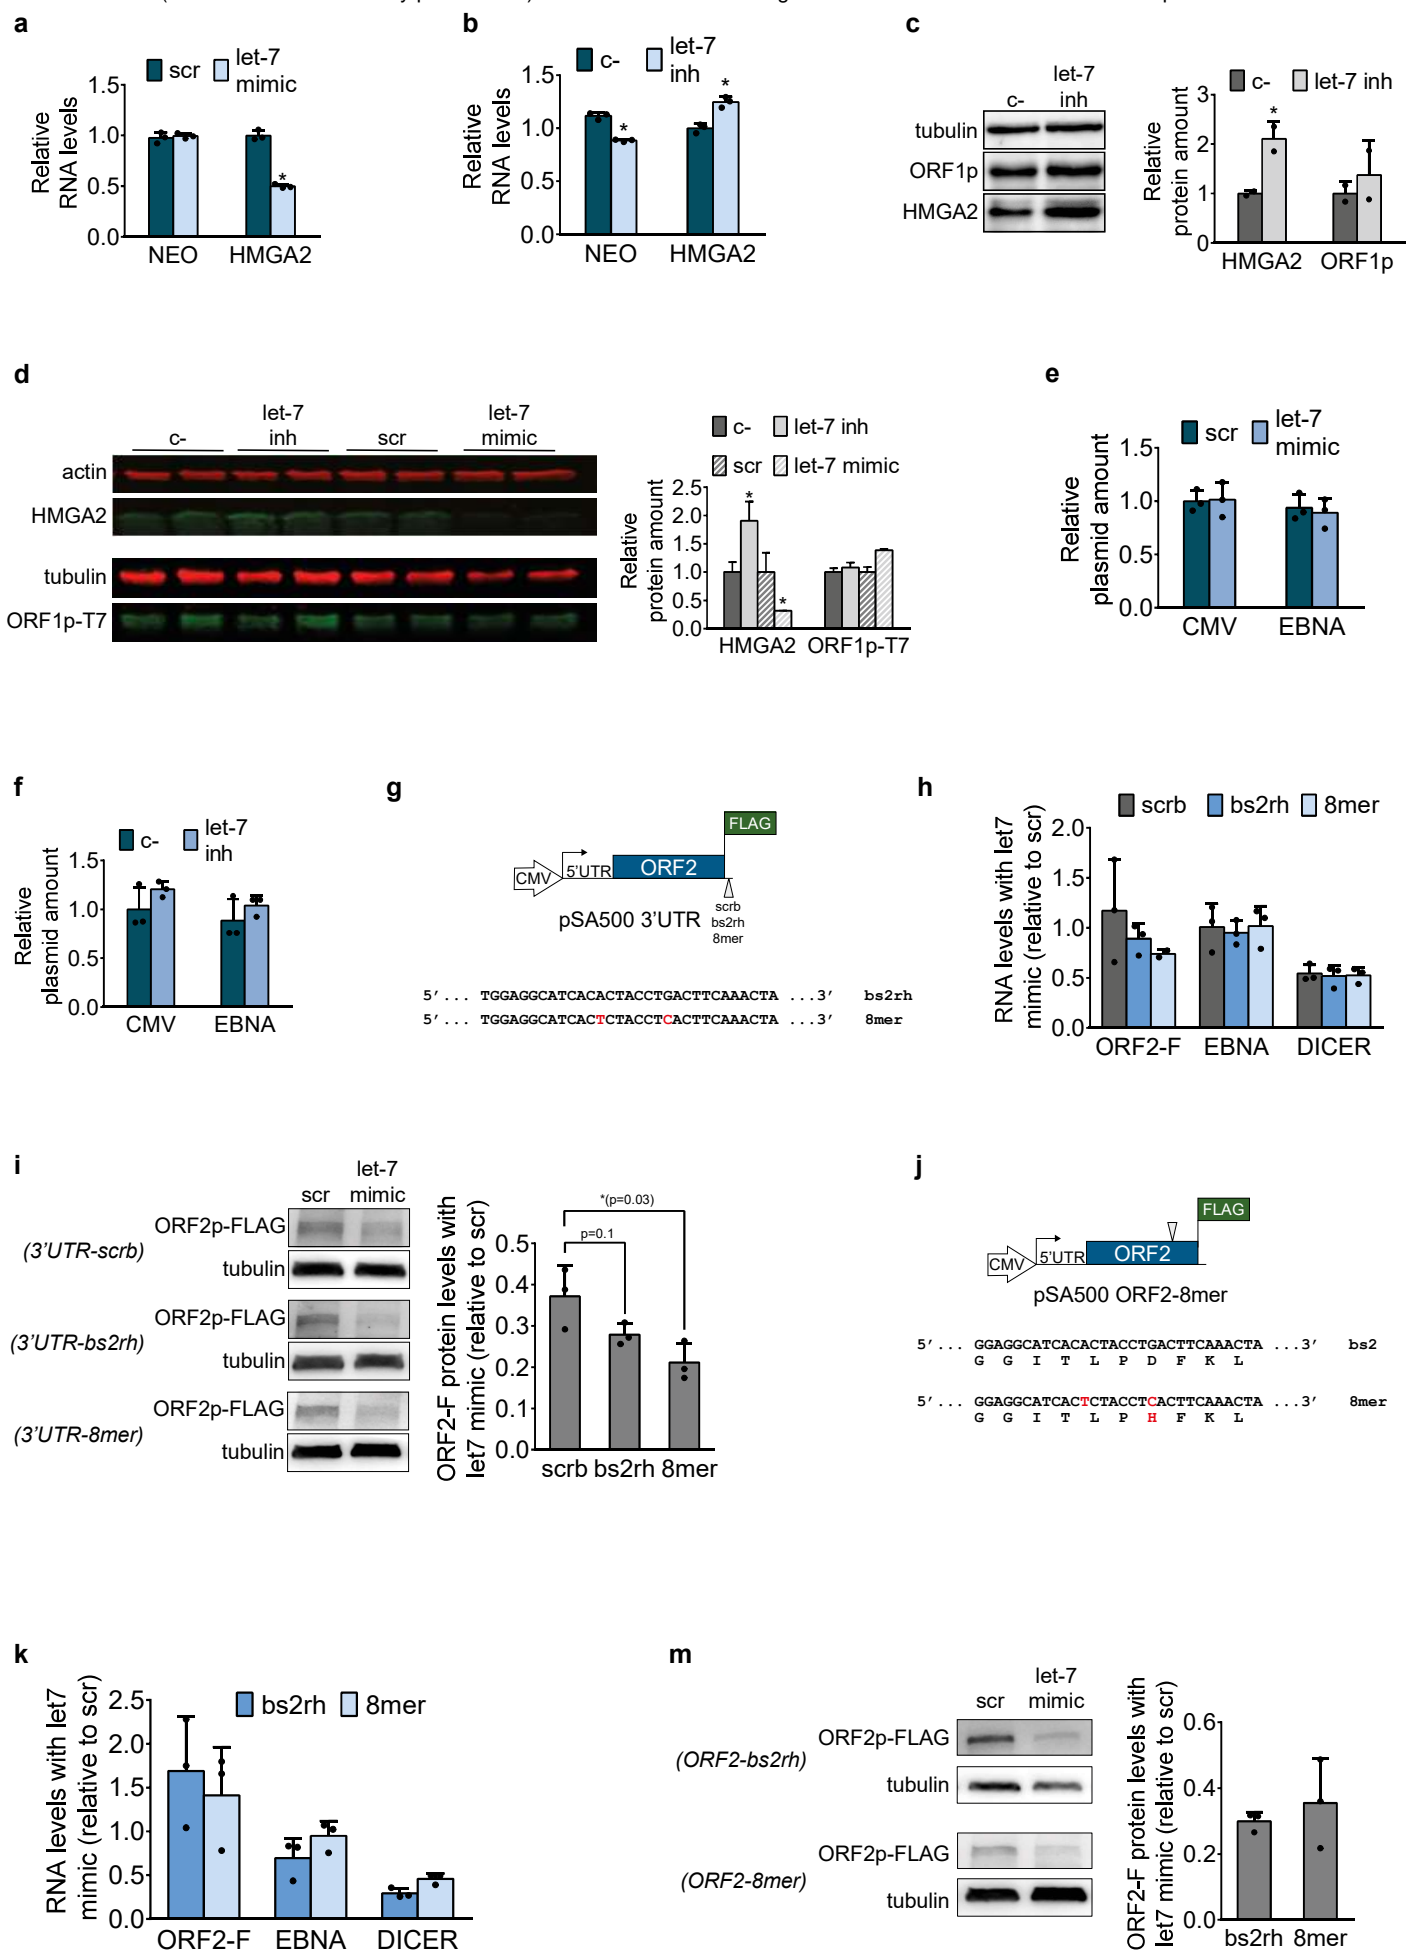

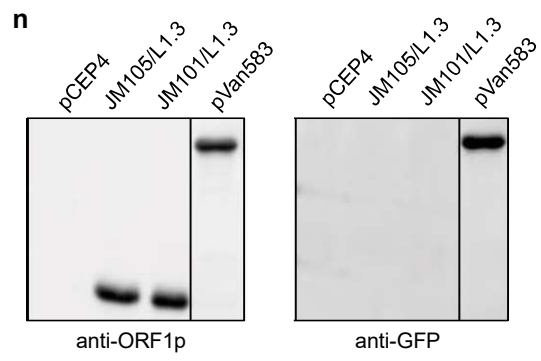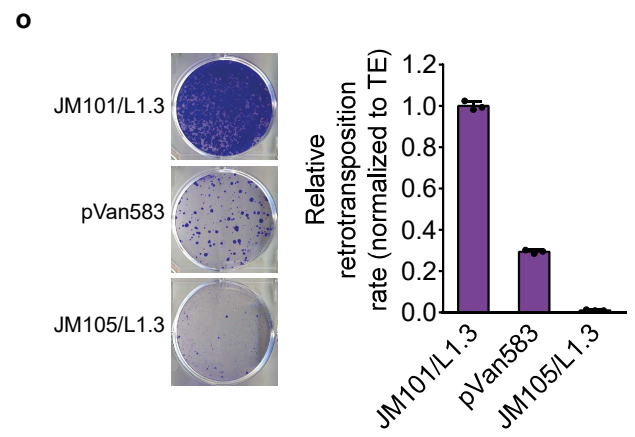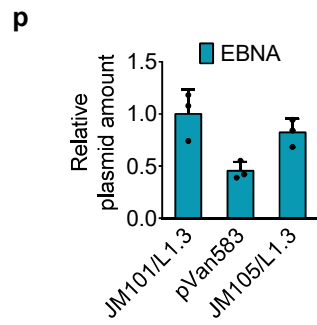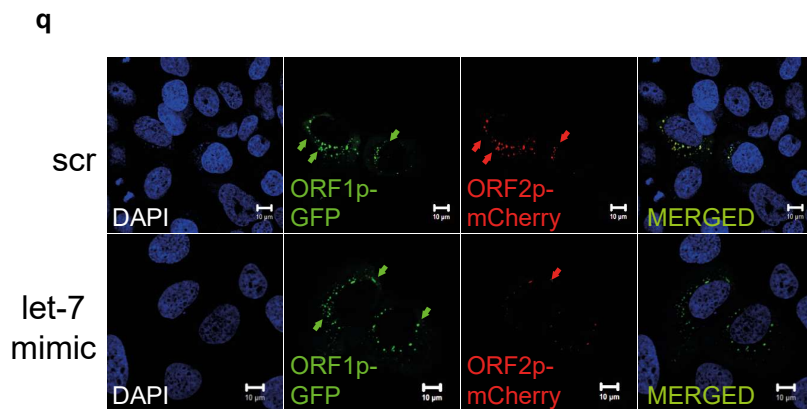

## Supp Fig 6

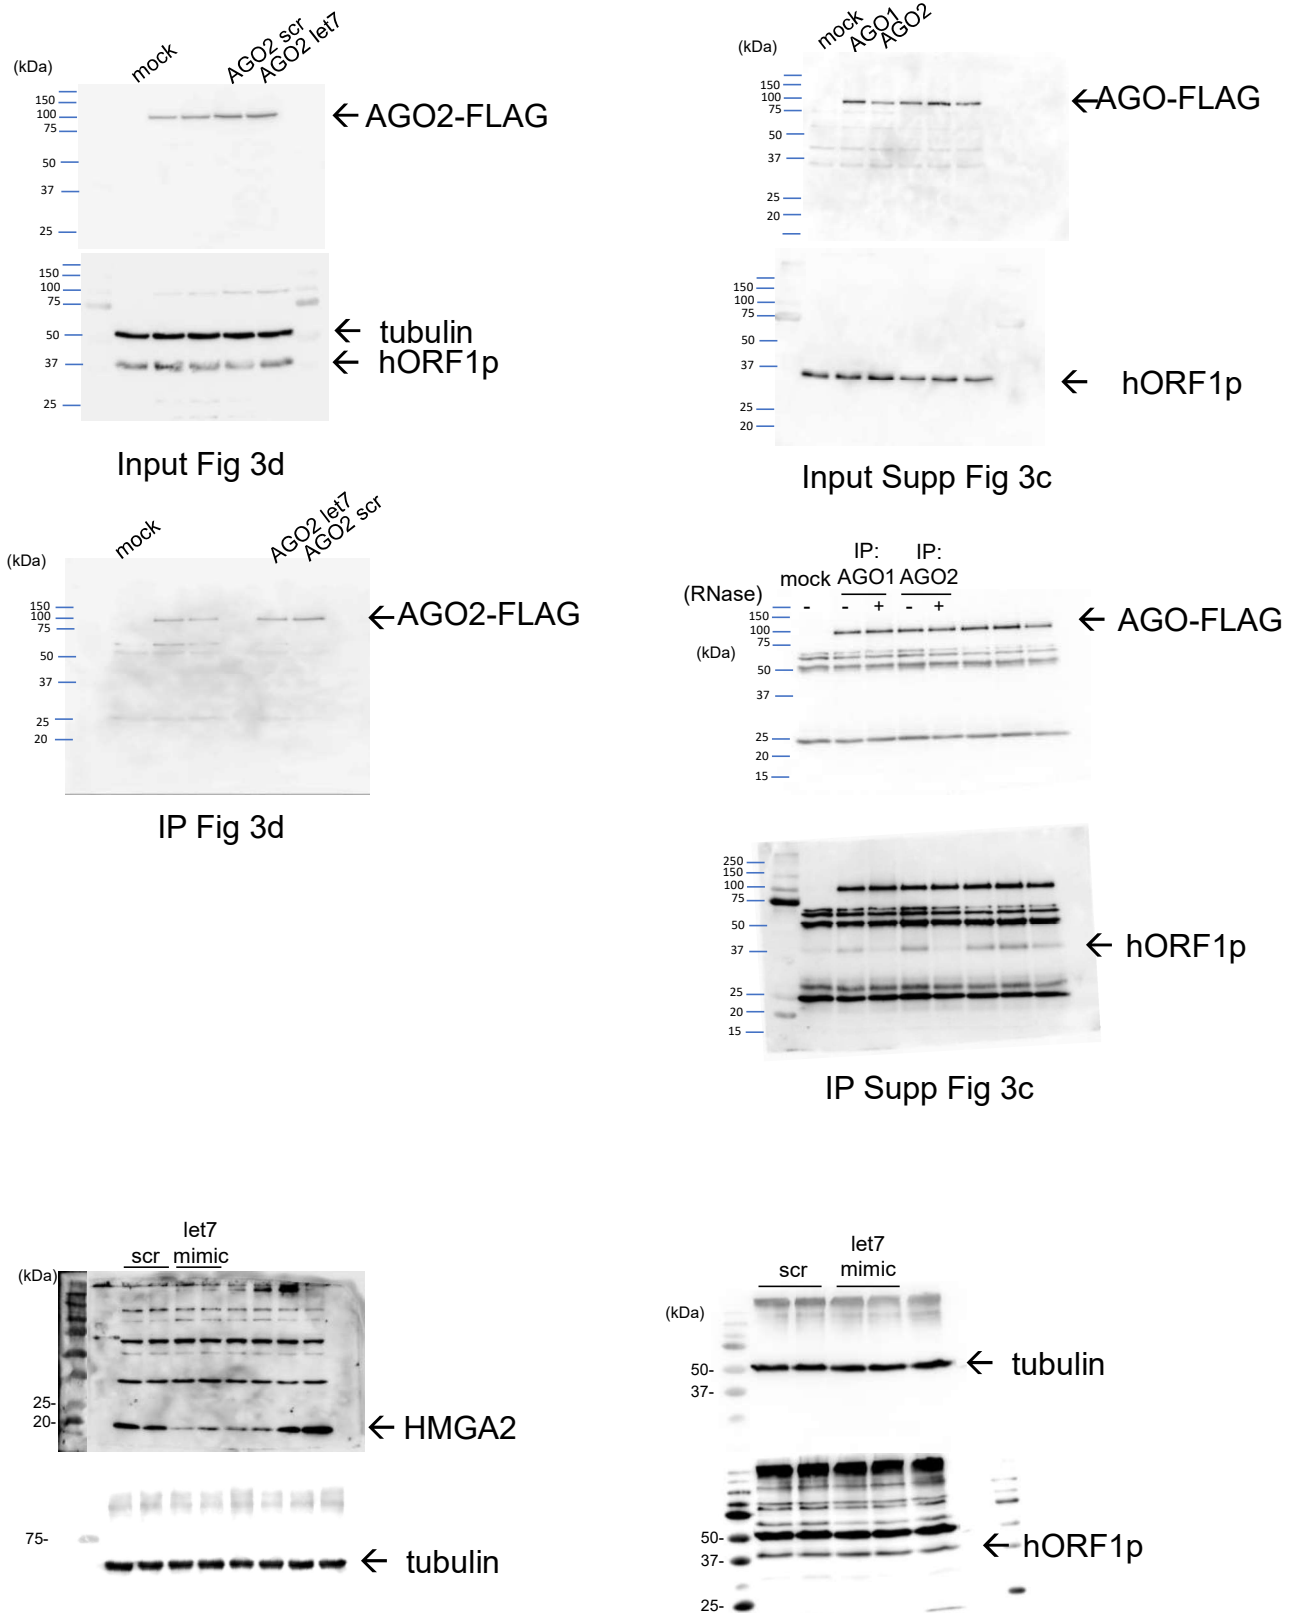

Fig 5b

### Supp Fig 6

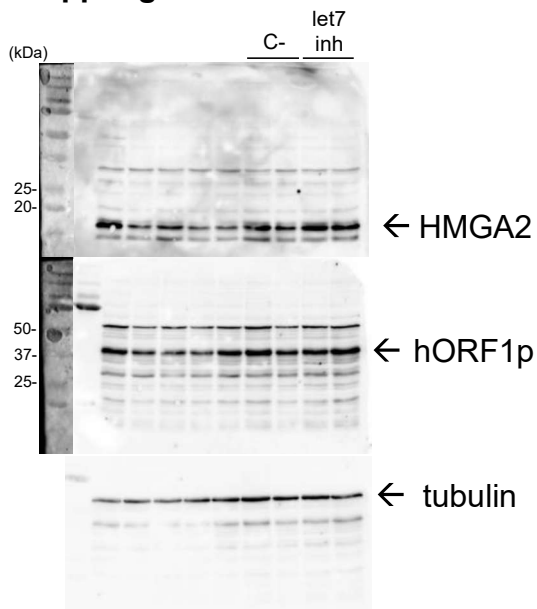

Supp Fig 5c

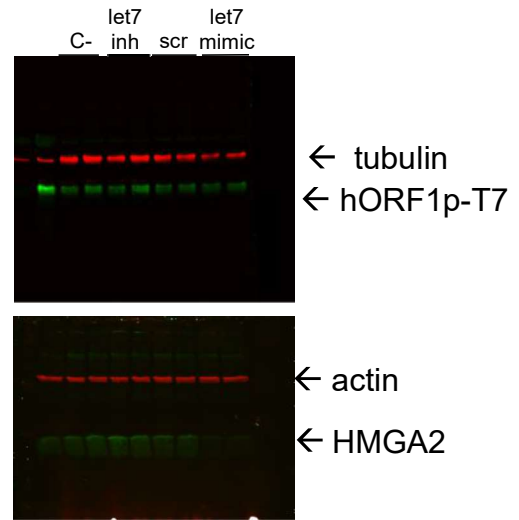

Supp Fig 5d

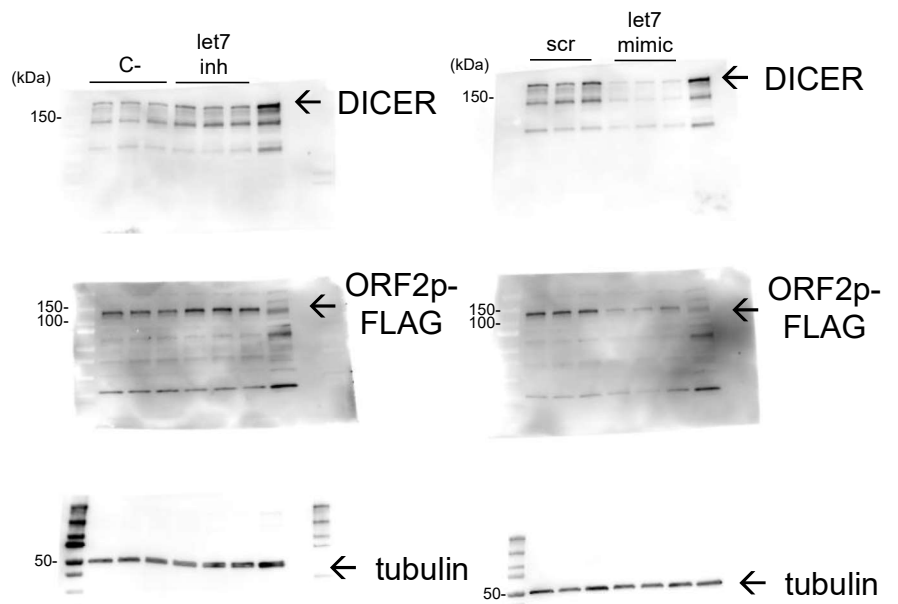

Fig 5c

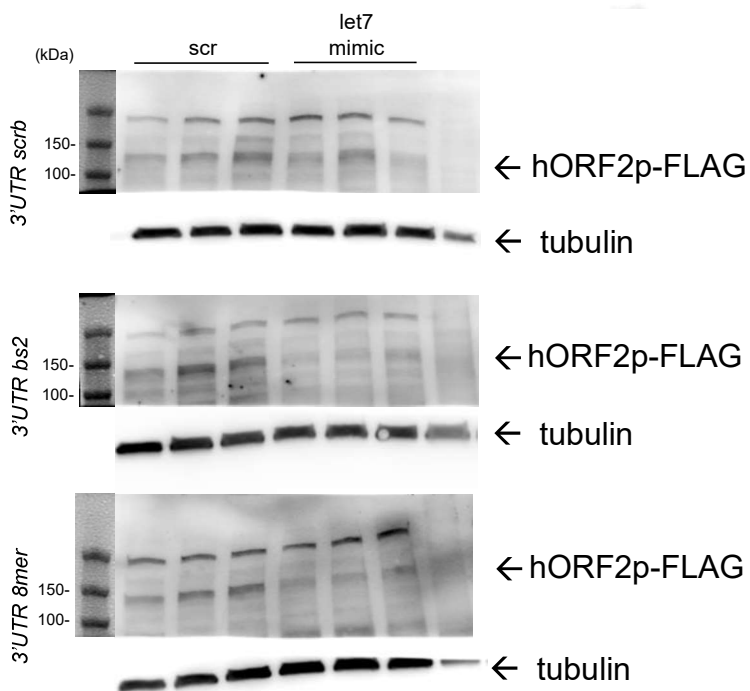

Supp Fig 5i

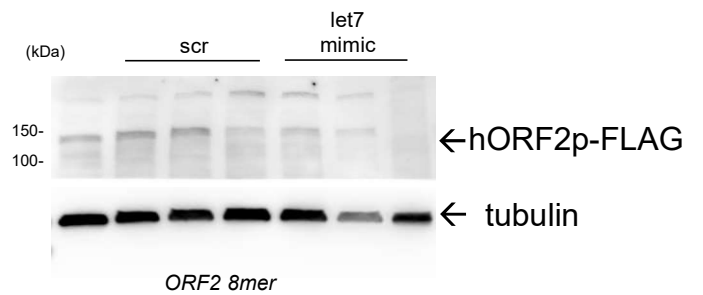



| Sample           | Types of tumor | Coverages |      | Unfiltered Poly L1 |     |        | MELT insertion calls |    |       |         |         |             |   |   |      |      |      |
|------------------|----------------|-----------|------|--------------------|-----|--------|----------------------|----|-------|---------|---------|-------------|---|---|------|------|------|
|                  |                | PT        | NT   | PT                 | NT  | Common | PT                   | NT | NT-PT | Poly PT | Poly NT | Poly Common |   |   |      |      |      |
|                  |                |           |      |                    |     |        |                      |    |       |         |         |             |   |   |      |      |      |
| TCGA-18-3408     | LUSC           | 70.3      | 34.5 | 138                | 136 | 98     | 9                    | 0  | 0     | 48      | 43      | 43          |   |   |      |      |      |
| TCGA-18-3415     | LUSC           | 76.0      | 38.0 | 141                | 134 | 95     | 26                   | 0  | 0     | 35      | 34      | 31          |   |   |      |      |      |
| TCGA-18-4721     | LUSC           | 69.5      | 44.6 | 138                | 141 | 102    | 16                   | 0  | 1     | 56      | 57      | 54          |   |   |      |      |      |
| TCGA-21-1076     | LUSC           | 54.0      | 38.3 | 133                | 126 | 93     | 5                    | 0  | 0     | 29      | 28      | 27          |   |   |      |      |      |
| TCGA-21-1078     | LUSC           | 44.4      | 45.3 | 118                | 120 | 78     | 0                    | 1  | 0     | 14      | 15      | 14          |   |   |      |      |      |
| TCGA-21-1083     | LUSC           | 89.3      | 65.4 | 129                | 130 | 105    | 29                   | 0  | 1     | 50      | 50      | 48          |   |   |      |      |      |
| TCGA-22-5477     | LUSC           | 56.0      | 44.2 | 126                | 131 | 94     | 17                   | 0  | 0     | 45      | 47      | 42          |   |   |      |      |      |
| TCGA-22-5485     | LUSC           | 95.4      | 41.1 | 133                | 136 | 97     | 19                   | 0  | 0     | 53      | 55      | 50          |   |   |      |      |      |
| TCGA-22-5492     | LUSC           | 81.0      | 32.8 | 136                | 140 | 103    | 20                   | 0  | 0     | 45      | 47      | 42          |   |   |      |      |      |
| TCGA-33-4586     | LUSC           | 70.3      | 37.9 | 134                | 144 | 91     | 12                   | 0  | 0     | 38      | 42      | 35          |   |   |      |      |      |
| TCGA-34-2596     | LUSC           | 51.8      | 45.6 | 213                | 136 | 84     | 55                   | 0  | 1     | 37      | 41      | 32          |   |   |      |      |      |
| TCGA-34-2600     | LUSC           | 37.9      | 62.2 | 110                | 132 | 70     | 6                    | 0  | 0     | 27      | 33      | 23          |   |   |      |      |      |
| TCGA-43-3394     | LUSC           | 47.2      | 46.4 | 138                | 147 | 108    | 5                    | 0  | 0     | 26      | 30      | 23          |   |   |      |      |      |
| TCGA-43-3920     | LUSC           | 71.9      | 35.2 | 110                | 113 | 81     | 8                    | 0  | 0     | 29      | 30      | 26          |   |   |      |      |      |
| TCGA-56-1622     | LUSC           | 44.3      | 41.9 | 111                | 124 | 78     | 3                    | 0  | 0     | 17      | 25      | 16          |   |   |      |      |      |
| TCGA-60-2698     | LUSC           | 63.6      | 34.2 | 125                | 124 | 89     | 34                   | 0  | 1     | 27      | 28      | 24          |   |   |      |      |      |
| TCGA-60-2711     | LUSC           | 47.1      | 52.9 | 143                | 137 | 99     | 5                    | 0  | 0     | 29      | 28      | 27          |   |   |      |      |      |
| TCGA-60-2713     | LUSC           | 46.6      | 51.9 | 122                | 119 | 80     | 3                    | 1  | 0     | 15      | 19      | 13          |   |   |      |      |      |
| TCGA-60-2719     | LUSC           | 62.5      | 29.0 | 125                | 123 | 90     | 4                    | 0  | 0     | 11      | 12      | 9           |   |   |      |      |      |
| TCGA-60-2724     | LUSC           | 62.8      | 49.7 | 125                | 131 | 93     | 3                    | 0  | 0     | 24      | 26      | 23          |   |   |      |      |      |
| TCGA-66-2744     | LUSC           | 66.3      | 51.2 | 130                | 128 | 99     | 4                    | 0  | 0     | 38      | 36      | 36          |   |   |      |      |      |
| TCGA-66-2759     | LUSC           | 63.9      | 51.6 | 127                | 129 | 92     | 39                   | 0  | 0     | 52      | 53      | 49          |   |   |      |      |      |
| TCGA-66-2766     | LUSC           | 46.8      | 44.1 | 133                | 125 | 82     | 9                    | 0  | 0     | 15      | 11      | 11          |   |   |      |      |      |
| TCGA-66-2789     | LUSC           | 83.6      | 37.0 | 130                | 127 | 89     | 0                    | 0  | 0     | 37      | 33      | 32          |   |   |      |      |      |
| TCGA-66-2793     | LUSC           | 73.9      | 35.4 | 129                | 143 | 91     | 54                   | 0  | 0     | 42      | 43      | 41          |   |   |      |      |      |
| TCGA-66-2795     | LUSC           | 61.8      | 34.8 | 122                | 126 | 82     | 14                   | 0  | 0     | 28      | 27      | 24          |   |   |      |      |      |
| TCGA-38-4628     | LUAD           | 84.5      | 34.6 | 125                | 121 | 75     | 0                    | 0  | 0     | 13      | 12      | 10          |   |   |      |      |      |
| TCGA-38-4630     | LUAD           | 48.5      | 36.2 | 117                | 127 | 82     | 6                    | 0  | 0     | 20      | 21      | 19          |   |   |      |      |      |
| TCGA-49-4486     | LUAD           | 34.7      | 35.3 | 106                | 113 | 70     | 0                    | 0  | 0     | 10      | 11      | 10          |   |   |      |      |      |
| TCGA-49-4510     | LUAD           | 41.0      | 30.8 | 132                | 122 | 83     | 0                    | 0  | 0     | 11      | 11      | 8           |   |   |      |      |      |
| TCGA-49-4512     | LUAD           | 55.8      | 40.5 | 125                | 126 | 92     | 0                    | 0  | 0     | 31      | 28      | 27          |   |   |      |      |      |
| TCGA-49-6742     | LUAD           | 64.2      | 68.2 | 117                | 137 | 85     | 3                    | 0  | 0     | 22      | 26      | 20          |   |   |      |      |      |
| TCGA-50-5930     | LUAD           | 46.3      | 45.6 | 127                | 122 | 87     | 0                    | 0  | 0     | 24      | 23      | 23          |   |   |      |      |      |
| TCGA-50-5932     | LUAD           | 40.0      | 45.3 | 109                | 117 | 86     | 0                    | 0  | 0     | 29      | 33      | 29          |   |   |      |      |      |
| TCGA-50-6591     | LUAD           | 45.1      | 51.2 | 114                | 131 | 80     | 0                    | 0  | 0     | 22      | 26      | 21          |   |   |      |      |      |
| TCGA-55-6972     | LUAD           | 44.8      | 38.3 | 138                | 108 | 80     | 5                    | 0  | 0     | 31      | 33      | 26          |   |   |      |      |      |
| TCGA-55-6982     | LUAD           | 64.8      | 33.6 | 139                | 138 | 92     | 0                    | 0  | 0     | 21      | 16      | 16          |   |   |      |      |      |
| TCGA-55-6984     | LUAD           | 33.3      | 41.3 | 109                | 115 | 75     | 0                    | 1  | 0     | 32      | 32      | 26          |   |   |      |      |      |
| TCGA-55-6986     | LUAD           | 39.7      | 33.4 | 131                | 130 | 89     | 0                    | 0  | 0     | 20      | 20      | 17          |   |   |      |      |      |
| TCGA-73-4659     | LUAD           | 36.4      | 35.7 | 108                | 115 | 72     | 0                    | 0  | 0     | 14      | 15      | 14          |   |   |      |      |      |
| TCGA-91-6847     | LUAD           | 46.2      | 42.6 | 101                | 125 | 68     | 0                    | 0  | 1     | 22      | 30      | 19          |   |   |      |      |      |
| TOTAL INSERTIONS |                |           |      |                    |     |        |                      |    |       |         |         | 413         | 3 | 5 | 1189 | 1230 | 1080 |

**Description**

Case submitter ID in GDC database

Average depth of coverage in bam files

Primary tumor sample coverage

Normal tissue sample coverage

Polymorphic L1 insertions found in MELT output before filtering

Number of primary tumor L1 polymorphic insertion calls

Number of normal tissue L1 polymorphic insertion calls

Number of L1 polymorphic insertion calls found both in tumor and normal tissue

L1 somatic insertion calls after filtering

Number of L1 insertion calls found in primary tumor

Number of L1 insertion calls found in normal tissue

Number of L1 insertion calls found both in tumor and normal tissue

Number of primary tumor L1 polymorphic insertion calls after filtering

Number of normal tissue L1 polymorphic insertion calls after filtering

Number of L1 polymorphic insertion calls found both in tumor and normal tissue after filtering

**Sample:**

Type of tumor

**Coverage:**

PT

NT

**Unfiltered Poly L1:**

PT

NT

**MELT insertion calls:**

Common

PT

NT

PT-NT

Poly PT

Poly NT

Poly

Common

|               | Discovery? | P value    | Mean 0 insertions | Mean >1 insertions | Difference | SE of difference | t ratio  | df |
|---------------|------------|------------|-------------------|--------------------|------------|------------------|----------|----|
| hsa-let-7a-1  | *          | < 0,0001   | 6389,63           | 4112,88            | 2276,76    | 508,865          | 4,47419  | 37 |
| hsa-let-7a-2  | *          | < 0,0001   | 12754,3           | 8199,58            | 4554,68    | 1035,16          | 4,4      | 37 |
| hsa-let-7a-3  | *          | < 0,0001   | 6448,99           | 4180,23            | 2268,76    | 514,737          | 4,40761  | 37 |
| hsa-let-7b    |            | 0,700569   | 15437,2           | 14717,5            | 719,724    | 1857,49          | 0,387472 | 38 |
| hsa-let-7c    |            | 0,337504   | 1257,44           | 1654,59            | -397,152   | 408,714          | 0,971711 | 37 |
| hsa-let-7d    |            | 0,0762467  | 690,492           | 897,586            | -207,094   | 113,452          | 1,8254   | 36 |
| hsa-let-7e    | *          | < 0,0001   | 1202,24           | 584,67             | 617,569    | 133,397          | 4,62955  | 37 |
| hsa-let-7f-2  | *          | < 0,0001   | 7173,84           | 3887,56            | 3286,28    | 739,198          | 4,44574  | 37 |
| hsa-let-7g    |            | 0,00515672 | 711,604           | 562,65             | 148,954    | 50,0942          | 2,97348  | 37 |
| hsa-let-7i    |            | 0,175339   | 600,312           | 531,649            | 68,6635    | 49,6936          | 1,38174  | 37 |
| hsa-mir-34a   | *          | < 0,0001   | 258,375           | 121,504            | 136,871    | 30,2276          | 4,52802  | 38 |
| hsa-mir-34b   |            | 0,291543   | 14,1297           | 22,0518            | -7,92218   | 7,4038           | 1,07002  | 37 |
| hsa-mir-34c   |            | 0,0658459  | 40,1709           | 102,484            | -62,3128   | 32,8725          | 1,89559  | 37 |
| hsa-mir-200a  |            | 0,864283   | 1326,75           | 1388,6             | -61,851    | 359,354          | 0,172117 | 37 |
| hsa-mir-200b  |            | 0,602682   | 895,754           | 794,176            | 101,578    | 193,418          | 0,525174 | 36 |
| hsa-mir-200c  |            | 0,538162   | 11985,1           | 13472,9            | -1487,86   | 2393,83          | 0,621538 | 36 |
| hsa-mir-429   |            | 0,0562723  | 353,184           | 195,655            | 157,529    | 79,863           | 1,97249  | 36 |
| hsa-mir-21    |            | 0,51946    | 307470            | 290656             | 16814,2    | 25852,6          | 0,650389 | 37 |
| hsa-mir-17    |            | 0,815847   | 837,164           | 882,253            | -45,089    | 192,193          | 0,234603 | 36 |
| hsa-mir-18a   |            | 0,00951988 | 12,7872           | 24,2019            | -11,4146   | 4,16723          | 2,73914  | 36 |
| hsa-mir-19a   |            | 0,0076794  | 24,9402           | 50,9265            | -25,9862   | 9,21607          | 2,81966  | 37 |
| hsa-mir-19b-2 |            | 0,332557   | 135,853           | 160,875            | -25,0219   | 25,4848          | 0,981837 | 37 |
| hsa-mir-20a   |            | 0,117302   | 212,595           | 298,805            | -86,2105   | 53,7244          | 1,60468  | 36 |
| hsa-mir-92a-2 |            | 0,294047   | 7299,51           | 9238,63            | -1939,11   | 1821,07          | 1,06482  | 36 |
| hsa-mir-221   |            | 0,769015   | 234,95            | 223,054            | 11,8957    | 40,1947          | 0,295953 | 35 |
| hsa-mir-222   |            | 0,147941   | 94,1347           | 123,918            | -29,7829   | 20,1298          | 1,47954  | 35 |

|               | Down-regulated NO INSERTIONS (FDR) | Up-regulated NO INSERTIONS (FDR) |
|---------------|------------------------------------|----------------------------------|
| hsa-let-7a-2  | 0.999670833493728                  | 0.009919197811194 **             |
| hsa-let-7a-1  | 0.999670833493728                  | 0.011404852379541 *              |
| hsa-let-7f-2  | 0.999670833493728                  | 0.011404852379541 *              |
| hsa-let-7a-3  | 0.999670833493728                  | 0.022693746426405 *              |
| hsa-let-7e    | 0.999670833493728                  | 0.078094490857035                |
| hsa-let-7g    | 0.9951132961285                    | 0.872206669613474                |
| hsa-mir-34a   | 0.9951132961285                    | 0.872206669613474                |
| hsa-mir-21    | 0.998834967282168                  | 0.872206669613474                |
| hsa-let-7b    | 0.772942472861957                  | 0.95466322269098                 |
| hsa-let-7c    | 0.423601380637498                  | 0.95466322269098                 |
| hsa-let-7d    | 0.423601380637498                  | 0.95466322269098                 |
| hsa-let-7i    | 0.772942472861957                  | 0.95466322269098                 |
| hsa-mir-34b   | 0.429905740326531                  | 0.95466322269098                 |
| hsa-mir-34c   | 0.423601380637498                  | 0.95466322269098                 |
| hsa-mir-200a  | 0.608911585117655                  | 0.95466322269098                 |
| hsa-mir-200b  | 0.665217880956605                  | 0.95466322269098                 |
| hsa-mir-200c  | 0.434085457694848                  | 0.95466322269098                 |
| hsa-mir-429   | 0.639258429507727                  | 0.95466322269098                 |
| hsa-mir-17    | 0.423601380637498                  | 0.95466322269098                 |
| hsa-mir-18a   | 0.484865179133113                  | 0.95466322269098                 |
| hsa-mir-19a   | 0.423601380637498                  | 0.95466322269098                 |
| hsa-mir-19b-2 | 0.428260752603725                  | 0.95466322269098                 |
| hsa-mir-20a   | 0.428260752603725                  | 0.95466322269098                 |
| hsa-mir-92a-2 | 0.639258429507727                  | 0.95466322269098                 |
| hsa-mir-221   | 0.428260752603725                  | 0.95466322269098                 |
| hsa-mir-222   | 0.423601380637498                  | 0.95466322269098                 |

\*\* FDR<0.01; \* FDR <0.05

|               | Discovery? | P value    | Mean 0 insertions | Mean >1 insertions | Difference | SE of difference | t ratio  | df |
|---------------|------------|------------|-------------------|--------------------|------------|------------------|----------|----|
| hsa-let-7a-1  |            | 0.811259   | 0.480698          | 0.495713           | -0.0150151 | 0.0624291        | 0.240515 | 37 |
| hsa-let-7a-2  |            | 0.789314   | 0.469172          | 0.485841           | -0.0166693 | 0.0619347        | 0.269144 | 37 |
| hsa-let-7a-3  |            | 0.816877   | 0.48102           | 0.495479           | -0.0144588 | 0.0619966        | 0.233219 | 37 |
| hsa-let-7b    |            | 0.87881    | 0.584209          | 0.573199           | 0.01101    | 0.0717229        | 0.153508 | 38 |
| hsa-let-7c    |            | 0.00640231 | 0.407236          | 0.213361           | 0.193875   | 0.0671812        | 2.88585  | 38 |
| hsa-let-7d    |            | 0.27441    | 0.562443          | 0.484549           | 0.0778941  | 0.0701826        | 1.10988  | 36 |
| hsa-let-7e    |            | 0.335279   | 0.341726          | 0.280913           | 0.060813   | 0.0622923        | 0.976252 | 37 |
| hsa-let-7f-2  |            | 0.820621   | 0.416792          | 0.40006            | 0.0167322  | 0.0732697        | 0.228364 | 37 |
| hsa-let-7g    |            | 0.45017    | 0.681717          | 0.630438           | 0.0512785  | 0.0672057        | 0.763008 | 38 |
| hsa-let-7i    |            | 0.607081   | 0.563465          | 0.591099           | -0.0276344 | 0.0532797        | 0.518667 | 37 |
| hsa-mir-34a   |            | 0.648227   | 0.330608          | 0.366547           | -0.0359388 | 0.0781491        | 0.459875 | 38 |
| hsa-mir-34b   |            | 0.85133    | 0.244194          | 0.226401           | 0.0177933  | 0.0942753        | 0.188737 | 37 |
| hsa-mir-34c   |            | 0.291671   | 0.269225          | 0.176315           | 0.09291    | 0.0868538        | 1.06973  | 37 |
| hsa-mir-200a  |            | 0.0505448  | 0.414823          | 0.258322           | 0.156501   | 0.0774322        | 2.02114  | 37 |
| hsa-mir-200b  |            | 0.0739224  | 0.43227           | 0.291067           | 0.141203   | 0.0767126        | 1.84068  | 36 |
| hsa-mir-200c  |            | 0.020224   | 0.544989          | 0.367096           | 0.177893   | 0.0732138        | 2.42978  | 36 |
| hsa-mir-429   |            | 0.00789936 | 0.382171          | 0.191162           | 0.191009   | 0.0677867        | 2.81779  | 35 |
| hsa-mir-21    |            | 0.296335   | 0.693197          | 0.633363           | 0.0598333  | 0.0564844        | 1.05929  | 37 |
| hsa-mir-17    |            | 0.437549   | 0.24329           | 0.2907             | -0.0474101 | 0.0603897        | 0.78507  | 36 |
| hsa-mir-18a   |            | 0.217464   | 0.371112          | 0.28663            | 0.0844819  | 0.0673011        | 1.25528  | 36 |
| hsa-mir-19a   |            | 0.940266   | 0.34279           | 0.348968           | -0.0061786 | 0.0818928        | 0.075447 | 37 |
| hsa-mir-19b-2 |            | 0.821321   | 0.444056          | 0.461259           | -0.0172033 | 0.0756331        | 0.227457 | 37 |
| hsa-mir-20a   |            | 0.771917   | 0.384745          | 0.408165           | -0.0234204 | 0.0801902        | 0.29206  | 36 |
| hsa-mir-92a-2 |            | 0.703678   | 0.348132          | 0.377677           | -0.0295447 | 0.0770598        | 0.383399 | 36 |
| hsa-mir-221   |            | 0.0398273  | 0.463609          | 0.328545           | 0.135065   | 0.0632584        | 2.13513  | 35 |
| hsa-mir-222   |            | 0.298158   | 0.402576          | 0.324532           | 0.0780442  | 0.0739587        | 1.05524  | 37 |



|               | Discovery? | P value    | Mean 0 insertions | Mean >1 insertions | Difference | SE of difference | t ratio  | df |
|---------------|------------|------------|-------------------|--------------------|------------|------------------|----------|----|
| hsa-let-7a-1  | *          | 0,0010389  | 6649,04           | 3861,02            | 2788,03    | 789,586          | 3,531    | 41 |
| hsa-let-7a-2  | *          | 0,00103993 | 13280,8           | 7674,08            | 5606,71    | 1588,01          | 3,53066  | 41 |
| hsa-let-7a-3  | *          | 0,00119799 | 6711,58           | 3936,7             | 2774,88    | 797,016          | 3,48159  | 41 |
| hsa-let-7b    |            | 0,459978   | 16965,3           | 15325              | 1640,27    | 2198,5           | 0,746085 | 40 |
| hsa-let-7c    |            | 0,252202   | 1359,77           | 1733,47            | -373,697   | 321,769          | 1,16139  | 41 |
| hsa-let-7d    |            | 0,00400422 | 628,825           | 895,523            | -266,698   | 87,5773          | 3,04528  | 42 |
| hsa-let-7e    | *          | 0,00080871 | 1011,89           | 520,1              | 491,788    | 135,959          | 3,61717  | 41 |
| hsa-let-7f-2  |            | 0,00451808 | 6594,19           | 3489,51            | 3104,68    | 1030,17          | 3,01375  | 39 |
| hsa-let-7g    |            | 0,037565   | 703,605           | 572,997            | 130,608    | 60,817           | 2,14756  | 42 |
| hsa-let-7i    |            | 0,0897111  | 618,008           | 491,085            | 126,923    | 72,9825          | 1,73909  | 40 |
| hsa-mir-34a   | *          | 0,00013916 | 247,358           | 106,943            | 140,415    | 33,3277          | 4,21318  | 40 |
| hsa-mir-34b   |            | 0,0383327  | 12,3378           | 28,8924            | -16,5546   | 7,73492          | 2,14025  | 41 |
| hsa-mir-34c   |            | 0,0360055  | 46,9052           | 110,132            | -63,227    | 29,1619          | 2,16813  | 41 |
| hsa-mir-200a  |            | 0,0779602  | 1035,25           | 1478,11            | -442,86    | 244,957          | 1,80791  | 41 |
| hsa-mir-200b  |            | 0,152301   | 696,547           | 900,843            | -204,296   | 139,999          | 1,45927  | 40 |
| hsa-mir-200c  |            | 0,0046207  | 9935,68           | 16573,6            | -6637,9    | 2215,26          | 2,99644  | 41 |
| hsa-mir-429   |            | 0,43293    | 178,86            | 211,756            | -32,8956   | 41,5255          | 0,792179 | 40 |
| hsa-mir-21    |            | 0,320546   | 329966            | 302639             | 27326,7    | 27176,8          | 1,00552  | 41 |
| hsa-mir-17    |            | 0,0236508  | 633,971           | 932,884            | -298,913   | 127,18           | 2,35031  | 41 |
| hsa-mir-18a   |            | 0,0193843  | 15,7268           | 26,9796            | -11,2528   | 4,62348          | 2,43382  | 41 |
| hsa-mir-19a   |            | 0,00416747 | 23,5588           | 46,7878            | -23,229    | 7,64293          | 3,03928  | 40 |
| hsa-mir-19b-2 |            | 0,181101   | 108,289           | 135,447            | -27,1586   | 19,9443          | 1,36172  | 39 |
| hsa-mir-20a   | *          | 0,00223585 | 177,453           | 300,195            | -122,742   | 37,5713          | 3,2669   | 40 |
| hsa-mir-92a-2 |            | 0,0399419  | 5822,92           | 8259,04            | -2436,12   | 1148,13          | 2,12182  | 41 |
| hsa-mir-221   |            | 0,711901   | 235,589           | 255,839            | -20,2506   | 54,4554          | 0,371875 | 41 |
| hsa-mir-222   |            | 0,677125   | 106,974           | 116,9              | -9,92579   | 23,6633          | 0,419459 | 40 |

|                | Discovery? | P value    | Mean 0 insertions | Mean >1 insertions | Difference | SE of difference | t ratio   | df |
|----------------|------------|------------|-------------------|--------------------|------------|------------------|-----------|----|
| hsa-let-7a-1   | *          | 0.0010389  | 6649.04           | 3861.02            | 2788.03    | 789.586          | 3.531     | 41 |
| hsa-let-7a-2   | *          | 0.00103993 | 13280.8           | 7674.08            | 5606.71    | 1588.01          | 3.53066   | 41 |
| hsa-let-7a-3   | *          | 0.00119799 | 6711.58           | 3936.7             | 2774.88    | 797.016          | 3.481559  | 41 |
| hsa-let-7b     | *          | 0.459978   | 16965.3           | 15325              | 1640.27    | 2198.5           | 0.746085  | 40 |
| hsa-let-7c     | *          | 0.252202   | 1359.77           | 1733.47            | -373.697   | 321.769          | 1.16139   | 41 |
| hsa-let-7d     | *          | 0.00400422 | 628.825           | 895.523            | -266.698   | 87.5773          | 3.04528   | 42 |
| hsa-let-7e     | *          | 0.00080871 | 1011.89           | 520.1              | 491.788    | 135.959          | 3.61717   | 41 |
| hsa-let-7f-2   | *          | 0.00451808 | 6594.19           | 3489.51            | 3104.68    | 1030.17          | 3.01375   | 39 |
| hsa-let-7g     | *          | 0.037565   | 703.605           | 572.997            | 130.608    | 60.817           | 2.14756   | 42 |
| hsa-let-7i     | *          | 0.0897111  | 618.008           | 491.085            | 126.923    | 72.9825          | 1.73909   | 40 |
| hsa-mir-100    | *          | 0.119421   | 6957.06           | 3528.24            | 3428.82    | 2154.76          | 1.59128   | 40 |
| hsa-mir-101-1  | *          | 0.0111306  | 12970.7           | 8765.45            | 4205.22    | 1579.69          | 2.66205   | 40 |
| hsa-mir-103-1  | *          | 0.0227826  | 11917.9           | 16054.6            | -4136.74   | 1748.31          | 2.36613   | 41 |
| hsa-mir-106b   | *          | 0.00041307 | 554.632           | 935.879            | -381.247   | 99.1694          | 3.8444    | 41 |
| hsa-mir-10a    | *          | 0.555026   | 22781.2           | 20612.4            | 2168.74    | 3643.37          | 0.595255  | 40 |
| hsa-mir-10b    | *          | 0.249851   | 8534.46           | 12088.6            | -3554.18   | 3044.9           | 1.16726   | 41 |
| hsa-mir-1247   | *          | 0.793903   | 18.0602           | 16.3879            | 1.67225    | 6.35844          | 0.262997  | 40 |
| hsa-mir-125a   | *          | 0.0718557  | 620.823           | 489.48             | 131.343    | 71.0811          | 1.84779   | 41 |
| hsa-mir-125b-1 | *          | 0.523782   | 408.383           | 346.686            | 61.6967    | 95.9255          | 0.643174  | 40 |
| hsa-mir-126    | *          | 0.340332   | 4188.06           | 5023.98            | -835.918   | 866.216          | 0.965023  | 40 |
| hsa-mir-128-1  | *          | 0.00087143 | 66.7548           | 129.475            | -62.7207   | 17.4292          | 3.59859   | 40 |
| hsa-mir-128-2  | *          | 0.00015327 | 47.5223           | 96.1291            | -48.6068   | 11.5932          | 4.19269   | 39 |
| hsa-mir-1307   | *          | 0.00254383 | 1228.86           | 2080.89            | -852.034   | 265.008          | 3.21512   | 41 |
| hsa-mir-140    | *          | 0.142376   | 585.044           | 465.254            | 119.791    | 80.0871          | 1.49576   | 41 |
| hsa-mir-141    | *          | 0.00718043 | 2461.99           | 3893.56            | -1431.57   | 505.895          | 2.82978   | 41 |
| hsa-mir-142    | *          | 0.565181   | 4554.63           | 5139.64            | -585.008   | 1008.88          | 0.579862  | 41 |
| hsa-mir-143    | *          | 0.023165   | 69682.2           | 42261.3            | 27420.9    | 11623.5          | 2.3591    | 41 |
| hsa-mir-145    | *          | 0.267181   | 1237.3            | 1028.65            | 208.648    | 185.42           | 1.12527   | 40 |
| hsa-mir-146b   | *          | 0.0820425  | 1494.59           | 1074.8             | 419.793    | 235.759          | 1.78061   | 43 |
| hsa-mir-148a   | *          | 0.152025   | 84403.9           | 65727.2            | 18676.6    | 12807.1          | 1.4583    | 43 |
| hsa-mir-148b   | *          | 0.467341   | 328.614           | 369.769            | -41.155    | 56.0836          | 0.733815  | 40 |
| hsa-mir-151a   | *          | 0.459035   | 2993.58           | 3238.22            | -244.637   | 327.12           | 0.747852  | 39 |
| hsa-mir-152    | *          | 0.0639914  | 331.083           | 458.198            | -127.115   | 66.7281          | 1.90497   | 40 |
| hsa-mir-155    | *          | 0.130193   | 341.27            | 449.531            | -108.26    | 70.0283          | 1.54595   | 39 |
| hsa-mir-16-1   | *          | 0.0736175  | 958.08            | 1238.03            | -279.951   | 152.479          | 1.836     | 41 |
| hsa-mir-17     | *          | 0.0236508  | 633.971           | 932.884            | -298.913   | 127.18           | 2.35031   | 41 |
| hsa-mir-18a    | *          | 0.193843   | 15.7268           | 26.9796            | -11.2528   | 4.62348          | 2.43382   | 41 |
| hsa-mir-181a-1 | *          | 0.00537774 | 2042.15           | 1319.19            | 722.96     | 245.594          | 2.94372   | 40 |
| hsa-mir-181a-2 | *          | 0.906397   | 1125.88           | 1107.3             | 18.5828    | 157.04           | 0.118332  | 40 |
| hsa-mir-181b-1 | *          | 0.00072474 | 581.012           | 321.778            | 259.234    | 70.9332          | 3.65463   | 41 |
| hsa-mir-182    | *          | 0.0841456  | 27737.5           | 36189.3            | -8451.82   | 4774.75          | 1.77011   | 41 |
| hsa-mir-183    | *          | < 0.0001   | 12057.1           | 24025.6            | -11968.5   | 2717.66          | 4.40398   | 41 |
| hsa-mir-186    | *          | 0.239244   | 382.762           | 458.933            | -76.1709   | 63.7813          | 1.19425   | 41 |
| hsa-mir-19a    | *          | 0.00416747 | 23.5588           | 46.7878            | -23.229    | 7.64293          | 3.03928   | 40 |
| hsa-mir-19b-2  | *          | 0.181101   | 108.289           | 135.447            | -27.1586   | 19.9443          | 1.36172   | 39 |
| hsa-mir-191    | *          | 0.191718   | 724.401           | 576.374            | 148.027    | 111.516          | 1.32741   | 41 |
| hsa-mir-192    | *          | 0.803246   | 838.475           | 905.982            | -67.5067   | 269.11           | 0.250852  | 39 |
| hsa-mir-199a-1 | *          | 0.598369   | 1303.68           | 1451.13            | -147.45    | 277.695          | 0.530979  | 40 |
| hsa-mir-199a-2 | *          | 0.581062   | 2277.46           | 2554.76            | -277.308   | 498.43           | 0.556363  | 40 |
| hsa-mir-199b   | *          | 0.605234   | 3043.83           | 3402.08            | -358.256   | 687.621          | 0.521008  | 40 |
| hsa-mir-20a    | *          | 0.00223585 | 177.453           | 300.195            | -122.742   | 37.5713          | 3.2669    | 40 |
| hsa-mir-200a   | *          | 0.0779602  | 1035.25           | 1478.11            | -442.86    | 244.957          | 1.80791   | 41 |
| hsa-mir-200b   | *          | 0.152301   | 696.547           | 900.843            | -204.296   | 139.999          | 1.45927   | 40 |
| hsa-mir-200c   | *          | 0.0046207  | 9935.68           | 16573.6            | -6637.9    | 2215.26          | 2.99644   | 41 |
| hsa-mir-203    | *          | 0.00201005 | 9763.98           | 30921.1            | -21157.2   | 6401.4           | 3.30508   | 40 |
| hsa-mir-21     | *          | 0.320546   | 329966            | 302636             | 27326.7    | 27176.8          | 1.00552   | 41 |
| hsa-mir-210    | *          | 0.00074486 | 1540.32           | 3259.13            | -1718.81   | 471.515          | 3.64529   | 41 |
| hsa-mir-22     | *          | 0.266497   | 64120.7           | 71701.1            | -7580.31   | 6728.99          | 1.12652   | 41 |
| hsa-mir-221    | *          | 0.711901   | 235.589           | 255.839            | -20.2506   | 54.4554          | 0.371875  | 41 |
| hsa-mir-222    | *          | 0.677125   | 106.974           | 116.9              | -9.92579   | 23.6633          | 0.419459  | 40 |
| hsa-mir-23a    | *          | 0.00290393 | 3738.53           | 5197.75            | -1459.22   | 461.418          | 3.16248   | 42 |
| hsa-mir-23b    | *          | 0.0844826  | 2083.79           | 2694.8             | -611.002   | 345.567          | 1.76811   | 41 |
| hsa-mir-24-2   | *          | 0.632854   | 2617.8            | 2810.27            | -192.466   | 399.879          | 0.481311  | 41 |
| hsa-mir-25     | *          | < 0.0001   | 6493.3            | 14823.1            | -8329.81   | 1705.08          | 4.88529   | 41 |
| hsa-mir-26a-2  | *          | 0.00042198 | 3311.49           | 1779.25            | 1532.24    | 399.306          | 3.83726   | 41 |
| hsa-mir-26b    | *          | 0.341009   | 955.44            | 828.891            | 126.549    | 131.361          | 0.963372  | 41 |
| hsa-mir-27a    | *          | 0.877617   | 1709.25           | 1664.89            | 44.3625    | 286.248          | 0.154979  | 40 |
| hsa-mir-27b    | *          | 0.348142   | 2458.61           | 2079.79            | 378.828    | 399.265          | 0.948815  | 42 |
| hsa-mir-28     | *          | 0.0853609  | 4880.43           | 6318.45            | -1438.02   | 816.168          | 1.76192   | 42 |
| hsa-mir-29a    | *          | < 0.0001   | 11772.1           | 4468.46            | 7303.65    | 1575.09          | 4.63696   | 41 |
| hsa-mir-29b-1  | *          | 0.00102067 | 584.082           | 317.214            | 266.869    | 75.448           | 3.53712   | 41 |
| hsa-mir-29b-2  | *          | 0.00125344 | 626.645           | 360.234            | 266.411    | 77.0026          | 3.45977   | 42 |
| hsa-mir-29c    | *          | 0.00048511 | 2710.04           | 1343.48            | 1366.56    | 359.751          | 3.79863   | 40 |
| hsa-mir-30a    | *          | 0.98941    | 17710.5           | 17669.1            | 41.4525    | 3103.71          | 0.0133558 | 40 |
| hsa-mir-30b    | *          | 0.011888   | 903.381           | 409.363            | 494.018    | 187.644          | 2.63274   | 41 |
| hsa-mir-30c-2  | *          | 0.589226   | 540.557           | 577.704            | -37.1467   | 68.241           | 0.544345  | 40 |
| hsa-mir-30d    | *          | 0.0458337  | 11205.3           | 6985.72            | 4219.61    | 2045.56          | 2.06282   | 39 |
| hsa-mir-30e    | *          | 0.562658   | 11724.9           | 16152              | 972.928    | 1666.65          | 0.583762  | 40 |
| hsa-mir-34a    | *          | 0.00013916 | 247.358           | 106.943            | 140.415    | 33.3277          | 4.21318   | 40 |
| hsa-mir-34b    | *          | 0.0383327  | 12.3378           | 28.8924            | -16.5546   | 7.73492          | 2.14025   | 41 |
| hsa-mir-34c    | *          | 0.0360055  | 46.9052           | 110.132            | -63.227    | 29.1619          | 2.16813   | 41 |
| hsa-mir-361    | *          | 0.269269   | 318.97            | 271.97             | 47         | 41.9532          | 1.1203    | 40 |
| hsa-mir-374a   | *          | 0.804948   | 973.355           | 948.577            | 24.7778    | 99.672           | 0.248593  | 40 |
| hsa-mir-375    | *          | < 0.0001   | 28638.7           | 1739.27            | 26899.5    | 6135.86          | 4.38397   | 39 |
| hsa-mir-429    | *          | 0.43293    | 178.86            | 211.756            | -32.8956   | 41.5255          | 0.792179  | 40 |
| hsa-mir-532    | *          | 0.298194   | 798.969           | 969.966            | -170.998   | 162.284          | 1.05369   | 41 |
| hsa-mir-92a-2  | *          | 0.0399419  | 5822.92           | 8259.04            | -2436.12   | 1148.13          | 2.12182   | 41 |
| hsa-mir-93     | *          | < 0.0001   | 3183.31           | 7875.17            | -4691.87   | 863.43           | 5.43399   | 41 |
| hsa-mir-99b    | *          | 0.34135    | 30202.9           | 26313.6            | 3889.3     | 4040.07          | 0.962683  | 41 |

|               | Discovery? | P value   | Mean 0 insertions | Mean >1 insertions | Difference  | SE of difference | t ratio   | df |
|---------------|------------|-----------|-------------------|--------------------|-------------|------------------|-----------|----|
| hsa-let-7a-1  |            | 0,98099   | 0,463243          | 0,46501            | -0,0017664  | 0,0736816        | 0,0239734 | 41 |
| hsa-let-7a-2  |            | 0,987214  | 0,462162          | 0,463356           | -0,00119429 | 0,0740704        | 0,0161237 | 41 |
| hsa-let-7a-3  |            | 0,958626  | 0,463335          | 0,467166           | -0,00383084 | 0,0733935        | 0,0521959 | 41 |
| hsa-let-7b    |            | 0,876557  | 0,469361          | 0,459521           | 0,00983987  | 0,0629417        | 0,156333  | 40 |
| hsa-let-7c    |            | 0,0697986 | 0,351242          | 0,232458           | 0,118784    | 0,0637979        | 1,86188   | 41 |
| hsa-let-7d    |            | 0,0759944 | 0,506158          | 0,395171           | 0,110987    | 0,0610043        | 1,81933   | 42 |
| hsa-let-7e    |            | 0,7281    | 0,384512          | 0,409737           | -0,0252252  | 0,0720638        | 0,35004   | 41 |
| hsa-let-7f-2  |            | 0,780127  | 0,330059          | 0,310725           | 0,0193339   | 0,0687819        | 0,28109   | 39 |
| hsa-let-7g    |            | 0,738525  | 0,585207          | 0,565964           | 0,0192428   | 0,057266         | 0,336025  | 42 |
| hsa-let-7i    |            | 0,857094  | 0,478507          | 0,489858           | -0,0113513  | 0,0626413        | 0,181212  | 41 |
| hsa-mir-34a   |            | 0,576568  | 0,357295          | 0,399707           | -0,0424121  | 0,0753306        | 0,563013  | 40 |
| hsa-mir-34b   |            | 0,843279  | 0,150189          | 0,1639             | -0,0137105  | 0,0689114        | 0,198959  | 41 |
| hsa-mir-34c   |            | 0,722209  | 0,162988          | 0,190226           | -0,0272382  | 0,0760927        | 0,357961  | 41 |
| hsa-mir-200a  |            | 0,066558  | 0,304624          | 0,198382           | 0,106242    | 0,0563675        | 1,8848    | 41 |
| hsa-mir-200b  |            | 0,406833  | 0,367692          | 0,313634           | 0,0540582   | 0,0644839        | 0,83832   | 40 |
| hsa-mir-200c  |            | 0,937121  | 0,41371           | 0,40718            | 0,00652934  | 0,0822601        | 0,0793743 | 41 |
| hsa-mir-429   |            | 0,525664  | 0,314785          | 0,273339           | 0,0414462   | 0,0647349        | 0,640245  | 40 |
| hsa-mir-21    |            | 0,61918   | 0,638485          | 0,665902           | -0,027417   | 0,054745         | 0,500814  | 41 |
| hsa-mir-17    |            | 0,707371  | 0,390812          | 0,363903           | 0,0269092   | 0,071186         | 0,378012  | 41 |
| hsa-mir-18a   |            | 0,211808  | 0,332274          | 0,236385           | 0,0958888   | 0,0755979        | 1,26841   | 41 |
| hsa-mir-19a   |            | 0,0964777 | 0,220507          | 0,334859           | -0,114352   | 0,0671789        | 1,70221   | 40 |
| hsa-mir-19b-2 |            | 0,0194079 | 0,357518          | 0,522364           | -0,164846   | 0,0676035        | 2,43842   | 39 |
| hsa-mir-20a   |            | 0,740829  | 0,337519          | 0,359804           | -0,0222848  | 0,0669096        | 0,333059  | 40 |
| hsa-mir-92a-2 |            | 0,629718  | 0,424938          | 0,388063           | 0,036875    | 0,0759108        | 0,485767  | 41 |
| hsa-mir-221   |            | 0,610987  | 0,309385          | 0,275763           | 0,0336223   | 0,0655927        | 0,512593  | 41 |
| hsa-mir-222   |            | 0,835716  | 0,321192          | 0,335416           | -0,0142234  | 0,0681416        | 0,208733  | 40 |



|               | Discovery? | P value   | Mean 0 insertions | Mean >1 insertions | Difference | SE of difference | t ratio  | df   |
|---------------|------------|-----------|-------------------|--------------------|------------|------------------|----------|------|
| hsa-let-7a-1  |            | 0,639935  | 0,543149          | 0,573305           | -0,0301565 | 0,0638536        | 0,472276 | 32,0 |
| hsa-let-7a-2  |            | 0,641723  | 0,539759          | 0,569778           | -0,0300192 | 0,0639054        | 0,469744 | 32,0 |
| hsa-let-7a-3  |            | 0,610677  | 0,545227          | 0,577777           | -0,0325507 | 0,0633092        | 0,514155 | 32,0 |
| hsa-let-7b    |            | 0,856758  | 0,473164          | 0,48882            | -0,0156556 | 0,0860574        | 0,181921 | 33,0 |
| hsa-let-7c    |            | 0,559296  | 0,338033          | 0,286321           | 0,0517125  | 0,0876397        | 0,590057 | 32,0 |
| hsa-let-7d    |            | 0,611078  | 0,434326          | 0,393702           | 0,0406238  | 0,0791002        | 0,513574 | 32,0 |
| hsa-let-7e    |            | 0,722865  | 0,558457          | 0,586251           | -0,0277937 | 0,0776863        | 0,357769 | 32,0 |
| hsa-let-7f-2  |            | 0,704482  | 0,550936          | 0,522865           | 0,0280716  | 0,0733327        | 0,382798 | 31,0 |
| hsa-let-7g    |            | 0,16717   | 0,476528          | 0,35792            | 0,118608   | 0,0839122        | 1,41348  | 32,0 |
| hsa-let-7i    |            | 0,804942  | 0,481651          | 0,50096            | -0,0193089 | 0,0775417        | 0,249013 | 32,0 |
| hsa-mir-34a   |            | 0,311754  | 0,515715          | 0,425365           | 0,0903507  | 0,0879076        | 1,02779  | 32,0 |
| hsa-mir-34b   |            | 0,298895  | 0,223496          | 0,147123           | 0,0763732  | 0,0723623        | 1,05543  | 33,0 |
| hsa-mir-34c   |            | 0,210877  | 0,28382           | 0,176961           | 0,106859   | 0,0837481        | 1,27596  | 33,0 |
| hsa-mir-200a  |            | 0,629332  | 0,420852          | 0,46082            | -0,0399678 | 0,0819848        | 0,487503 | 31,0 |
| hsa-mir-200b  |            | 0,347076  | 0,354562          | 0,432957           | -0,0783956 | 0,0821086        | 0,95478  | 31,0 |
| hsa-mir-200c  |            | 0,216411  | 0,512961          | 0,405404           | 0,107558   | 0,0852929        | 1,26104  | 32,0 |
| hsa-mir-429   |            | 0,132548  | 0,28543           | 0,433004           | -0,147574  | 0,0955307        | 1,54478  | 31,0 |
| hsa-mir-21    |            | 0,0212201 | 0,5502            | 0,369336           | 0,180864   | 0,0746397        | 2,42317  | 32,0 |
| hsa-mir-17    |            | 0,337206  | 0,279988          | 0,187778           | 0,0922098  | 0,0946403        | 0,974319 | 32,0 |
| hsa-mir-18a   |            | 0,770611  | 0,209792          | 0,181271           | 0,0285214  | 0,0969651        | 0,294141 | 31,0 |
| hsa-mir-19a   |            | 0,500835  | 0,258057          | 0,200665           | 0,057392   | 0,084289         | 0,680896 | 32,0 |
| hsa-mir-19b-2 |            | 0,757504  | 0,30268           | 0,271613           | 0,0310671  | 0,0997864        | 0,311336 | 33,0 |
| hsa-mir-20a   |            | 0,589296  | 0,273441          | 0,221664           | 0,0517761  | 0,0949707        | 0,54518  | 33,0 |
| hsa-mir-92a-2 |            | 0,15013   | 0,405995          | 0,277911           | 0,128084   | 0,0868001        | 1,47563  | 31,0 |
| hsa-mir-221   |            | 0,10285   | 0,435371          | 0,29448            | 0,140891   | 0,0839777        | 1,67772  | 33,0 |
| hsa-mir-222   |            | 0,341062  | 0,300849          | 0,227858           | 0,0729905  | 0,0755236        | 0,966459 | 32,0 |

| <b>Primer name</b>     | <b>Sequence (5' to 3')</b>                      |
|------------------------|-------------------------------------------------|
| Let7aAAA               | TGAGGTAGTAGGTTGTATAGTTAAA                       |
| Let7bAAA               | TGAGGTAGTAGGTTGTGTGGTTAAA                       |
| miR34aAAA              | TGGCAGTGTCTTAGCTGGTTGTAAA                       |
| Let7-ORF2PCRFw         | CACAAGCATTCTTATACACC                            |
| Let7-ORF2PCRbrv        | TATGGCTAGCCAGTTTTCC                             |
| Let7-ORF2PCRa_PG2rv    | AAAATCCCCCAACGTGATTCCTCCAGCTTTGTTC              |
| Let7-ORF2PCRB_PG2fw    | GAGGAATCACGTTGGGGGATTTTAACTATACTAC              |
| N51 Fw                 | GAATGATTTTGACGAGCTGAGAGAA                       |
| N51 Rv                 | GTCCTCCCGTAGCT CAGAGTAATT                       |
| SV40 Fw                | TGGACAAACCACAACCTAGAATGC                        |
| SV40 Rv                | TTGCAGCTTATAATGGTTAC                            |
| HMGA2 Fw               | TTGCTGCCTTTGGGTCTTCC                            |
| HMGA2 Rv               | CAGCGCCTCAGAAGAGAGGACG                          |
| DICER Fw               | AGTGGTAGGCTTTACACAG                             |
| DICER Rv               | AGAAAGGACCCATTGGTGAG                            |
| GAPDH Fw               | TGCACCACCAACTGCTTAGC                            |
| GAPDH Rv               | GGCATGGACTGTGGTCATGAG                           |
| NEOjunct2 Fw           | TGCCTCGTCCTGAAGCTC                              |
| NEOjunct2 Rv           | CAATCGGCTGCTCTGATG                              |
| CMV Fw                 | ACTGCCAAGTAGGAAAGTCCCA                          |
| CMV Rv                 | ATGCCAAGTACGCCCCCTAT                            |
| EBNA-1 Fw              | CGTCATCTCCGTCATCACC                             |
| EBNA-1 Rv              | AGATTTGCCTCCCTGGTTTC                            |
| genomicGAPDH Fw        | CGTTTCCCAAAGTCCTCCTGT                           |
| genomicGAPDH Rv        | AGGTGATCGGTGCTGGTTC                             |
| scrb Fw                | TACAGTTGCGTTGTAGAACGATATAGAGGAACTACGCAGTAAGGTA  |
| scrb Rv                | TACCTTACTGCGTAGTTCCTCTATATCGTTCTACAACGCAACTGTA  |
| bs2 Fw                 | TACGAACAAAGCTGGAGGCATCACAACCTGACTTCAAACCTAGTA   |
| bs2 Rv                 | TACTAGTTTGAAGTCAGGTAGTGTGATGCCTCCAGCTTTGTTCGTA  |
| 8mer Fw                | TACGAACAAAGCTGGAGGCATCACTCTACCTCACTTCAAACCTAGTA |
| 8mer Rv                | TACTAGTTTGAAGTCAGGTAGTGTGATGCCTCCAGCTTTGTTCGTA  |
| Let7-ORF2PCRa_8mer     | GAAGTGAGGTAGAGTGATGCCTCCAGCTTTGTTC              |
| Let7-ORF2PCRB_8mer     | GAGGCATCACTCTACCTCACTTCAAACCTATACTAC            |
| Let7-Bcl1-ORF2bs-PCRFw | TGATTACAGCCGAATTCTACC                           |
